# Supplementary material for: Qualitative aspects and validation of a screening method for pesticides in vegetables and fruits based on liquid chromatography coupled to full scan high resolution (Orbitrap) mass spectrometry
Source: PubMed Central journal article supplement (PMC3380251; doi:10.1007/s00216-012-6100-x), 2012-06-05
Supplement: 216_2012_6100_MOESM1_ESM.pdf [file 216_2012_6100_MOESM1_ESM.pdf]

**Analytical and Bioanalytical Chemistry**

**Electronic Supplementary Material**

**Qualitative aspects and validation of a screening method for pesticides in vegetables and fruits based on liquid chromatography coupled to full scan high resolution (Orbitrap) mass spectrometry**

Hans G.J. Mol, Paul Zomer, Maarten de Koning

| Exactive pesticide screening database (Supplemental Information Mol et al, Analytical and Bioanalytical Chemistry (2012)) |                   |       |           |         |       |                                         |                      |                     |              |                                                    |            |                 |            |            |            |
|---------------------------------------------------------------------------------------------------------------------------|-------------------|-------|-----------|---------|-------|-----------------------------------------|----------------------|---------------------|--------------|----------------------------------------------------|------------|-----------------|------------|------------|------------|
| Analyte                                                                                                                   | Molecular formula | RT    | [M] (a)   | RIA (b) |       | Rel. abundance ESI <sup>+</sup> adducts |                      |                     | Fragment     | Fragments (Exactive Orbitrap using HCD cell 30 eV) |            |                 |            |            |            |
|                                                                                                                           |                   | min   |           | [M+1]   | [M+2] | [M+H] <sup>+</sup>                      | [M+NH4] <sup>+</sup> | [M+Na] <sup>+</sup> | Rel. Int (c) | Fragment 1                                         | Fragment 1 | Fragment 2      | Fragment 2 | Fragment 3 | Fragment 3 |
| Abamectin B1a                                                                                                             | C48H72O14         | 15.82 | 872.49221 | 54      | 17    | 0                                       | 100                  | 0                   | 4            | C34H47O7                                           | 567.3316   | C9H21O11        | 305.1078   |            |            |
| Acephate                                                                                                                  | C4H10NO3PS        | 5.82  | 183.01190 | 6       | 5     | 100                                     | 10                   | 1                   | 19           | C2H8O3PS                                           | 142.9926   | C2H6O2PS        | 124.9821   | C3H7NO3P   | 136.0152   |
| Acetamide 2(1-naphthyl)                                                                                                   | C12H11NO          | 8.52  | 185.08406 | 14      | 1     | 100                                     | 75                   | 15                  |              |                                                    |            |                 |            |            |            |
| Acetamidrid                                                                                                               | C10H11CIN4        | 7.07  | 222.06722 | 13      | 33    | 100                                     | 0                    | 0                   |              | C6H5CIN                                            | 126.1050   |                 |            |            |            |
| Acetochlor                                                                                                                | C14H20CINO2       | 11.12 | 269.11826 | 16      | 34    | 100                                     | 10                   | 5                   |              | C10H14N                                            | 148.1121   | C12H15CINO      | 224.0837   |            |            |
| Acibenzolar-s-Methyl                                                                                                      | C8H6N2OS2         | 10.56 | 209.99216 | 11      | 10    | 100                                     | 5                    | 1                   |              |                                                    |            |                 |            |            |            |
| Acrinathrin                                                                                                               | C26H21F6NO5       | 13.68 | 541.13239 | 29      | 5     | 0                                       | 80                   | 100                 |              | C14H18NO                                           | 208.0757   | C13H9O          | 181.0648   |            |            |
| Alachlor                                                                                                                  | C14H20CINO2       | 11.15 | 269.11826 | 16      | 34    | 100                                     | 5                    | 1                   |              | C11H16N                                            | 162.1277   | C13H17CINO      | 238.0993   |            |            |
| Alanycarb                                                                                                                 | C17H25N3O4S2      | 11.26 | 399.12865 | 22      | 12    | 50                                      | 0                    | 100                 |              |                                                    |            |                 |            |            |            |
| Aldicarb                                                                                                                  | C7H14N2O2S        | 6.22  | 190.07760 | 10      | 5     | 0                                       | 100                  | 0                   |              |                                                    |            |                 |            |            |            |
| Aldicarb-sulfone                                                                                                          | C7H14N2O4S        | 5.76  | 222.06743 | 10      | 6     | 50                                      | 100                  | 0                   | 0.1          | C5H10NO2S                                          | 148.0427   |                 |            |            |            |
| Aldicarb-sulfoxide                                                                                                        | C7H14N2O3S        | 5.52  | 206.07251 | 10      | 5     | 100                                     | 5                    | 5                   | 13           | C4H9S                                              | 89.0419    |                 |            |            |            |
| Allethrin                                                                                                                 | C19H26O3          | 12.71 | 302.18820 | 21      | 3     | 100                                     | 0                    | 10                  |              |                                                    | 142.9391   |                 | 114.9617   |            |            |
| Ametryn                                                                                                                   | C9H17N5S          | 10.43 | 227.12047 | 13      | 5     | 100                                     | 0                    | 0                   |              | C6H12N5S                                           | 186.0808   | C4H6N3          | 96.0556    |            |            |
| Amidosulfuron                                                                                                             | C9H15N5O7S2       | 8.03  | 369.04129 | 14      | 11    | 100                                     | 0                    | 15                  | 14           | C7H9N4O5S                                          | 261.0299   |                 |            |            |            |
| Amitraz                                                                                                                   | C19H23N3          | 10.80 | 293.18920 | 22      | 2     | 100                                     | 0                    | 0                   |              |                                                    |            |                 |            |            |            |
| Amitraz metabolite<br>(N-2 4-Dimethylphenyl-<br>N'methylformamide)                                                        | C10H14N2          | 5.87  | 162.11570 | 12      | 1     | 100                                     |                      |                     |              |                                                    |            |                 |            |            |            |
| Anabasine                                                                                                                 | C10H14N2          | 4.60  | 162.11570 | 12      | 1     | 100                                     | 0                    | 0                   |              |                                                    |            |                 |            |            |            |
| Anilazine                                                                                                                 | C9H5Cl3N4         | 10.81 | 273.95798 | 11      | 96    | 100                                     |                      |                     |              |                                                    |            |                 |            |            |            |
| Anthraquinone                                                                                                             | C14H8O2           | 9.46  | 208.05243 | 16      | 2     | 0                                       | 100                  | 0                   |              |                                                    |            |                 |            |            |            |
| Asulam                                                                                                                    | C8H10N2O4S        | 5.30  | 230.03613 | 11      | 6     | 50                                      | 100                  | 50                  | 10           | C6H6O2NS                                           | 156.0114   |                 |            |            |            |
| Atrazine                                                                                                                  | C8H14ClN5         | 9.74  | 215.09377 | 11      | 32    | 100                                     | 0                    | 0                   | 10           | C5H9ClN5                                           | 174.0541   | C3H5N5Cl        | 146.0228   |            |            |
| Atrazine-desisopropyl                                                                                                     | C5H8ClN5          | 5.63  | 173.04682 | 7       | 32    | 100                                     |                      |                     |              |                                                    |            |                 |            |            |            |
| Azaconazole                                                                                                               | C12H11Cl2N3O2     | 9.75  | 299.02283 | 15      | 65    | 100                                     | 0                    | 0                   |              |                                                    |            |                 |            |            |            |
| Azadirachtin                                                                                                              | C35H44O16         | 9.25  | 720.26294 | 40      | 11    | 0                                       | 100                  | 95                  |              |                                                    |            |                 |            |            |            |
| Azamethiphos                                                                                                              | C9H10ClN2O5PS     | 8.52  | 323.97366 | 12      | 38    | 100                                     | 80                   | 30                  |              | C7H4ClN2O2                                         | 182.9956   | C5H3ClN         | 111.9949   |            |            |
| Azinphos-ethyl                                                                                                            | C12H16N3O3PS2     | 10.91 | 345.03707 | 16      | 11    | 100                                     | 15                   | 30                  |              | H2O2PS                                             | 96.9508    | C8H6NO          | 132.0444   |            |            |
| Azinphos-methyl                                                                                                           | C10H12N3O3PS2     | 9.98  | 317.00577 | 14      | 10    | 100                                     | 10                   | 80                  |              | C8H6N3O                                            | 160.0505   | C8H6NO          | 132.0444   |            |            |
| Aziprotryne                                                                                                               | C7H11N7S          | 10.90 | 225.07967 | 11      | 5     | 100                                     | 0                    | 0                   |              |                                                    |            |                 |            |            |            |
| Azolamide                                                                                                                 | C8H15N3O2         | 7.84  | 185.11643 | 10      | 1     | 100                                     | 2                    | 30                  |              |                                                    |            |                 |            |            |            |
| Azoxystrobin                                                                                                              | C22H17N3O5        | 9.95  | 403.11682 | 26      | 4     | 100                                     | 0                    | 5                   | 34           | C20H14N3O3                                         | 344.1030   | C21H14N3O4      | 372.0979   |            |            |
| Barban                                                                                                                    | C11H9Cl2NO2       | 10.61 | 257.00103 | 13      | 65    | 15                                      | 100                  | 20                  |              |                                                    |            |                 |            |            |            |
| Benalaxyl                                                                                                                 | C20H23NO3         | 11.56 | 325.16779 | 23      | 3     | 100                                     | 0                    | 1                   |              | C10H14N                                            | 148.1121   | C7H7            | 91.0542    |            |            |
| Benazolin                                                                                                                 | C9H6ClNO3S        | 8.23  | 242.97569 | 11      | 38    | 30                                      | 100                  | 25                  |              |                                                    |            |                 |            |            |            |
| Benazolin-ethyl                                                                                                           | C11H10ClNO3S      | 10.23 | 271.00699 | 14      | 38    | 100                                     | 16                   | 14                  |              |                                                    |            |                 |            |            |            |
| Bendiocarb                                                                                                                | C11H13NO4         | 8.70  | 223.08446 | 13      | 2     | 100                                     | 10                   | 2                   |              | C6H5O2                                             | 109.0284   | C9H11O3         | 167.0703   |            |            |
| Benodanil                                                                                                                 | C13H10INO         | 9.57  | 322.98071 | 15      | 1     | 100                                     | 20                   | 10                  |              |                                                    |            |                 |            |            |            |
| Bensulfuron-methyl                                                                                                        | C16H18N4O7S       | 9.94  | 410.08962 | 20      | 7     | 100                                     |                      | 25                  |              | C9H9O2                                             | 149.0597   | C7H8O3N3        | 182.0560   | C8H7O      | 119.0491   |
| Benthiavalicarb-isopropyl                                                                                                 | C18H24FN3O3S      | 10.52 | 381.15224 | 22      | 7     | 100                                     | 0                    | 10                  |              |                                                    |            |                 |            |            |            |
| Benzoximate                                                                                                               | C18H18ClNO5       | 11.65 | 363.08735 | 21      | 35    | 100                                     | 0                    | 0                   | 502          | C9H8ClO3                                           | 199.0156   |                 |            |            |            |
| Bifenazate                                                                                                                | C17H20N2O3        | 10.60 | 300.14739 | 20      | 2     | 100                                     | 0                    | 20                  | 54           | C12H10ON                                           | 184.0759   | C12H12N         | 170.0967   |            |            |
| Bifenox                                                                                                                   | C14H9Cl2NO5       | 11.81 | 340.98578 | 16      | 66    | 2                                       | 100                  | 15                  |              |                                                    |            |                 |            |            |            |
| Bioallethrin                                                                                                              | C19H26O3          | 12.75 | 302.18820 | 21      | 3     | 100                                     | 0                    | 10                  |              |                                                    |            |                 |            |            |            |
| Bioresmethrin                                                                                                             | C22H26O3          | 14.52 | 338.18820 | 25      | 3     | 100                                     | 1                    | 1                   |              |                                                    |            |                 |            |            |            |
| Bitertanol                                                                                                                | C20H23N3O2        | 11.56 | 337.17903 | 24      | 3     | 100                                     | 0                    | 30                  |              | C2H4N3                                             | 70.0400    |                 |            |            |            |
| Boscalid                                                                                                                  | C18H12Cl2N2O      | 10.30 | 342.03267 | 21      | 66    | 100                                     | 0                    | 3                   |              | C18H12Cl2N2O                                       | 307.0633   | C18H12[37Cl]N2O | 309.0587   | C6H3ClNO   | 139.9898   |

| Exactive pesticide screening database (Supplemental Information Mol et al, Analytical and Bioanalytical Chemistry (2012)) |                   |       |           |         |       |                                         |                      |                     |              |                                                    |            |                |            |            |            |
|---------------------------------------------------------------------------------------------------------------------------|-------------------|-------|-----------|---------|-------|-----------------------------------------|----------------------|---------------------|--------------|----------------------------------------------------|------------|----------------|------------|------------|------------|
| Analyte                                                                                                                   | Molecular formula | RT    | [M] (a)   | RIA (b) |       | Rel. abundance ESI <sup>+</sup> adducts |                      |                     | Fragment     | Fragments (Exactive Orbitrap using HCD cell 30 eV) |            |                |            |            |            |
|                                                                                                                           |                   | min   |           | [M+1]   | [M+2] | [M+H] <sup>+</sup>                      | [M+NH4] <sup>+</sup> | [M+Na] <sup>+</sup> | Rel. Int (c) | Fragment 1                                         | Fragment 1 | Fragment 2     | Fragment 2 | Fragment 3 | Fragment 3 |
| Brodifacoum I                                                                                                             | C31H23BrO3        | 13.06 | 522.08306 | 35      | 104   | 100                                     | 1                    | 10                  |              |                                                    |            |                |            |            |            |
| Brodifacoum II                                                                                                            | C31H23BrO3        | 13.21 | 522.08306 | 35      | 104   | 100                                     | 1                    | 10                  |              |                                                    |            |                |            |            |            |
| Bromacil                                                                                                                  | C9H13BrN2O2       | 8.86  | 260.01604 | 11      | 98    | 100                                     | 2                    | 1                   |              | C5H6BrN2O2                                         | 204.9607   | C5H6[81Br]N2O2 | 206.9587   |            |            |
| Bromfeninfos                                                                                                              | C12H14BrCl2O4P    | 11.65 | 401.91901 | 14      | 163   | 100                                     | 90                   | 10                  |              |                                                    |            |                |            |            |            |
| Bromuconazole I                                                                                                           | C13H12BrCl2N3O    | 11.36 | 374.95408 | 16      | 162   | 100                                     |                      |                     |              |                                                    |            |                |            |            |            |
| Bromuconazole II                                                                                                          | C13H12BrCl2N3O    | 10.74 | 374.95408 | 16      | 162   | 100                                     | 0                    | 0                   |              |                                                    |            |                |            |            |            |
| Buminaphos                                                                                                                | C18H38NO3P        | 15.90 | 347.25893 | 21      | 3     | 100                                     | 0                    | 2                   | 3            | C16H34ON                                           | 256.2635   |                |            |            |            |
| Bupirimate                                                                                                                | C13H24N4O3S       | 11.10 | 316.15691 | 17      | 6     | 100                                     | 0                    | 1                   |              | C8H12N3O                                           | 166.0975   | C4H2ON3        | 108.0192   | C11H20ON3  | 210.1603   |
| Buprofezin                                                                                                                | C16H23N3OS        | 12.66 | 305.15618 | 20      | 6     | 100                                     | 0                    | 1                   |              | C9H17N2OS                                          | 201.1056   | C5H10NS        | 116.0528   |            |            |
| Butocarboxim                                                                                                              | C7H14N2O2S        | 6.12  | 190.07760 | 10      | 5     | 0                                       | 100                  | 0                   |              | x                                                  |            |                |            |            |            |
| Butocarboxim-sulfoxide                                                                                                    | C7H14N2O3S        | 5.38  | 206.07251 | 10      | 5     | 100                                     | 5                    | 5                   |              | C4H9S                                              | 89.0419    |                |            |            |            |
| Butoxycarboxim                                                                                                            | C7H14N2O4S        | 5.64  | 222.06743 | 10      | 6     | 70                                      | 100                  | 20                  | 25           | C4H8ON                                             | 86.0600    |                |            |            |            |
| Butralin                                                                                                                  | C14H21N3O4        | 13.64 | 295.15321 | 17      | 2     | 100                                     | 0                    | 0                   |              | ?                                                  | 240.0968   | ?              | 222.0863   |            |            |
| Butylate                                                                                                                  | C11H23NOS         | 12.54 | 217.15004 | 14      | 5     | 100                                     | 0                    | 0                   |              |                                                    |            |                |            |            |            |
| Cadusafos                                                                                                                 | C10H23O2PS2       | 12.05 | 270.08771 | 13      | 10    | 100                                     | 0                    | 1                   |              | C2H8PO2S2                                          | 158.9698   | H2O2PS         | 96.9508    |            | 130.9385   |
| Carbaryl                                                                                                                  | C12H11NO2         | 8.98  | 201.07898 | 14      | 1     | 100                                     | 10                   | 1                   | 15           | C10H9O                                             | 145.0647   | C9H9           | 117.0699   | C11H7O     | 155.0491   |
| Carbendazim                                                                                                               | C9H9N3O2          | 7.70  | 191.06948 | 11      | 1     | 100                                     | 0                    | 1                   | 14           | C8H6N3O                                            | 160.0511   |                |            |            |            |
| Carbetamide                                                                                                               | C12H16N2O3        | 8.44  | 236.11609 | 14      | 1     | 25                                      | 0                    | 100                 | 11           | C7H6NO                                             | 120.0444   | C5H12NO2       | 118.0863   | C5H10NO    | 100.0757   |
| Carbofuran                                                                                                                | C12H15NO3         | 8.78  | 221.10519 | 14      | 1     | 100                                     | 1                    | 1                   | 43           | C10H13O2                                           | 165.0910   | C7H7O2         | 123.0441   |            |            |
| Carbofuran 3-hydroxy-                                                                                                     | C12H15NO4         | 7.10  | 237.10011 | 14      | 2     | 50                                      | 100                  | 10                  |              | C10H11O2                                           | 163.0753   |                |            |            |            |
| Carbofuran 3-keto-                                                                                                        | C12H13NO4         | 7.83  | 235.08446 | 14      | 2     | 100                                     | 0                    | 1                   |              |                                                    |            |                |            |            |            |
| Carbophenothion                                                                                                           | C11H16ClO2PS3     | 13.36 | 341.97386 | 15      | 47    | 100                                     | 0                    | 0                   |              |                                                    |            |                |            |            |            |
| Carbosulfan                                                                                                               | C20H32N2O3S       | 15.78 | 380.21337 | 24      | 8     | 100                                     | 0                    | 0                   |              | C5H12NS                                            | 118.0685   | C8H18N         | 128.1434   |            |            |
| Carboxin                                                                                                                  | C12H13NO2S        | 9.08  | 235.06670 | 15      | 6     | 100                                     | 0                    | 5                   |              | C6H7O2S                                            | 143.0161   |                |            |            |            |
| Carfentrazone-ethyl                                                                                                       | C15H14Cl2F3N3O3   | 11.28 | 411.03643 | 18      | 66    | 10                                      | 100                  | 10                  | 37           | C15H9Cl2F3                                         | 316.0028   | C13H8O2N3Cl2F2 | 345.9956   |            |            |
| Carpropamid                                                                                                               | C15H18Cl3NO       | 11.50 | 333.04540 | 17      | 97    | 100                                     | 0                    | 1                   | ND           | C6H7N2S                                            | 139.0324   |                |            |            |            |
| Carvone                                                                                                                   | C10H14O           | 10.13 | 150.10447 | 11      | 1     | 100                                     | 0                    | 0                   |              |                                                    |            |                |            |            |            |
| Chinomethionat                                                                                                            | C10H6N2OS2        | 13.02 | 233.99216 | 13      | 10    | 100                                     | 0                    | 1                   |              | C9H7N2S2                                           | 207.0043   | C8H7N2S        | 163.0325   |            |            |
| Chlorantraniliprole                                                                                                       | C18H14Cl2N5O2Br   | 9.85  | 480.97079 | 22      | 164   | 100                                     | 0                    | 50                  | ND           | C14H4BrCl                                          | 285.9179   |                |            |            |            |
| Chlorbromuron                                                                                                             | C9H10BrClN2O2     | 10.53 | 291.96142 | 11      | 130   | 100                                     | 3                    | 3                   |              |                                                    |            |                |            |            |            |
| Chlorbufam                                                                                                                | C11H10ClNO2       | 10.39 | 223.04001 | 13      | 33    | 50                                      | 100                  | 25                  |              |                                                    |            |                |            |            |            |
| Chlordimeform                                                                                                             | C10H13ClN2        | 6.13  | 196.07673 | 12      | 33    | 100                                     |                      |                     |              |                                                    |            |                |            |            |            |
| Chlorfenapyr                                                                                                              | C15H11BrClF3N2O   | 12.71 | 405.96954 | 17      | 131   | 100                                     | 1                    | 1                   |              |                                                    |            |                |            |            |            |
| Chlorfenson                                                                                                               | C12H8Cl2O3S       | 10.08 | 301.95712 | 14      | 70    | 100                                     |                      | 30                  |              |                                                    |            |                |            |            |            |
| Chlorfenvinphos                                                                                                           | C12H14Cl3O4P      | 11.42 | 357.96953 | 14      | 98    | 100                                     | 5                    | 1                   |              |                                                    |            |                |            |            |            |
| Chlorfluzaron                                                                                                             | C20H9Cl3F5N3O3    | 13.71 | 538.96297 | 23      | 99    | 100                                     | 30                   | 50                  |              | C7H6F2NO                                           | 158.0412   | C7H3F2O        | 141.0146   |            |            |
| Chloridazon                                                                                                               | C10H8ClN3O        | 7.41  | 221.03559 | 12      | 33    | 100                                     |                      | 10                  |              | C7H6N                                              | 104.0495   |                |            |            |            |
| Chlormephos                                                                                                               | C5H12ClO2PS2      | 9.65  | 233.97049 | 7       | 42    | 100                                     | 30                   | 30                  |              |                                                    |            |                |            |            |            |
| Chlorotoluron                                                                                                             | C10H13ClN2O       | 9.53  | 212.07164 | 12      | 33    | 100                                     | 0                    | 1                   | 4            | C6H9N2                                             | 109.0760   |                |            |            |            |
| Chloroxuron                                                                                                               | C15H15ClN2O2      | 10.71 | 290.08221 | 18      | 34    | 100                                     | 0                    | 1                   | 36           | C3H6NO                                             | 72.0444    |                |            |            |            |
| Chlorpropham                                                                                                              | C10H12ClNO2       | 10.68 | 213.05566 | 12      | 33    | 100                                     |                      |                     |              |                                                    |            |                |            |            |            |
| Chlorpropham metabolite (HSA 4-)                                                                                          | C10H12ClNO6S      | 8.49  | 309.00739 | 13      | 38    | 5                                       | 100                  | 10                  |              |                                                    |            |                |            |            |            |
| Chlorpyrifos                                                                                                              | C9H11Cl3NO3PS     | 13.11 | 348.92629 | 11      | 102   | 100                                     | 0                    | 0                   | 30           | C5H3Cl3NO                                          | 197.9275   |                |            |            |            |
| Chlorpyrifos-methyl                                                                                                       | C7H7Cl3NO3PS      | 11.98 | 320.89499 | 9       | 101   | 100                                     | 0                    | 0                   |              |                                                    |            |                |            |            |            |
| Chlorsulfuron                                                                                                             | C12H12ClN5O4S     | 8.26  | 357.02985 | 16      | 38    | 100                                     | 0                    | 10                  | 82           | C5H9N4O                                            | 141.0771   | C6H7O2N4       | 167.0564   |            |            |
| Chlorthiamid                                                                                                              | C7H5Cl2NS         | 7.77  | 204.95198 | 9       | 69    | 100                                     | 0                    | 0                   |              | C7H3ClS                                            | 153.9639   |                |            |            |            |
| Chlorthiophos                                                                                                             | C11H15Cl2O3PS2    | 13.37 | 359.95773 | 14      | 74    | 100                                     |                      |                     |              | C710Cl2O3PS2                                       | 304.9024   |                |            |            |            |

| Exactive pesticide screening database (Supplemental Information Mol et al, Analytical and Bioanalytical Chemistry (2012)) |                   |       |           |         |       |                                         |                      |                     |              |                                                    |            |                |            |            |            |
|---------------------------------------------------------------------------------------------------------------------------|-------------------|-------|-----------|---------|-------|-----------------------------------------|----------------------|---------------------|--------------|----------------------------------------------------|------------|----------------|------------|------------|------------|
| Analyte                                                                                                                   | Molecular formula | RT    | [M] (a)   | RIA (b) |       | Rel. abundance ESI <sup>+</sup> adducts |                      |                     | Fragment     | Fragments (Exactive Orbitrap using HCD cell 30 eV) |            |                |            |            |            |
|                                                                                                                           |                   | min   |           | [M+1]   | [M+2] | [M+H] <sup>+</sup>                      | [M+NH4] <sup>+</sup> | [M+Na] <sup>+</sup> | Rel. Int (c) | Fragment 1                                         | Fragment 1 | Fragment 2     | Fragment 2 | Fragment 3 | Fragment 3 |
| Chromafenozide                                                                                                            | C24H30N2O3        | 10.80 | 394.22564 | 28      | 4     | 100                                     | 0                    | 10                  | 184          | C11H11O2                                           | 175.0754   |                |            |            |            |
| Cinerin I                                                                                                                 | C20H28O3          | 13.49 | 316.20385 | 22      | 3     | 100                                     | 20                   | 15                  |              |                                                    |            |                |            |            |            |
| Cinerin II                                                                                                                | C21H28O5          | 11.94 | 360.19367 | 24      | 4     | 100                                     | 50                   | 15                  |              |                                                    |            |                |            |            |            |
| Cinidon-ethyl                                                                                                             | C19H17Cl2NO4      | 12.67 | 393.05346 | 22      | 67    | 90                                      | 90                   | 100                 |              | C17H12Cl2NO3                                       | 348.0189   |                |            |            |            |
| Clethodim                                                                                                                 | C17H26ClNO3S      | 11.98 | 359.13219 | 20      | 39    | 100                                     | 0                    | 20                  | 32           | C9H10NO2                                           | 164.0706   |                |            |            |            |
| Clethodim                                                                                                                 | C17H26ClNO3S      | 10.38 | 359.13219 | 20      | 39    | 100                                     | 0                    | 20                  |              | C9H10NO2                                           | 164.0706   |                |            |            |            |
| Climbazole                                                                                                                | C15H17ClN2O2      | 10.79 | 292.09786 | 18      | 34    | 100                                     | 0                    | 0                   | 7            | C17H20O2N                                          | 270.1489   | C15H18O2N      | 244.1332   |            |            |
| Clodinafop-propargyl                                                                                                      | C17H13ClFNO4      | 11.18 | 349.05171 | 19      | 35    | 100                                     | 5                    | 10                  |              | C13H10ClFNO2                                       | 266.0379   | C6H3O          | 91.0178    |            |            |
| Clofentezine                                                                                                              | C14H8Cl2N4        | 11.73 | 302.01260 | 17      | 65    | 100                                     | 0                    | 0                   |              | C7H5ClN                                            | 138.0105   |                |            |            |            |
| Clomazone                                                                                                                 | C12H14ClNO2       | 10.11 | 239.07131 | 14      | 33    | 100                                     | 1                    | 1                   | 111          | C7H6Cl                                             | 125.0153   | C7H6[37]Cl     | 127.0123   |            |            |
| Clopyralid                                                                                                                | G6H3Cl2NO2        | 5.61  | 190.95408 | 7       | 65    | 100                                     | 0                    | 0                   |              |                                                    |            |                |            |            |            |
| Cloquintocet-mexyl                                                                                                        | C18H22ClNO3       | 12.76 | 335.12882 | 21      | 35    | 100                                     | 0                    | 5                   | 33           | C10H7ClNO                                          | 192.0211   | C11H9ClNO3     | 238.0266   |            |            |
| Clothianidin                                                                                                              | C6H8ClN5O2S       | 6.91  | 249.00872 | 9       | 37    | 100                                     | 1                    | 8                   | 28           | C4H3NClS                                           | 131.9669   |                |            |            |            |
| Coumaphos                                                                                                                 | C14H16ClO5PS      | 11.56 | 362.01446 | 17      | 39    | 100                                     | 5                    | 10                  |              | C10H8ClO2S                                         | 226.9928   | C10H9ClO5PS    | 306.9591   |            |            |
| Crimidine                                                                                                                 | C7H10ClN3         | 8.33  | 171.05633 | 9       | 32    | 100                                     |                      | 1                   |              |                                                    |            |                |            |            |            |
| Crufomate                                                                                                                 | C12H19ClNO3P      | 11.21 | 291.07911 | 14      | 33    | 100                                     | 1                    | 1                   |              |                                                    |            |                |            |            |            |
| Cyanazine                                                                                                                 | C9H13ClN6         | 8.59  | 240.08902 | 12      | 32    | 100                                     | 0                    | 10                  | 12           | C8H13N5Cl                                          | 214.0854   | C8H13N5[37]Cl  | 216.0824   |            |            |
| Cyanofenphos                                                                                                              | C15H14NO2PS       | 11.32 | 303.04829 | 18      | 6     | 100                                     | 0                    | 0                   |              | C6H6OPS                                            | 156.9872   | C7H4N          | 102.0338   |            |            |
| Cyazofamid                                                                                                                | C13H13ClN4O2S     | 10.98 | 324.04478 | 17      | 38    | 100                                     | 0                    | 1                   |              | C2H6NO2S                                           | 108.0114   |                |            |            |            |
| Cyclanilide                                                                                                               | C11H9Cl2NO3       | 9.41  | 272.99595 | 13      | 65    | 1                                       | 100                  | 0                   |              | C6H3NCl                                            | 123.9949   |                |            |            |            |
| Cycloate                                                                                                                  | C11H21NOS         | 12.22 | 215.13439 | 14      | 5     | 100                                     | 0                    | 0                   |              | C5H12NOS                                           | 134.0634   | C9H16NO        | 154.1226   |            |            |
| Cycloxydim                                                                                                                | C17H27NO3S        | 12.46 | 325.17117 | 20      | 7     | 100                                     | 0                    | 3                   | 13           | C10H14NO2                                          | 180.1019   | C4H6O          | 70.0413    |            |            |
| Cyfluthrin                                                                                                                | C22H18Cl2FNO3     | 13.38 | 433.06478 | 25      | 67    | 0                                       | 100                  | 20                  |              | C8H9Cl2O                                           | 191.0025   | C7H8Cl         | 127.0309   |            |            |
| Cyhalothrin (Lambda)                                                                                                      | C23H19ClF3NO3     | 13.19 | 449.10056 | 26      | 36    | 0                                       | 90                   | 100                 |              | C9H9ClF3O                                          | 225.0289   | C4H9O2         | 89.0597    |            |            |
| Cymiazole                                                                                                                 | C12H14N2S         | 9.85  | 218.08777 | 15      | 5     | 100                                     | 0                    | 0                   |              |                                                    |            |                |            |            |            |
| Cymoxanil                                                                                                                 | C7H10N4O3         | 7.68  | 198.07529 | 9       | 1     | 40                                      | 5                    | 100                 | 2            | C4H6N3O2                                           | 128.0455   |                |            |            |            |
| Cypermethrin                                                                                                              | C22H19Cl2NO3      | 13.73 | 415.07420 | 25      | 67    | 5                                       | 100                  | 25                  |              | C8H9Cl2O                                           | 191.0025   | C7H8Cl         | 127.0309   |            |            |
| Cyphenothrin cis-                                                                                                         | C24H25NO3         | 13.91 | 375.18344 | 27      | 4     | 0                                       | 100                  | 0                   |              |                                                    |            |                |            |            |            |
| Cyproconazole                                                                                                             | C15H18ClN3O       | 10.65 | 291.11384 | 18      | 34    | 100                                     | 0                    | 0                   |              | C7H6Cl                                             | 125.0153   | C2H4N3         | 70.0401    | C7H6[37]Cl | 127.0123   |
| Cyprodinil                                                                                                                | C14H15N3          | 11.59 | 225.12660 | 17      | 1     | 100                                     | 0                    | 0                   |              | C7H10N                                             | 108.0810   |                |            |            |            |
| Cyprofuram                                                                                                                | C14H14ClNO3       | 9.19  | 279.06622 | 16      | 34    | 100                                     | 1                    | 1                   |              |                                                    |            |                |            |            |            |
| Cyromazine                                                                                                                | C6H10N6           | 4.62  | 166.09669 | 9       | 0     | 100                                     |                      |                     |              | C2H5N4                                             | 85.0509    |                |            |            |            |
| Cythioate                                                                                                                 | C8H12NO5PS2       | 7.81  | 296.98945 | 11      | 10    | 80                                      | 100                  | 50                  |              | x                                                  |            |                |            |            |            |
| Daminozide                                                                                                                | C6H12N2O3         | 4.65  | 160.08479 | 8       | 1     | 100                                     |                      |                     |              |                                                    |            |                |            |            |            |
| Dazomet                                                                                                                   | C5H10N2S2         | 5.99  | 162.02854 | 8       | 9     | 100                                     | 0                    | 0                   |              |                                                    |            |                |            |            |            |
| Deltamethrin                                                                                                              | C22H19Br2NO3      | 13.72 | 502.97317 | 25      | 198   | 0                                       | 100                  | 0                   |              | C8H9OBr2                                           | 278.9015   | C8H9[81]BrBrO  | 280.8994   |            |            |
| Demeton-o                                                                                                                 | C8H19O3PS2        | 10.12 | 258.05133 | 11      | 10    | 100                                     | 0                    | 10                  |              |                                                    |            |                |            |            |            |
| Demeton-o-sulfoxide                                                                                                       |                   |       |           |         |       |                                         |                      |                     |              |                                                    |            |                |            |            |            |
| Metabolite                                                                                                                | C8H19O4PS2        | 8.61  | 274.04624 | 11      | 10    | 100                                     | 1                    | 1                   |              |                                                    |            |                |            |            |            |
| Demeton-s                                                                                                                 | C8H19O3PS2        | 10.13 | 258.05133 | 11      | 10    | 100                                     | 0                    | 10                  |              |                                                    |            |                |            |            |            |
| Demeton-s-Methyl                                                                                                          | C6H15O3PS2        | 8.86  | 230.02003 | 9       | 10    | 100                                     | 0                    | 50                  |              |                                                    |            |                |            |            |            |
| Demeton-s-methyl sulfone                                                                                                  | C6H15O5PS2        | 6.05  | 262.00985 | 9       | 10    | 100                                     | 10                   | 10                  |              | C4H10O3PS                                          | 169.0083   | C2H8O4P        | 127.0155   |            |            |
| Desmedipham                                                                                                               | C16H16N2O4        | 6.10  | 300.11101 | 19      | 2     | 100                                     | 30                   | 0                   |              |                                                    |            |                |            |            |            |
| Desmetryn                                                                                                                 | C8H15N5S          | 9.68  | 213.10482 | 12      | 5     | 100                                     | 0                    | 0                   |              | C5H10N5S                                           | 172.0651   |                |            |            |            |
| Diafenthiuron                                                                                                             | C23H32N2O5        | 13.46 | 384.22354 | 27      | 8     | 100                                     | 0                    | 2                   | 29           | C19H25ON2S                                         | 329.1682   | C16H19ON2S     | 287.1210   |            |            |
| Dialifos                                                                                                                  | C14H17ClNO4PS2    | 11.85 | 393.00252 | 18      | 43    | 100                                     | 40                   | 20                  |              | C10H7ClNO2                                         | 208.1060   | C10H7[37]ClNO2 | 210.0130   |            |            |
| Diallate                                                                                                                  | C10H17Cl2NOS      | 12.22 | 269.04079 | 12      | 69    | 100                                     |                      |                     |              | C4H8NO                                             | 86.0600    |                |            |            |            |

| Exactive pesticide screening database (Supplemental Information Mol et al, Analytical and Bioanalytical Chemistry (2012)) |                   |       |           |         |       |                                         |                      |                     |              |                                                    |            |                  |            |                   |            |
|---------------------------------------------------------------------------------------------------------------------------|-------------------|-------|-----------|---------|-------|-----------------------------------------|----------------------|---------------------|--------------|----------------------------------------------------|------------|------------------|------------|-------------------|------------|
| Analyte                                                                                                                   | Molecular formula | RT    | [M] (a)   | RIA (b) |       | Rel. abundance ESI <sup>+</sup> adducts |                      |                     | Fragment     | Fragments (Exactive Orbitrap using HCD cell 30 eV) |            |                  |            |                   |            |
|                                                                                                                           |                   | min   |           | [M+1]   | [M+2] | [M+H] <sup>+</sup>                      | [M+NH4] <sup>+</sup> | [M+Na] <sup>+</sup> | Rel. Int (c) | Fragment 1                                         | Fragment 1 | Fragment 2       | Fragment 2 | Fragment 3        | Fragment 3 |
| Diazinon                                                                                                                  | C12H21N2O3PS      | 11.61 | 304.10105 | 15      | 6     | 100                                     | 0                    | 0                   | 38           | C8H13N2S                                           | 169.0794   | C8H13N2O         | 153.1021   |                   |            |
| Dicamba                                                                                                                   | C8H6Cl2O3         | 7.95  | 219.96940 | 9       | 65    | 5                                       | 100                  | 30                  |              |                                                    |            |                  |            |                   |            |
| Dichlofenthion                                                                                                            | C10H13Cl2O3PS     | 11.67 | 313.97001 | 12      | 70    | 100                                     | 0                    | 0                   |              |                                                    |            |                  |            |                   |            |
| Dichlofluanid                                                                                                             | C9H11Cl2FN2O2S2   | 10.77 | 331.96231 | 12      | 74    | 100                                     | 80                   | 0                   |              | C7H5Cl2FNS                                         | 223.9498   | C6H5NS           | 123.0137   |                   |            |
| Dichlofluanid metabolite (DMSA)                                                                                           | C8H12N2O2S        | 8.06  | 200.06195 | 11      | 5     | 100                                     | 0                    | 5                   |              |                                                    |            |                  |            |                   |            |
| Dichlorvos                                                                                                                | C4H7Cl2O4P        | 8.68  | 219.94590 | 5       | 65    | 100                                     | 10                   |                     |              | C2H8O4P                                            | 127.0155   | C2H6O3P          | 109.0049   |                   |            |
| Diclobutrazol                                                                                                             | C15H19Cl2N3O      | 11.39 | 327.09052 | 18      | 65    | 100                                     | 0                    | 0                   |              | C7H5Cl2                                            | 158.9763   |                  |            |                   |            |
| Diclofop-methyl                                                                                                           | C16H14Cl2O4       | 12.48 | 340.02691 | 18      | 66    | 3                                       | 100                  | 40                  |              | C14H11Cl2O2                                        | 281.0131   | C14H11[37]ClClO2 | 283.0101   |                   |            |
| Dicrotophos                                                                                                               | C8H16NO5P         | 6.40  | 237.07661 | 10      | 1     | 100                                     | 3                    | 1                   |              | C2H8PO4                                            | 127.0155   | C6H10NO          | 112.0757   |                   |            |
| Diethyl-ethyl                                                                                                             | C16H22ClNO3       | 11.37 | 311.12882 | 18      | 34    | 100                                     | 30                   | 7                   |              |                                                    |            |                  |            |                   |            |
| Diethofencarb                                                                                                             | C14H21NO4         | 10.24 | 267.14706 | 16      | 2     | 100                                     | 1                    | 20                  |              | C10H14NO2                                          | 180.1019   | C8H10O2N         | 152.0706   |                   |            |
| Diethyltoluamide                                                                                                          | C12H17NO          | 9.81  | 191.13101 | 14      | 1     | 100                                     |                      | 1                   |              |                                                    |            |                  |            |                   |            |
| Difenacoum I                                                                                                              | C31H24O3          | 12.10 | 444.17255 | 35      | 6     | 100                                     | 1                    | 5                   |              |                                                    |            |                  |            |                   |            |
| Difenacoum II                                                                                                             | C31H24O3          | 12.08 | 444.17255 | 35      | 6     | 100                                     | 1                    | 5                   |              |                                                    |            |                  |            |                   |            |
| Difenoconazole                                                                                                            | C19H17Cl2N3O3     | 11.84 | 405.06470 | 22      | 67    | 100                                     | 0                    | 5                   | 75           | C13H9Cl2O                                          | 251.0025   | C13H9Cl[37Cl]O   | 252.9996   |                   |            |
| Difenoxuron                                                                                                               | C16H18N2O3        | 9.65  | 286.13174 | 19      | 2     | 100                                     | 0                    | 5                   | 19           | C7H7O2                                             | 123.0441   |                  |            |                   |            |
| Diiflubenzuron                                                                                                            | C14H9ClF2N2O2     | 11.13 | 310.03206 | 16      | 34    | 90                                      | 0                    | 100                 |              | C7H6NOF2                                           | 158.0412   | C7H3F2O          | 141.0146   |                   |            |
| Diiflufenican                                                                                                             | C19H11F5N2O2      | 11.88 | 394.07407 | 22      | 3     | 100                                     | 0                    | 0                   | 62           | C13H7F3NO2                                         | 266.0423   |                  |            |                   |            |
| Dikegulac                                                                                                                 | C12H18O7          | 7.45  | 274.10525 | 14      | 2     | 5                                       | 100                  | 10                  |              |                                                    |            |                  |            |                   |            |
| Dimefox                                                                                                                   | C4H12FN2OP        | 6.85  | 154.06713 | 5       | 0     | 100                                     | 20                   | 1                   |              |                                                    |            |                  |            |                   |            |
| Dimefuron                                                                                                                 | C15H19ClN4O3      | 9.95  | 338.11457 | 18      | 34    | 100                                     | 50                   | 15                  |              |                                                    |            |                  |            |                   |            |
| Dimethachlor                                                                                                              | C13H18ClNO2       | 9.98  | 255.10261 | 15      | 33    | 100                                     | 0                    | 1                   |              | C12H15ClNO                                         | 224.0837   | C12H15[37Cl]ClNO | 226.0807   | C10H14N           | 148.1121   |
| Dimethenamid                                                                                                              | C12H18ClNO2S      | 10.51 | 275.07468 | 15      | 38    | 100                                     | 0                    | 1                   |              | C11H15ClNOS                                        | 244.0557   | C9H14NS          | 168.0841   | C11H15[37Cl]ClNOS | 246.0528   |
| Dimethirimol                                                                                                              | C11H19N3O         | 9.59  | 209.15281 | 14      | 1     | 100                                     | 0                    | 1                   | 12           | C8H14ON                                            | 140.1070   | C3H7N2           | 71.0604    |                   |            |
| Dimethoate                                                                                                                | C5H12NO3PS2       | 7.30  | 228.99962 | 8       | 10    | 100                                     | 1                    | 5                   | 21           | C2H6O2PS                                           | 124.9821   | C3H8O2PS2        | 170.9698   | C4H8O3PS2         | 198.9647   |
| Dimethomorph I                                                                                                            | C21H22ClNO4       | 10.17 | 387.12374 | 24      | 35    | 100                                     | 0                    | 15                  | 62           | C17H14O3Cl                                         | 301.0626   | C17H14O3[37]Cl   | 303.0597   | C9H9O3            | 165.0546   |
| Dimethomorph II                                                                                                           | C21H22ClNO4       | 10.41 | 387.12374 | 24      | 35    | 100                                     | 0                    | 15                  | 62           | C17H14O3Cl                                         | 301.0626   | C17H14O3[37]Cl   | 303.0597   | C9H9O3            | 165.0546   |
| Dimethylvinphos                                                                                                           | C10H10Cl3O4P      | 10.67 | 329.93823 | 11      | 97    | 100                                     | 10                   | 1                   |              |                                                    |            |                  |            |                   |            |
| Dimoxystrobin                                                                                                             | C19H22N2O3        | 11.24 | 326.16304 | 22      | 3     | 100                                     | 0                    | 1                   |              |                                                    |            |                  |            |                   |            |
| Diniconazole                                                                                                              | C15H17Cl2N3O      | 11.95 | 325.07487 | 18      | 65    | 100                                     | 0                    | 0                   |              | C2H4N3                                             | 70.0400    |                  |            |                   |            |
| Dinitramine                                                                                                               | C11H13F3N4O4      | 11.71 | 322.08889 | 14      | 2     | 100                                     | 0                    | 0                   |              |                                                    |            |                  |            |                   |            |
| Dinoseb                                                                                                                   | C10H12N2O5        | 6.74  | 240.07462 | 12      | 2     | 0                                       | 0                    | 100                 |              | C10H7O3N2                                          | 203.0451   |                  |            |                   |            |
| Dinotefuran                                                                                                               | C7H14N4O3         | 5.71  | 202.10659 | 9       | 1     | 100                                     | 5                    | 10                  |              |                                                    |            |                  |            |                   |            |
| Diphacinone                                                                                                               | C23H16O3          | 9.91  | 340.10994 | 26      | 4     | 100                                     | 0                    | 0                   |              |                                                    |            |                  |            |                   |            |
| Diphenamid                                                                                                                | C16H17NO          | 9.83  | 239.13101 | 18      | 2     | 100                                     | 0                    | 1                   |              |                                                    |            |                  |            |                   |            |
| Diphenylamine                                                                                                             | C12H11N           | 10.80 | 169.08915 | 14      | 1     | 100                                     | 0                    | 0                   |              | C6H7N                                              | 93.0573    |                  |            |                   |            |
| Disulfoton                                                                                                                | C8H19O2PS3        | 11.92 | 274.02848 | 12      | 14    | 100                                     | 3                    | 5                   |              |                                                    |            |                  |            |                   |            |
| Disulfoton-sulfone                                                                                                        | C8H19O4PS3        | 9.40  | 306.01831 | 12      | 15    | 100                                     | 20                   | 7                   |              | x                                                  |            |                  |            |                   |            |
| Disulfoton-sulfoxide                                                                                                      | C8H19O3PS3        | 9.34  | 290.02340 | 12      | 15    | 100                                     | 0                    | 2                   | 4            | C4H10O2PS2                                         | 184.9854   |                  |            |                   |            |
| Ditalimfos                                                                                                                | C12H14NO4PS       | 10.92 | 299.03812 | 15      | 6     | 100                                     | 5                    | 5                   |              |                                                    | 130.0283   |                  | 243.9816   |                   |            |
| Diuron                                                                                                                    | C9H10Cl2N2O       | 9.88  | 232.01702 | 11      | 65    | 100                                     | 0                    | 1                   | 10           | C3H6NO                                             | 72.0444    |                  |            |                   |            |
| Dodemorph                                                                                                                 | C18H35NO          | 11.01 | 281.27187 | 21      | 2     | 100                                     | 0                    | 0                   |              | C6H14NO                                            | 116.1070   | C6H12N           | 98.0964    |                   |            |
| Dodine                                                                                                                    | C15H33N3O2        | 10.82 | 287.25728 | 18      | 2     | 100                                     | 0                    | 1                   |              | x                                                  |            |                  |            |                   |            |
| Edifenphos                                                                                                                | C14H15O2PS2       | 11.46 | 310.02511 | 17      | 11    | 100                                     | 1                    | 1                   |              | C12H12O2PS2                                        | 283.0011   | C6H5S            | 109.0106   |                   |            |
| Emamectin B1a                                                                                                             | C49H75NO13        | 11.66 | 885.52384 | 56      | 17    | 100                                     | 0                    | 0                   | 56           | C8H16O2N                                           | 158.1176   | C19H42O2N        | 316.3210   |                   |            |
| Emamectin B1b                                                                                                             | C48H73NO13        | 11.39 | 871.50819 | 55      | 16    | 0                                       | 100                  | 0                   |              | x                                                  |            |                  |            |                   |            |
| EPN                                                                                                                       | C14H14NO4PS       | 11.92 | 323.03812 | 17      | 7     | 0                                       | 100                  | 0                   |              | C6H6POS                                            | 156.9871   | C12H11NO4PS      | 296.0141   |                   |            |

| Exactive pesticide screening database (Supplemental Information Mol et al, Analytical and Bioanalytical Chemistry (2012)) |                   |       |           |         |       |                                         |                      |                     |              |                                                    |            |              |            |            |            |
|---------------------------------------------------------------------------------------------------------------------------|-------------------|-------|-----------|---------|-------|-----------------------------------------|----------------------|---------------------|--------------|----------------------------------------------------|------------|--------------|------------|------------|------------|
| Analyte                                                                                                                   | Molecular formula | RT    | [M] (a)   | RIA (b) |       | Rel. abundance ESI <sup>+</sup> adducts |                      |                     | Fragment     | Fragments (Exactive Orbitrap using HCD cell 30 eV) |            |              |            |            |            |
|                                                                                                                           |                   | min   |           | [M+1]   | [M+2] | [M+H] <sup>+</sup>                      | [M+NH4] <sup>+</sup> | [M+Na] <sup>+</sup> | Rel. Int (c) | Fragment 1                                         | Fragment 1 | Fragment 2   | Fragment 2 | Fragment 3 | Fragment 3 |
| Epoxiconazole                                                                                                             | C17H13ClFN3O      | 10.99 | 329.07312 | 20      | 34    | 100                                     | 0                    | 0                   |              | C8H6F                                              | 121.0448   |              |            |            |            |
| EPTC                                                                                                                      | C9H19NOS          | 11.44 | 189.11874 | 11      | 5     | 100                                     | 0                    | 0                   |              | C7H14NO                                            | 128.1070   | C8H20NS      | 162.1311   | C4H8NO     | 86.0600    |
| Esfenvalerate                                                                                                             | C25H22ClNO3       | 13.88 | 419.12882 | 28      | 36    | 0                                       | 100                  | 20                  |              |                                                    |            |              |            |            |            |
| Etaconazole                                                                                                               | C14H15Cl2N3O2     | 10.94 | 327.05413 | 17      | 66    | 100                                     | 0                    | 1                   |              |                                                    |            |              |            |            |            |
| Ethiofencarb                                                                                                              | C11H15NO2S        | 9.31  | 225.08235 | 14      | 6     | 100                                     | 15                   | 0                   | 109          | C7H7O                                              | 107.0491   |              |            |            |            |
| Ethiofencarb-sulfone                                                                                                      | C11H15NO4S        | 6.60  | 257.07218 | 14      | 6     | 100                                     | 50                   | 10                  | 380          | C7H7O                                              | 107.0491   |              |            |            |            |
| Ethiofencarb-sulfoxide                                                                                                    | C11H15NO3S        | 6.67  | 241.07727 | 14      | 6     | 100                                     | 1                    | 5                   | 138          | C9H13O2S                                           | 185.0631   | C7H7O        | 107.0491   |            |            |
| Ethion                                                                                                                    | C9H22O4P2S4       | 12.78 | 383.98762 | 14      | 19    | 100                                     | 1                    | 1                   |              | C3H8O3PS                                           | 142.9926   | C3H8O2PS2    | 170.9698   |            |            |
| Ethiprole                                                                                                                 | C13H9Cl2F3N4OS    | 10.29 | 395.98262 | 17      | 70    | 100                                     | 0                    | 1                   |              | X                                                  |            |              |            |            |            |
| Ethirimol                                                                                                                 | C11H19N3O         | 9.85  | 209.15281 | 14      | 1     | 100                                     | 1                    | 2                   | 14           | C8H14NO                                            | 140.1070   |              |            |            |            |
| Ethofumesate                                                                                                              | C13H18O5S         | 10.21 | 286.08750 | 16      | 7     | 20                                      | 100                  | 10                  |              | C8H9O                                              | 121.0648   | C6H9O3S      | 161.0267   |            |            |
| Ethoprophos                                                                                                               | C8H19O2PS2        | 11.04 | 242.05641 | 11      | 10    | 100                                     | 0                    | 1                   |              | H4PO2S2                                            | 130.9385   | H2PO2S       | 96.9508    |            |            |
| Ethoxyquin                                                                                                                | C14H19NO          | 10.87 | 217.14666 | 16      | 1     | 100                                     | 0                    | 0                   |              | C11H12ON                                           | 174.0913   | C13H16NO     | 202.1226   |            |            |
| Etofenprox                                                                                                                | C25H28O3          | 16.33 | 376.20385 | 28      | 4     | 0                                       | 100                  | 1                   |              |                                                    |            |              |            |            |            |
| Etoxazole                                                                                                                 | C21H23F2NO2       | 13.35 | 359.16969 | 24      | 3     | 100                                     | 0                    | 1                   |              | C7H3F2O                                            | 141.0146   |              |            |            |            |
| Etrimefos                                                                                                                 | C10H17N2O4PS      | 11.51 | 292.06467 | 13      | 6     | 100                                     | 0                    | 10                  |              |                                                    |            |              |            |            |            |
| Famoxadone                                                                                                                | C22H18N2O4        | 11.31 | 374.12666 | 25      | 4     | 5                                       | 10                   | 100                 |              |                                                    |            |              |            |            |            |
| Fenamidone                                                                                                                | C17H17N3OS        | 10.25 | 311.10923 | 21      | 6     | 100                                     | 0                    | 10                  |              | C6H6N                                              | 92.0495    | C15H13N3     | 236.1182   |            |            |
| Fenamiphos                                                                                                                | C13H22NO3PS       | 11.06 | 303.10580 | 16      | 6     | 100                                     | 0                    | 1                   |              |                                                    |            |              |            |            |            |
| Fenamiphos-sulfone                                                                                                        | C13H22NO5PS       | 8.75  | 335.09563 | 16      | 7     | 100                                     | 15                   | 5                   |              | C8H13O5NPS                                         | 266.0247   | C7H11O3NP    | 188.0471   |            |            |
| Fenamiphos-sulfoxide                                                                                                      | C13H22NO4PS       | 8.62  | 319.10072 | 16      | 6     | 100                                     | 5                    | 5                   | 18           | C8H11O2S                                           | 171.0474   | C8H10O4PS    | 233.0032   | C8H13O4NPS | 250.0297   |
| Fenarimol                                                                                                                 | C17H12Cl2N2O      | 10.90 | 330.03267 | 20      | 66    | 100                                     | 0                    | 0                   |              | C16H11ClNO                                         | 268.0524   | C15H9Cl2     | 259.0076   |            |            |
| Fenazaquin                                                                                                                | C20H22N2O         | 14.62 | 306.17321 | 23      | 3     | 100                                     | 0                    | 0                   |              | C12H17                                             | 161.1325   | C8H7N2O      | 147.0553   |            |            |
| Fenbuconazole                                                                                                             | C19H17ClN4        | 10.98 | 336.11417 | 23      | 34    | 100                                     | 0                    | 0                   |              |                                                    |            |              |            |            |            |
| Fenchlorazole-ethyl                                                                                                       | C12H8Cl5N3O2      | 11.69 | 400.90592 | 15      | 161   | 100                                     | 20                   | 10                  | 113          | C8H5O2NCl                                          | 182.0003   | C10H5O2N3Cl5 | 375.8789   |            |            |
| Fenchlorphos-oxon                                                                                                         | C8H8Cl3O4P        | 11.03 | 303.92258 | 9       | 97    | 50                                      | 100                  | 10                  |              |                                                    |            |              |            |            |            |
| Fenfuram                                                                                                                  | C12H11NO2         | 9.27  | 201.07898 | 14      | 1     | 100                                     | 0                    | 1                   |              | C6H5O2                                             | 109.0284   |              |            |            |            |
| Fenhexamid                                                                                                                | C14H17Cl2NO2      | 10.88 | 301.06363 | 16      | 66    | 100                                     | 0                    | 1                   | 100          | C7H13                                              | 97.1012    |              |            |            |            |
| Fenitrothion                                                                                                              | C9H12NO5PS        | 10.37 | 277.01738 | 11      | 6     | 100                                     | 0                    | 0                   |              | C3H10O3P                                           | 125.0362   |              |            |            |            |
| Fenobucarb                                                                                                                | C12H17NO2         | 10.15 | 207.12593 | 14      | 1     | 100                                     | 5                    | 1                   |              | C6H7O                                              | 95.0491    |              |            |            |            |
| Fenoxaprop-p-ethyl                                                                                                        | C18H16ClNO5       | 12.33 | 361.07170 | 21      | 35    | 100                                     | 0                    | 1                   | 23           | C15H11ClNO3                                        | 288.0422   |              |            |            |            |
| Fenoxycarb                                                                                                                | C17H19NO4         | 11.09 | 301.13141 | 19      | 3     | 100                                     | 0                    | 10                  | 61           | C3H6NO2                                            | 88.0393    | C5H10O2N     | 116.0706   |            |            |
| Fenpiclonil                                                                                                               | C11H6Cl2N2        | 9.90  | 235.99080 | 13      | 65    | 10                                      | 100                  | 10                  |              |                                                    |            |              |            |            |            |
| Fenpropathrin                                                                                                             | C22H23NO3         | 13.29 | 349.16779 | 25      | 3     | 100                                     | 100                  | 60                  |              |                                                    |            |              |            |            |            |
| Fenpropidin                                                                                                               | C19H31N           | 9.21  | 273.24565 | 22      | 2     | 100                                     | 0                    | 0                   |              | C11H15                                             | 147.1168   |              |            |            |            |
| Fenpropimorph                                                                                                             | C20H33NO          | 13.78 | 303.25622 | 23      | 3     | 100                                     | 0                    | 0                   | 19           | C11H15                                             | 147.1168   |              |            |            |            |
| Fenpyroximate                                                                                                             | C24H27N3O4        | 13.67 | 421.20016 | 28      | 4     | 100                                     | 0                    | 10                  |              | C20H20N3O4                                         | 366.1448   |              |            |            |            |
| Fenson                                                                                                                    | C12H9ClO3S        | 6.01  | 267.99609 | 14      | 38    | 100                                     |                      |                     |              |                                                    |            |              |            |            |            |
| Fensulfothion                                                                                                             | C11H17O4PS2       | 9.52  | 308.03059 | 14      | 11    | 100                                     | 0                    | 1                   |              |                                                    |            |              |            |            |            |
| Fensulfothion-sulfone                                                                                                     | C11H17O5PS2       | 9.62  | 324.02550 | 14      | 11    | 100                                     | 30                   | 15                  |              |                                                    |            |              |            |            |            |
| Fenthion                                                                                                                  | C10H15O3PS2       | 10.35 | 278.02003 | 13      | 10    | 100                                     | 1                    | 1                   |              | C9H13OS                                            | 169.0682   | C9H12O2PS2   | 247.0011   |            |            |
| Fenthion oxon                                                                                                             | C10H15O4PS        | 10.03 | 262.04287 | 12      | 6     | 100                                     | 80                   | 1                   |              |                                                    |            |              |            |            |            |
| Fenthion oxonsulfone                                                                                                      | C10H15O6PS        | 7.25  | 294.03270 | 12      | 6     | 10                                      | 100                  | 5                   |              |                                                    |            |              |            |            |            |
| Fenthion oxonsulfoxide                                                                                                    | C10H15O5PS        | 7.07  | 278.03778 | 12      | 6     | 100                                     | 60                   | 10                  |              |                                                    |            |              |            |            |            |
| Fenthion sulfone                                                                                                          | C10H15O5PS2       | 8.96  | 310.00985 | 13      | 11    | 100                                     | 70                   | 15                  |              |                                                    |            |              |            |            |            |
| Fenthion sulfoxide                                                                                                        | C10H15O4PS2       | 8.78  | 294.01494 | 13      | 10    | 100                                     | 1                    | 5                   |              | x                                                  |            |              |            |            |            |
| Fenuron                                                                                                                   | C9H12N2O          | 7.24  | 164.09496 | 11      | 1     | 100                                     | 0                    | 1                   | 0            | C7H6NO                                             | 120.0444   |              |            |            |            |
| Fenvalerate                                                                                                               | C25H22ClNO3       | 14.02 | 419.12882 | 28      | 36    | 1                                       | 100                  | 20                  |              | C10H12Cl                                           | 167.0622   | C13H9O       | 181.0648   | C7H6Cl     | 125.0152   |

| Exactive pesticide screening database (Supplemental Information Mol et al, Analytical and Bioanalytical Chemistry (2012)) |                   |           |           |         |       |                                         |                      |                     |                          |                                                    |            |              |            |            |            |
|---------------------------------------------------------------------------------------------------------------------------|-------------------|-----------|-----------|---------|-------|-----------------------------------------|----------------------|---------------------|--------------------------|----------------------------------------------------|------------|--------------|------------|------------|------------|
| Analyte                                                                                                                   | Molecular formula | RT<br>min | [M] (a)   | RIA (b) |       | Rel. abundance ESI <sup>+</sup> adducts |                      |                     | Fragment<br>Rel. Int (c) | Fragments (Exactive Orbitrap using HCD cell 30 eV) |            |              |            |            |            |
|                                                                                                                           |                   |           |           | [M+1]   | [M+2] | [M+H] <sup>+</sup>                      | [M+NH4] <sup>+</sup> | [M+Na] <sup>+</sup> |                          | Fragment 1                                         | Fragment 1 | Fragment 2   | Fragment 2 | Fragment 3 | Fragment 3 |
| Fipronil                                                                                                                  | C12H4Cl2F6N4OS    | 11.07     | 435.93871 | 16      | 70    | 0                                       | 100                  | 60                  |                          |                                                    |            |              |            |            |            |
| Fipronil-sulfone                                                                                                          | C12H4Cl2F6N4O2S   | 11.34     | 451.93362 | 16      | 70    | 1                                       | 100                  | 15                  |                          |                                                    |            |              |            |            |            |
| Flamprop-isopropyl                                                                                                        | C19H19ClFNO3      | 10.60     | 363.10375 | 22      | 35    | 100                                     | 0                    | 5                   |                          | C7H5O                                              | 105.0335   |              |            |            |            |
| Flamprop-methyl                                                                                                           | C17H15ClFNO3      | 10.50     | 335.07245 | 19      | 34    | 100                                     | 0                    | 6                   |                          | C7H5O                                              | 105.0335   |              |            |            |            |
| Flonicamid                                                                                                                | C9H6F3N3O         | 4.80      | 229.04630 | 11      | 1     | 0                                       | 100                  | 0                   | 62                       | C7H3ONF3                                           | 174.0161   |              |            |            |            |
| Fluazifop                                                                                                                 | C15H12F3NO4       | 9.29      | 327.07184 | 17      | 2     | 100                                     | 0                    | 1                   |                          | C14H11F3NO2                                        | 282.0736   |              |            |            |            |
| Fluazifop-butyl                                                                                                           | C19H20F3NO4       | 12.31     | 383.13444 | 22      | 3     | 100                                     | 1                    | 5                   |                          | C14H11O2NF3                                        | 282.0736   | C15H13O4NF3  | 328.0791   | C15H12O3N  | 254.0812   |
| Flubenzimine                                                                                                              | C17H10F6N4S       | 11.38     | 416.05304 | 21      | 6     | 100                                     |                      |                     |                          |                                                    |            |              |            |            |            |
| Fluchloralin                                                                                                              | C12H13ClF3N3O4    | 10.72     | 355.05467 | 15      | 34    | 0                                       | 100                  | 0                   |                          |                                                    |            |              |            |            |            |
| Flucycloxuron                                                                                                             | C25H20ClF2N3O3    | 12.97     | 483.11613 | 29      | 36    | 100                                     | 0                    | 50                  | 191                      | C8H6ON                                             | 132.0444   |              |            |            |            |
| Flucythrinate                                                                                                             | C26H23F2NO4       | 12.75     | 451.15952 | 29      | 5     | 0                                       | 100                  | 1                   |                          | C11H13OF2                                          | 199.0929   | C10H10O2F    | 181.0659   | C8H7OF2    | 157.0459   |
| Fludioxonil                                                                                                               | C12H6F2N2O2       | 10.34     | 248.03973 | 14      | 1     | 0                                       | 100                  | 40                  |                          |                                                    |            |              |            |            |            |
| Flufenacet                                                                                                                | C14H13F4N3O2S     | 10.88     | 363.06646 | 18      | 6     | 100                                     | 0                    | 10                  | 66                       | C8H7FNO                                            | 152.0506   | C11H13FNO    | 194.0976   | C9H11FN    | 152.0870   |
| Flufenoxuron                                                                                                              | C21H11ClF6N2O3    | 13.12     | 488.03624 | 24      | 35    | 70                                      | 15                   | 100                 |                          | C7H6F2NO                                           | 158.0412   | C7H3OF2      | 141.0146   |            |            |
| Flumethrin                                                                                                                | C28H22Cl2FNO3     | 15.13     | 509.09608 | 32      | 69    | 5                                       | 100                  | 25                  |                          |                                                    |            |              |            |            |            |
| Flumioxazin                                                                                                               | C19H15FN2O4       | 9.87      | 354.10159 | 22      | 3     | 100                                     | 40                   | 50                  |                          | C18H16FN2O3                                        | 327.1139   |              |            |            |            |
| Fluometuron                                                                                                               | C10H11F3N2O       | 9.45      | 232.08235 | 12      | 1     | 100                                     | 1                    | 1                   | 92                       | C3H6NO                                             | 72.0444    |              |            |            |            |
| Fluopicolide                                                                                                              | C14H8Cl3F3N2O     | 10.46     | 381.96543 | 16      | 97    | 100                                     | 0                    | 1                   |                          |                                                    |            |              |            |            |            |
| Fluoroglycofen-ethyl                                                                                                      | C18H13ClF3NO7     | 11.82     | 447.03326 | 21      | 35    | 1                                       | 100                  | 10                  |                          | C14H6ClF3NO4                                       | 343.9932   |              |            |            |            |
| Fluotrimazole                                                                                                             | C22H16F3N3        | 11.82     | 379.12963 | 26      | 3     | 0                                       | 100                  | 0                   |                          |                                                    |            |              |            |            |            |
| Fluoxastrobin                                                                                                             | C21H16ClF4NO5     | 10.71     | 458.07933 | 25      | 36    | 100                                     | 1                    | 8                   |                          |                                                    |            |              |            |            |            |
| Fluquinconazole                                                                                                           | C16H8Cl2FN5O      | 10.83     | 375.00899 | 20      | 66    | 100                                     | 0                    | 0                   |                          | C15H8Cl2FN4O                                       | 349.0054   |              |            |            |            |
| Flurochloridone                                                                                                           | C12H10Cl2F3NO     | 10.66     | 311.00915 | 14      | 65    | 100                                     | 0                    | 0                   |                          | C12H10Cl2F2NO                                      | 292.0102   |              |            |            |            |
| Fluroxypyr                                                                                                                | C7H5Cl2FN2O3      | 7.33      | 253.96613 | 9       | 65    | 100                                     | 0                    | 0                   |                          | C5H4Cl2FN2                                         | 180.9730   |              |            |            |            |
| Fluroxypyr-1-meptyl                                                                                                       | C15H21Cl2FN2O3    | 13.13     | 366.09133 | 18      | 66    | 100                                     | 0                    | 20                  |                          | C7H6Cl2FN2O                                        | 254.9734   | C6H4Cl2FN2O  | 208.9679   |            |            |
| Flurprimidol                                                                                                              | C15H15F3N2O2      | 10.43     | 312.10856 | 18      | 2     | 100                                     | 0                    | 0                   | 34                       | C12H9N2F3                                          | 270.0611   |              |            |            |            |
| Flurtamone                                                                                                                | C18H14F3NO2       | 10.11     | 333.09766 | 20      | 2     | 100                                     | 0                    | 1                   |                          | C15H10F3                                           | 247.0729   | C14H10       | 178.0777   |            |            |
| Flusilazole                                                                                                               | C16H15F2N3Si      | 11.06     | 315.10033 | 24      | 5     | 100                                     | 0                    | 1                   |                          | C8H8N3F                                            | 165.0697   | C14H13F2Si   | 247.0749   |            |            |
| Flusulfamide                                                                                                              | C13H7Cl2F3N2O4S   | 11.00     | 413.94557 | 16      | 70    | 100                                     | 0                    | 0                   |                          |                                                    |            |              |            |            |            |
| Flutolanil                                                                                                                | C17H16F3NO2       | 10.41     | 323.11331 | 19      | 2     | 100                                     | 0                    | 3                   |                          | C14H10F2NO2                                        | 262.0674   | C14H9FNO2    | 242.0612   |            |            |
| Flutriafol                                                                                                                | C16H13F2N3O       | 9.44      | 301.10267 | 19      | 2     | 100                                     | 0                    | 1                   |                          | C7H4FO                                             | 123.0241   |              |            |            |            |
| Fluvalinate tau-                                                                                                          | C26H22ClF3N2O3    | 14.38     | 502.12711 | 30      | 37    | 100                                     | 0                    | 0                   |                          | ?                                                  | 181.0648   | C14H10ON     | 208.0757   | C13H9O     | 181.0648   |
| Fomesafen                                                                                                                 | C15H10ClF3N2O6S   | 10.68     | 437.99002 | 18      | 39    | 0                                       | 100                  | 10                  |                          | C14H6ClF3NO4                                       | 343.9932   |              |            |            |            |
| Fonofos                                                                                                                   | C10H15OPS2        | 11.57     | 246.03020 | 13      | 10    | 100                                     | 0                    | 0                   |                          | C2H6OPS                                            | 108.9872   | C4H10OPS     | 137.0185   |            |            |
| Foramsulfuron                                                                                                             | C17H20N6O7S       | 9.04      | 452.11142 | 22      | 8     | 100                                     | 1                    | 20                  |                          |                                                    |            |              |            |            |            |
| Forchlorfenuron                                                                                                           | C12H10ClN3O       | 9.91      | 247.05124 | 15      | 33    | 100                                     |                      | 3                   |                          |                                                    |            |              |            |            |            |
| Formetanate                                                                                                               | C11H15N3O2        | 4.98      | 221.11643 | 13      | 1     | 0                                       | 100                  | 0                   |                          |                                                    |            |              |            |            |            |
| Formothion                                                                                                                | C6H12NO4PS2       | 8.31      | 256.99454 | 9       | 10    | 100                                     | 10                   | 30                  |                          |                                                    |            |              |            |            |            |
| Fosthiazate                                                                                                               | C9H18NO3PS2       | 9.29      | 283.04657 | 12      | 10    | 100                                     | 1                    | 5                   |                          | C3H6NOS                                            | 104.0165   | C5H11NO3PS2  | 227.9912   |            |            |
| Fuberidazole                                                                                                              | C11H8N2O          | 8.59      | 184.06366 | 13      | 1     | 100                                     |                      | 1                   |                          | C10H9N2                                            | 157.0760   |              |            |            |            |
| Furalaxyl                                                                                                                 | C17H19NO4         | 10.07     | 301.13141 | 19      | 3     | 100                                     | 0                    | 60                  |                          |                                                    |            |              |            |            |            |
| Furathiocarb                                                                                                              | C18H26N2O5S       | 12.55     | 382.15624 | 22      | 7     | 100                                     | 0                    | 25                  | 38                       | C10H11O2S                                          | 195.0474   |              |            |            |            |
| Halfenprox                                                                                                                | C24H23BrF2O3      | 17.50     | 476.07986 | 27      | 101   | 0                                       | 100                  | 0                   |                          |                                                    |            |              |            |            |            |
| Haloxyfop                                                                                                                 | C15H11ClF3NO4     | 10.66     | 361.03287 | 17      | 34    | 100                                     | 0                    | 0                   | 23                       | C14H10ClF3NO2                                      | 316.0347   | C12H6ClF3NO2 | 288.0034   |            |            |
| Haloxyfop-2-ethoxyethyl                                                                                                   | C19H19ClF3NO5     | 12.27     | 433.09039 | 22      | 35    | 100                                     | 5                    | 10                  |                          |                                                    |            |              |            |            |            |
| Haloxyfop-methyl                                                                                                          | C16H13ClF3NO4     | 11.85     | 375.04852 | 18      | 34    | 100                                     | 2                    | 5                   |                          |                                                    |            |              |            |            |            |
| Heptenophos                                                                                                               | C9H12ClO4P        | 9.73      | 250.01617 | 10      | 33    | 100                                     | 15                   | 2                   |                          | C7H6Cl                                             | 125.0153   | C7H6[37]Cl   | 127.0123   |            |            |
| Hexaconazole                                                                                                              | C14H17Cl2N3O      | 11.66     | 313.07487 | 17      | 65    | 100                                     | 0                    | 0                   | 55                       | C2H4N3                                             | 70.0400    | C7H5Cl2      | 158.9763   |            |            |

| Exactive pesticide screening database (Supplemental Information Mol et al, Analytical and Bioanalytical Chemistry (2012)) |                   |       |           |         |       |                                         |                      |                     |              |                                                    |            |                 |            |                    |            |
|---------------------------------------------------------------------------------------------------------------------------|-------------------|-------|-----------|---------|-------|-----------------------------------------|----------------------|---------------------|--------------|----------------------------------------------------|------------|-----------------|------------|--------------------|------------|
| Analyte                                                                                                                   | Molecular formula | RT    | [M] (a)   | RIA (b) |       | Rel. abundance ESI <sup>+</sup> adducts |                      |                     | Fragment     | Fragments (Exactive Orbitrap using HCD cell 30 eV) |            |                 |            |                    |            |
|                                                                                                                           |                   | min   |           | [M+1]   | [M+2] | [M+H] <sup>+</sup>                      | [M+NH4] <sup>+</sup> | [M+Na] <sup>+</sup> | Rel. Int (c) | Fragment 1                                         | Fragment 1 | Fragment 2      | Fragment 2 | Fragment 3         | Fragment 3 |
| Hexaflumuron                                                                                                              | C16H8Cl2F6N2O3    | 11.85 | 459.98162 | 19      | 66    | 15                                      | 8                    | 100                 |              | C7H6F2NO                                           | 158.0412   |                 |            |                    |            |
| Hexazinone                                                                                                                | C12H20N4O2        | 8.86  | 252.15863 | 15      | 1     | 100                                     | 0                    | 5                   |              | C6H11N4O2                                          | 171.0877   | C4H9N2          | 85.0760    |                    |            |
| Hexythiazox                                                                                                               | C17H21ClN2O2S     | 13.12 | 352.10123 | 21      | 39    | 100                                     | 0                    | 60                  | 56           | C9H11NCl                                           | 168.0575   |                 |            |                    |            |
| Hymexazol                                                                                                                 | C4H5NO2           | 5.72  | 99.03203  | 5       | 1     | 100                                     | 0                    | 0                   |              |                                                    |            |                 |            |                    |            |
| Imazalil                                                                                                                  | C14H14Cl2N2O      | 10.75 | 296.04832 | 16      | 65    | 100                                     | 0                    | 0                   | 10           | C7H5Cl2                                            | 158.9763   | C7H5[37]ClCl    | 160.9733   | C11H9ON2Cl2        | 255.0086   |
| Imazamethabenz-methyl                                                                                                     | C16H20N2O3        | 8.92  | 288.14739 | 19      | 2     | 100                                     | 0                    | 1                   | 8            | C14H17ON2                                          | 229.1335   |                 |            |                    |            |
| Imazamox                                                                                                                  | C15H19N3O4        | 7.01  | 305.13756 | 18      | 2     | 100                                     | 0                    | 4                   | 10           | C9H9O3N2                                           | 193.0608   | C14H17O3N2      | 261.1234   | C12H12O3N3         | 246.0873   |
| Imazaquin                                                                                                                 | C17H17N3O3        | 8.36  | 311.12699 | 20      | 2     | 100                                     |                      | 5                   |              |                                                    |            |                 |            |                    |            |
| Imazethapyr                                                                                                               | C15H19N3O3        | 6.99  | 289.14264 | 18      | 2     | 100                                     | 0                    | 1                   |              | C9H9N2O2                                           | 177.0659   |                 |            |                    |            |
| Imidacloprid                                                                                                              | C9H10ClN5O2       | 6.72  | 255.05230 | 12      | 33    | 100                                     | 0                    | 20                  | 31           | C9H11N4                                            | 175.0978   | C9H10ClN4       | 209.0589   | C9H10[37]ClN4      | 211.0559   |
| Indoxacarb                                                                                                                | C22H17ClF3N3O7    | 11.73 | 527.07071 | 26      | 36    | 100                                     | 8                    | 65                  |              | C10H4ClN2O                                         | 203.0007   |                 |            |                    |            |
| Iodosulfuron-methyl                                                                                                       | C14H14IN5O6S      | 9.95  | 506.97095 | 18      | 7     | 100                                     | 0                    | 25                  |              | C6H7N4O2                                           | 167.0574   |                 |            |                    |            |
| Iprobenfos                                                                                                                | C13H21O3PS        | 11.27 | 288.09490 | 15      | 6     | 100                                     | 1                    | 8                   |              | C7H7                                               | 91.0542    | C7H10O3PS       | 205.0083   |                    |            |
| Iprovalicarb                                                                                                              | C18H28N2O3        | 10.87 | 320.20999 | 21      | 3     | 100                                     | 0                    | 5                   | 86           | C9H11                                              | 119.0855   | C5H10NO2        | 116.0706   |                    |            |
| Isazofos                                                                                                                  | C9H17ClN3O3PS     | 10.72 | 313.04168 | 12      | 38    | 100                                     | 0                    | 50                  |              | C5H9ClN3O                                          | 162.0429   | C2H3ClN3O       | 119.9959   |                    |            |
| Isocarbofos                                                                                                               | C11H16NO4PS       | 9.75  | 289.05377 | 14      | 6     | 0                                       | 0                    | 100                 |              |                                                    |            |                 |            |                    |            |
| Isofenphos                                                                                                                | C15H24NO4PS       | 11.72 | 345.11637 | 18      | 7     | 5                                       | 0                    | 100                 |              | C7H6O4PS                                           | 216.9719   | C9H10O4PS       | 245.0032   | C7H5O2             | 121.0284   |
| Isofenphos-methyl                                                                                                         | C14H22NO4PS       | 11.32 | 331.10072 | 17      | 7     | 50                                      | 50                   | 100                 |              | C8H8O4PS                                           | 230.9875   |                 |            |                    |            |
| Isofenphos-oxon                                                                                                           | C15H24NO5P        | 10.70 | 329.13921 | 17      | 2     | 100                                     | 0                    | 10                  |              | C9H10O5P                                           | 229.0260   | C7H6O5P         | 200.9947   |                    |            |
| Isoprocarb                                                                                                                | C11H15NO2         | 9.82  | 193.11028 | 13      | 1     | 100                                     | 10                   | 0                   |              |                                                    |            |                 |            |                    |            |
| Isoprothiolane                                                                                                            | C12H18O4S2        | 10.64 | 290.06465 | 15      | 11    | 100                                     | 0                    | 15                  |              | C9H11O3S2                                          | 231.0144   | C6H5O3S2        | 188.9675   |                    |            |
| Isoproturon                                                                                                               | C12H18N2O         | 9.74  | 206.14191 | 14      | 1     | 100                                     | 0                    | 1                   | 3            | C9H13N2O                                           | 165.1022   | C3H6NO          | 72.0444    |                    |            |
| Isoxaben                                                                                                                  | C18H24N2O4        | 10.36 | 332.17361 | 21      | 3     | 100                                     | 0                    | 10                  | 126          | C9H9O3                                             | 165.0546   |                 |            |                    |            |
| Isoxaflutole                                                                                                              | C15H12F3NO4S      | 9.58  | 359.04392 | 18      | 7     | 10                                      | 100                  | 10                  |              |                                                    |            |                 |            |                    |            |
| Isoxathion                                                                                                                | C13H16NO4PS       | 10.57 | 313.05377 | 16      | 6     | 100                                     | 0                    | 1                   |              |                                                    |            |                 |            |                    |            |
| Jasmolin I                                                                                                                | C21H30O3          | 14.25 | 330.21950 | 24      | 3     | 100                                     | 20                   | 20                  |              |                                                    |            |                 |            |                    |            |
| Jasmolin II                                                                                                               | C22H30O5          | 12.48 | 374.20932 | 25      | 4     | 100                                     | 50                   | 20                  |              |                                                    |            |                 |            |                    |            |
| Kresoxim-methyl                                                                                                           | C18H19NO4         | 11.29 | 313.13141 | 21      | 3     | 100                                     | 1                    | 20                  |              | C15H12NO4                                          | 222.0913   | C9H9N           | 137.0730   |                    |            |
| Lactofen                                                                                                                  | C19H15ClF3NO7     | 11.25 | 461.04891 | 22      | 36    | 1                                       | 100                  | 30                  |              |                                                    |            |                 |            |                    |            |
| Lenacil                                                                                                                   | C13H18N2O2        | 9.79  | 234.13683 | 15      | 1     | 100                                     | 0                    | 10                  |              | C7H9N2O2                                           | 153.0659   | C11H11ON        | 173.0835   | C13H15O2N          | 217.1097   |
| Linuron                                                                                                                   | C9H10Cl2N2O2      | 10.39 | 248.01193 | 11      | 65    | 100                                     | 1                    | 1                   | 16           | C6H4Cl2N                                           | 159.9715   | C8H7ClN2O       | 182.0241   | C6H4[37]ClClN      | 161.9685   |
| Lufenuron                                                                                                                 | C17H8Cl2F8N2O3    | 12.57 | 509.97842 | 20      | 66    | 0                                       | 0                    | 100                 |              | C7H6F2NO                                           | 158.0412   | C7H3F2O         | 141.0146   |                    |            |
| Malathion                                                                                                                 | C10H19O6PS2       | 10.53 | 330.03607 | 13      | 11    | 100                                     | 25                   | 10                  |              | C4H3O3                                             | 99.0077    | C2H6O2PS        | 124.9821   | C6H7O3             | 127.0390   |
| Malathion-oxon                                                                                                            | C10H19O7PS        | 8.82  | 314.05891 | 12      | 7     | 100                                     | 1                    | 10                  |              | C2H8O3PS                                           | 142.9926   | C3H10O3PS       | 157.0083   | C6H7O3             | 127.0390   |
| Mandipropamid                                                                                                             | C23H22ClNO4       | 10.14 | 411.12374 | 26      | 36    | 100                                     | 10                   | 1                   | 16           | C19H19O2NCl                                        | 328.1099   | C19H19O2N[37]Cl | 330.1069   |                    |            |
| MCPB-methyl                                                                                                               | C12H15ClO3        | 11.10 | 242.07097 | 14      | 33    | 100                                     | 0                    | 0                   |              | x                                                  |            |                 |            |                    |            |
| Mecarbam                                                                                                                  | C10H20NO5PS2      | 10.93 | 329.05205 | 13      | 11    | 100                                     | 1                    | 1                   |              | CH4O2PS2                                           | 142.9385   | C4H6NO3         | 116.0341   | C4H8O5PS           | 198.9825   |
| Mefenacet                                                                                                                 | C16H14N2O2S       | 10.67 | 298.07760 | 19      | 6     | 100                                     | 0                    | 2                   |              |                                                    |            |                 |            |                    |            |
| Mefenpyr-diethyl                                                                                                          | C16H18Cl2N2O4     | 11.61 | 372.06436 | 19      | 66    | 100                                     | 10                   | 5                   | 39           | C14H13Cl2N2O3                                      | 327.0298   | C6H4NCl2        | 159.9715   | C14H13Cl[37]ClN2O3 | 329.0268   |
| Mefluidide                                                                                                                | C11H13F3N2O3S     | 8.72  | 310.05990 | 14      | 6     | 100                                     | 80                   | 15                  |              | C7H5O                                              | 105.0335   |                 |            |                    |            |
| Mepanipyrim                                                                                                               | C14H13N3          | 10.93 | 223.11095 | 17      | 1     | 100                                     | 0                    | 1                   |              |                                                    |            |                 |            |                    |            |
| Mephosfolan                                                                                                               | C8H16NO3PS2       | 8.51  | 269.03092 | 11      | 10    | 100                                     | 0                    | 5                   |              |                                                    |            |                 |            |                    |            |
| Mepronil                                                                                                                  | C17H19NO2         | 10.57 | 269.14158 | 19      | 2     | 100                                     | 0                    | 1                   |              | C8H7O                                              | 119.0491   | ??              | 228.1008   | ??                 | 136.0388   |
| Mesosulfuron-methyl                                                                                                       | C17H21N5O9S2      | 9.22  | 503.07807 | 23      | 13    | 100                                     | 0                    | 5                   | 141          | C7H8O3N3                                           | 182.0560   |                 |            |                    |            |
| Mesotrione                                                                                                                | C14H13NO7S        | 5.58  | 339.04127 | 17      | 7     | 30                                      | 100                  | 0                   |              | C8H6NO5S                                           | 227.9961   |                 |            |                    |            |
| Metaflumizone I                                                                                                           | C24H16F6N4O2      | 11.64 | 506.11775 | 28      | 4     | 100                                     | 0                    | 1                   |              |                                                    |            |                 |            |                    |            |
| Metaflumizone II                                                                                                          | C24H16F6N4O2      | 12.13 | 506.11775 | 28      | 4     | 100                                     | 0                    | 1                   |              |                                                    |            |                 |            |                    |            |
| Metalaxyl                                                                                                                 | C15H21NO4         | 9.71  | 279.14706 | 17      | 2     | 100                                     | 1                    | 100                 | 23           | C11H14N                                            | 160.1121   | C12H18NO        | 192.1383   | C13H18NO2          | 220.1332   |



| Exactive pesticide screening database (Supplemental Information Mol et al, Analytical and Bioanalytical Chemistry (2012)) |                   |       |           |         |       |                                         |                      |                     |              |                                                    |            |                |            |             |            |
|---------------------------------------------------------------------------------------------------------------------------|-------------------|-------|-----------|---------|-------|-----------------------------------------|----------------------|---------------------|--------------|----------------------------------------------------|------------|----------------|------------|-------------|------------|
| Analyte                                                                                                                   | Molecular formula | RT    | [M] (a)   | RIA (b) |       | Rel. abundance ESI <sup>+</sup> adducts |                      |                     | Fragment     | Fragments (Exactive Orbitrap using HCD cell 30 eV) |            |                |            |             |            |
|                                                                                                                           |                   | min   |           | [M+1]   | [M+2] | [M+H] <sup>+</sup>                      | [M+NH4] <sup>+</sup> | [M+Na] <sup>+</sup> | Rel. Int (c) | Fragment 1                                         | Fragment 1 | Fragment 2     | Fragment 2 | Fragment 3  | Fragment 3 |
| Metamitron                                                                                                                | C10H10N4O         | 7.34  | 202.08546 | 13      | 1     | 100                                     | 0                    | 1                   | 1            | C9H11N4                                            | 175.0978   | C3H10N3O       | 104.0818   |             |            |
| Metazachlor                                                                                                               | C14H16ClN3O       | 9.61  | 277.09819 | 17      | 33    | 100                                     | 0                    | 5                   |              |                                                    |            |                |            |             |            |
| Metconazole                                                                                                               | C17H22ClN3O       | 11.69 | 319.14514 | 20      | 34    | 100                                     | 0                    | 0                   |              | C2H4N3                                             | 70.0400    | C7H6Cl         | 125.0153   |             |            |
| Methabenzthiazuron                                                                                                        | C10H11N3OS        | 9.67  | 221.06228 | 13      | 5     | 100                                     | 0                    | 20                  | 48           | C8H9N2S                                            | 165.0481   | C6H6SN         | 124.0215   |             |            |
| Methacrifos                                                                                                               | C7H13O5PS         | 9.98  | 240.02213 | 9       | 6     | 40                                      | 100                  | 1                   |              | C6H10O4PS                                          | 209.0032   |                |            |             |            |
| Methamidophos                                                                                                             | C2H8NO2PS         | 4.97  | 141.00134 | 4       | 5     | 100                                     | 3                    | 3                   |              |                                                    |            |                |            |             |            |
| Methidathion                                                                                                              | C6H11N2O4PS3      | 9.95  | 301.96186 | 10      | 15    | 100                                     | 30                   | 10                  |              | C3H5N2O                                            | 85.0396    | C4H5N2O2S      | 145.0066   |             |            |
| Methiocarb                                                                                                                | C11H15NO2S        | 10.37 | 225.08235 | 14      | 6     | 100                                     | 15                   | 1                   | 49           | C8H9O                                              | 121.0648   | C9H13OS        | 169.0682   | C8H10O      | 122.0726   |
| Methiocarb-sulfone                                                                                                        | C11H15NO4S        | 7.30  | 257.07218 | 14      | 6     | 30                                      | 100                  | 5                   |              | C9H13O3S                                           | 201.0580   | C8H10O         | 122.0726   |             |            |
| Methiocarb-sulfoxide                                                                                                      | C11H15NO3S        | 6.69  | 241.07727 | 14      | 6     | 100                                     | 0                    | 1                   |              | C9H13O2S                                           | 185.0631   | C8H10O2S       | 170.0396   | C8H10O      | 122.0726   |
| Methomyl                                                                                                                  | C5H10N2O2S        | 6.14  | 162.04630 | 7       | 5     | 100                                     | 1                    | 1                   | 4            | C3H6NS                                             | 88.0215    | C3H8NOS        | 106.0321   |             |            |
| Methoprene                                                                                                                | C19H34O3          | 15.60 | 310.25080 | 21      | 3     | 0                                       | 0                    | 100                 |              |                                                    |            |                |            |             |            |
| Methoprotryne                                                                                                             | C11H21N5OS        | 10.33 | 271.14668 | 15      | 5     | 100                                     | 1                    | 1                   |              |                                                    |            |                |            |             |            |
| Methoxyfenozide                                                                                                           | C22H28N2O3        | 10.52 | 368.20999 | 25      | 3     | 100                                     | 2                    | 10                  | 265          | C9H9O2                                             | 149.0597   | C9H9O          | 133.0648   |             |            |
| Metobromuron                                                                                                              | C9H11BrN2O2       | 9.57  | 258.00039 | 11      | 98    | 100                                     |                      | 1                   |              | C6H5NBr                                            | 169.9600   | C6H5N[81]Br    | 171.9579   |             |            |
| Metolachlor                                                                                                               | C15H22ClNO2       | 11.26 | 283.13391 | 17      | 34    | 100                                     | 0                    | 1                   |              | C14H19ClNO                                         | 252.1150   | C14H19[37]ClNO | 254.1120   | C12H18N     | 176.1434   |
| Metolcarb                                                                                                                 | C9H11NO2          | 8.53  | 165.07898 | 11      | 1     | 100                                     | 10                   | 1                   |              | C7H9O                                              | 109.0648   | C6H6O          | 94.0413    |             |            |
| Metosulam                                                                                                                 | C14H13Cl2N5O4S    | 8.57  | 417.00653 | 18      | 70    | 100                                     | 0                    | 5                   | 84           | C7H7Cl2N                                           | 174.9950   |                |            |             |            |
| Metoxuron                                                                                                                 | C10H13ClN2O2      | 8.12  | 228.06656 | 12      | 33    | 100                                     | 0                    | 1                   | 34           | C3H6NO                                             | 72.0444    | C7H7ClNO       | 156.0211   |             |            |
| Metrafenone                                                                                                               | C19H21BrO5        | 11.83 | 408.05724 | 21      | 100   | 100                                     | 0                    | 2                   |              | C11H13O4                                           | 209.0808   |                |            |             |            |
| Metribuzin                                                                                                                | C8H14N4OS         | 8.99  | 214.08883 | 11      | 5     | 100                                     | 0                    | 0                   | 3            | C7H15N4S                                           | 187.1012   | C4H5ON3        | 111.0427   |             |            |
| Metsulfuron-methyl                                                                                                        | C14H15N5O6S       | 8.69  | 381.07431 | 18      | 7     | 100                                     |                      | 15                  |              | C6H7N4O2                                           | 167.0564   | C8H7O4S        | 199.0060   |             |            |
| Mevinphos                                                                                                                 | C7H13O6P          | 7.61  | 224.04498 | 8       | 2     | 92                                      | 100                  | 7                   |              |                                                    |            |                |            |             |            |
| Milbemectin A3                                                                                                            | C31H44O7          | 14.79 | 528.30870 | 35      | 7     | 3                                       | 100                  | 40                  |              |                                                    |            |                |            |             |            |
| Milbemectin A4                                                                                                            | C32H46O7          | 15.78 | 542.32435 | 36      | 8     | 3                                       | 100                  | 50                  |              |                                                    |            |                |            |             |            |
| Monalide                                                                                                                  | C13H18ClNO        | 11.13 | 239.10769 | 15      | 33    | 100                                     | 1                    | 0                   |              |                                                    |            |                |            |             |            |
| Monocrotophos                                                                                                             | C7H14NO5P         | 6.28  | 223.06096 | 8       | 1     | 100                                     | 20                   | 10                  |              | C5H8NO                                             | 98.0600    | C2H8PO4        | 127.0155   | C6H10O5P    | 193.0260   |
| Monolinuron                                                                                                               | C9H11ClN2O2       | 9.31  | 214.05091 | 11      | 33    | 100                                     | 1                    | 1                   |              | C6H5ClN                                            | 126.0105   | C8H8N2O        | 148.0631   | C6H5[37]ClN | 128.0076   |
| Monuron                                                                                                                   | C9H11ClN2O        | 8.85  | 198.05599 | 11      | 33    | 100                                     | 0                    | 1                   | 2            | C7H5ClNO                                           | 154.0054   | C6H5ClN        | 126.0105   |             |            |
| Myclobutanil                                                                                                              | C15H17ClN4        | 10.58 | 288.11417 | 18      | 33    | 100                                     | 0                    | 0                   |              |                                                    |            |                |            |             |            |
| Naphthoxyacetic acid                                                                                                      | C12H10O3          | 9.02  | 202.06299 | 13      | 1     | 30                                      | 100                  | 30                  |              |                                                    |            |                |            |             |            |
| Naphthylacetic acid 1-                                                                                                    | C12H10O2          | 9.45  | 186.06808 | 13      | 1     | 0                                       | 100                  | 10                  |              |                                                    |            |                |            |             |            |
| Napropamide                                                                                                               | C17H21NO2         | 11.05 | 271.15723 | 19      | 2     | 100                                     | 0                    | 1                   |              | C10H9                                              | 129.0699   | C12H11O        | 171.0804   |             |            |
| Neburon                                                                                                                   | C12H16Cl2N2O      | 11.38 | 274.06397 | 14      | 65    | 100                                     | 0                    | 10                  | 1            | C6H12NO                                            | 114.0913   |                |            |             |            |
| Nicosulfuron                                                                                                              | C15H18N6O6S       | 8.63  | 410.10085 | 20      | 7     | 100                                     |                      | 30                  |              |                                                    |            |                |            |             |            |
| Nicotine                                                                                                                  | C10H14N2          | 2.58  | 162.11570 | 12      | 1     | 100                                     | 0                    | 0                   |              | C9H10N                                             | 132.0808   | C9H8N          | 130.0651   | C7H8N       | 106.0651   |
| Nitenpyram                                                                                                                | C11H15ClN4O2      | 5.98  | 270.08835 | 14      | 33    | 100                                     | 0                    | 5                   | 6            | C6H5NCl                                            | 126.0105   | C11H14ClN4     | 237.0902   |             |            |
| Norflurazon                                                                                                               | C12H9ClF3N3O      | 9.86  | 303.03862 | 14      | 33    | 100                                     | 0                    | 1                   |              |                                                    |            |                |            |             |            |
| Novaluron                                                                                                                 | C17H9ClF8N2O4     | 11.89 | 492.01231 | 20      | 35    | 35                                      | 25                   | 100                 |              |                                                    |            |                |            |             |            |
| Nuarimol                                                                                                                  | C17H12ClFN2O      | 10.20 | 314.06222 | 20      | 34    | 100                                     | 0                    | 0                   |              | C16H11FNO                                          | 252.0819   | C15H9ClF       | 243.0371   | C4H5N2      | 81.0447    |
| Ofurace                                                                                                                   | C14H16ClNO3       | 8.74  | 281.08187 | 16      | 34    | 100                                     | 25                   | 2                   |              |                                                    |            |                |            |             |            |
| Omethoate                                                                                                                 | C5H12NO4PS        | 5.43  | 213.02247 | 7       | 5     | 100                                     | 0                    | 1                   | 11           | C2H6O2PS                                           | 124.9821   | C3H8O3PS       | 154.9926   | C3H8O4PS    | 182.9881   |
| Orbencarb                                                                                                                 | C12H16ClNOS       | 11.76 | 257.06411 | 15      | 38    | 100                                     | 0                    | 1                   |              |                                                    |            |                |            |             |            |
| Oxadiargyl                                                                                                                | C15H14Cl2N2O3     | 11.51 | 340.03815 | 18      | 66    | 90                                      | 50                   | 100                 |              |                                                    |            |                |            |             |            |
| Oxadiazon                                                                                                                 | C15H18Cl2N2O3     | 12.76 | 344.06945 | 18      | 66    | 10                                      | 100                  | 15                  |              |                                                    |            |                |            |             |            |
| Oxadixyl                                                                                                                  | C14H18N2O4        | 8.12  | 278.12666 | 17      | 2     | 100                                     | 35                   | 10                  |              | C12H15N2O2                                         | 219.1128   | C9H11N         | 133.0886   | C4H8NO2     | 102.0550   |
| Oxamyl                                                                                                                    | C7H13N3O3S        | 5.76  | 219.06776 | 10      | 5     | 1                                       | 100                  | 5                   | 36           | C3H6NO                                             | 72.0444    |                |            |             |            |
| Oxycarboxin                                                                                                               | C12H13NO4S        | 7.54  | 267.05653 | 15      | 6     | 100                                     | 1                    | 25                  |              | C6H7O4S                                            | 175.0060   |                |            |             |            |

| Exactive pesticide screening database (Supplemental Information Mol et al, Analytical and Bioanalytical Chemistry (2012)) |                   |       |           |         |       |                                         |                      |                     |                       |                                                    |            |              |            |                    |            |
|---------------------------------------------------------------------------------------------------------------------------|-------------------|-------|-----------|---------|-------|-----------------------------------------|----------------------|---------------------|-----------------------|----------------------------------------------------|------------|--------------|------------|--------------------|------------|
| Analyte                                                                                                                   | Molecular formula | RT    |           | RIA (b) |       | Rel. abundance ESI <sup>+</sup> adducts |                      |                     | Fragment Rel. Int (c) | Fragments (Exactive Orbitrap using HCD cell 30 eV) |            |              |            |                    |            |
|                                                                                                                           |                   | min   | [M] (a)   | [M+1]   | [M+2] | [M+H] <sup>+</sup>                      | [M+NH4] <sup>+</sup> | [M+Na] <sup>+</sup> |                       | Fragment 1                                         | Fragment 1 | Fragment 2   | Fragment 2 | Fragment 3         | Fragment 3 |
| Oxydemeton-methyl                                                                                                         | C6H15O4PS2        | 5.92  | 246.01494 | 9       | 10    | 100                                     | 0                    | 10                  | 51                    | C4H10PO3S                                          | 169.0083   | C2H8O4P      | 127.0155   |                    |            |
| Paclobutrazol                                                                                                             | C15H20ClN3O       | 10.51 | 293.12949 | 18      | 34    | 100                                     | 0                    | 0                   | 31                    | C2H4N3                                             | 70.0400    | C7H6Cl       | 125.0153   |                    |            |
| Paraoxon                                                                                                                  | C10H14NO6P        | 9.51  | 275.05587 | 12      | 2     | 100                                     | 90                   | 15                  |                       |                                                    |            |              |            |                    |            |
| Paraoxon-methyl                                                                                                           | C8H10NO6P         | 8.30  | 247.02457 | 10      | 2     | 100                                     | 10                   | 1                   |                       |                                                    |            |              |            |                    |            |
| Parathion                                                                                                                 | C10H14NO5PS       | 6.16  | 291.03303 | 13      | 6     | 100                                     | 0                    | 0                   |                       | C6H7NO5PS                                          | 235.9777   |              |            |                    |            |
| Penconazole                                                                                                               | C13H15Cl2N3       | 11.43 | 283.06430 | 16      | 65    | 100                                     | 0                    | 0                   | 58                    | C7H5Cl2                                            | 158.9763   | C2H4N3       | 70.0400    | C7H5Cl2            | 158.9763   |
| Pencycuron                                                                                                                | C19H21ClN2O       | 11.82 | 328.13424 | 22      | 34    | 100                                     | 0                    | 5                   | 86                    | C7H6Cl                                             | 125.0153   | C7H6[37]Cl   | 127.0123   |                    |            |
| Pendimethalin                                                                                                             | C13H19N3O4        | 13.25 | 281.13756 | 16      | 2     | 100                                     | 0                    | 0                   |                       | C8H8N3O3                                           | 194.0560   | C8H10N3O4    | 212.0666   |                    |            |
| Penoxsulam                                                                                                                | C16H14F5N5O5S     | 8.64  | 483.06358 | 21      | 7     | 100                                     | 0                    | 25                  | 44                    | C7H9O2N5                                           | 195.0751   |              |            |                    |            |
| Permethrin                                                                                                                | C21H20Cl2O3       | 14.77 | 390.07895 | 24      | 67    | 5                                       | 100                  | 30                  |                       | C13H11O                                            | 183.0804   |              |            |                    |            |
| Phenmedipham                                                                                                              | C16H16N2O4        | 9.87  | 300.11101 | 19      | 2     | 30                                      | 100                  | 100                 | 155                   | C7H6O2N                                            | 136.0393   | C8H10NO3     | 168.0655   |                    |            |
| Phenothrin                                                                                                                | C23H26O3          | 15.14 | 350.18820 | 26      | 4     | 100                                     | 50                   | 20                  |                       |                                                    |            |              |            |                    |            |
| Phenthoate                                                                                                                | C12H17O4PS2       | 11.22 | 320.03059 | 15      | 11    | 100                                     | 10                   | 1                   |                       | C10H11O2                                           | 163.0754   |              |            |                    |            |
| Phorate                                                                                                                   | C7H17O2PS3        | 11.79 | 260.01283 | 10      | 14    | 100                                     |                      |                     |                       |                                                    |            |              |            |                    |            |
| Phorate-oxon-sulfon                                                                                                       | C7H17O5PS2        | 7.55  | 276.02550 | 10      | 10    | 100                                     | 100                  | 15                  |                       |                                                    |            |              |            |                    |            |
| Phorate-oxon-sulfoxide                                                                                                    | C7H17O4PS2        | 7.24  | 260.03059 | 10      | 10    | 100                                     | 10                   | 10                  |                       |                                                    |            |              |            |                    |            |
| Phorate-sulfone                                                                                                           | C7H17O4PS3        | 9.48  | 292.00266 | 10      | 15    | 100                                     | 10                   | 1                   |                       | CH4O2PS2                                           | 142.9385   | H2PO2S       | 96.9508    |                    |            |
| Phorate-sulfoxide                                                                                                         | C7H17O3PS3        | 9.36  | 276.00775 | 10      | 14    | 100                                     | 3                    | 5                   |                       | CH4O2PS2                                           | 142.9385   | H2PO2S       | 96.9508    |                    |            |
| Phosalone                                                                                                                 | C12H15ClNO4PS2    | 11.69 | 366.98687 | 16      | 43    | 100                                     | 50                   | 30                  | 166                   | C8H5ClNO2                                          | 182.0003   | C7H5NCl      | 138.0105   | C6H5ONS            | 139.0086   |
| Phosfolan                                                                                                                 | C7H14NO3PS2       | 7.83  | 255.01527 | 10      | 10    | 100                                     | 0                    | 1                   |                       |                                                    |            |              |            |                    |            |
| Phosmet                                                                                                                   | C11H12NO4PS2      | 10.03 | 316.99454 | 14      | 11    | 100                                     | 25                   | 30                  |                       |                                                    | C9H6NO2    | 160          |            |                    |            |
| Phosmet-oxon                                                                                                              | C11H12NO5PS       | 8.16  | 301.01738 | 14      | 6     | 100                                     | 40                   | 30                  |                       |                                                    |            |              |            |                    |            |
| Phosphamidon I                                                                                                            | C10H19ClNO5P      | 8.12  | 299.06894 | 12      | 34    | 100                                     | 90                   | 1                   |                       | C2H8O4P                                            | 127.0155   | C8H13ONCl    | 174.0680   | C6H11NCl           | 132.0575   |
| Phosphamidon II                                                                                                           | C10H19ClNO5P      | 8.30  | 299.06894 | 12      | 34    | 100                                     |                      | 5                   |                       | C2H8O4P                                            | 127.0155   | C8H13ONCl    | 174.0680   | C6H11NCl           | 132.0575   |
| Phoxim                                                                                                                    | C12H15N2O3PS      | 11.61 | 298.05410 | 15      | 6     | 100                                     | 15                   | 0                   | 11                    | C8H5N2                                             | 129.0447   |              |            |                    |            |
| Picloram                                                                                                                  | C6H3Cl3N2O2       | 5.79  | 239.92601 | 7       | 97    | 100                                     | 0                    | 1                   |                       |                                                    |            |              |            |                    |            |
| Picolinafen                                                                                                               | C19H12F4N2O2      | 12.47 | 376.08349 | 22      | 3     | 100                                     | 50                   | 20                  |                       |                                                    |            |              |            |                    |            |
| Picoxystrobin                                                                                                             | C18H16F3NO4       | 10.97 | 367.10314 | 21      | 3     | 100                                     | 0                    | 5                   |                       | C10H9O                                             | 145.0648   | C12H13O3     | 205.0859   |                    |            |
| Piperonyl butoxide                                                                                                        | C19H30O5          | 12.94 | 338.20932 | 21      | 3     | 1                                       | 100                  | 10                  |                       | C11H13O2                                           | 177.0910   | C10H11O      | 147.0804   | C9H11              | 119.0855   |
| Pirimicarb                                                                                                                | C11H18N4O2        | 9.49  | 238.14298 | 14      | 1     | 100                                     | 0                    | 0                   | 5                     | C9H16N3O                                           | 182.1288   | C3H8N2       | 72.0682    |                    |            |
| Pirimicarb desmethyl-                                                                                                     | C10H16N4O2        | 8.14  | 224.12733 | 13      | 1     | 100                                     | 0                    | 1                   |                       |                                                    |            |              |            |                    |            |
| Pirimicarb desmethylformamido-                                                                                            | C11H16N4O3        | 8.63  | 252.12224 | 14      | 1     | 100                                     | 0                    | 10                  | 34                    | C3H6NO                                             | 72.0444    |              |            |                    |            |
| Pirimiphos-ethyl                                                                                                          | C13H24N3O3PS      | 12.81 | 333.12760 | 17      | 6     | 100                                     | 0                    | 1                   | 54                    | C9H16N3S                                           | 198.1059   | C9H16N3O     | 182.1288   | C7H12N3S           | 170.0746   |
| Pirimiphos-methyl                                                                                                         | C11H20N3O3PS      | 11.85 | 305.09630 | 14      | 6     | 100                                     | 0                    | 0                   | 21                    | C9H14N3                                            | 164.1182   | C5H6N3       | 108.0556   | C7H10N3            | 136.0869   |
| Prallethrin cis-                                                                                                          | C19H24O3          | 11.80 | 300.17255 | 21      | 3     | 100                                     | 60                   | 25                  |                       |                                                    |            |              |            |                    |            |
| Prallethrin trans-                                                                                                        | C19H24O3          | 11.94 | 300.17255 | 21      | 3     | 100                                     | 60                   | 25                  |                       |                                                    |            |              |            |                    |            |
| Primisulfuron-Methyl                                                                                                      | C15H12F4N4O7S     | 10.28 | 468.03628 | 19      | 7     | 100                                     | 8                    | 15                  |                       |                                                    |            |              |            |                    |            |
| Prochloraz                                                                                                                | C15H16Cl3N3O2     | 11.72 | 375.03081 | 18      | 98    | 100                                     | 0                    | 1                   | 2                     | C12H13NO2Cl3                                       | 308.0006   | C9H7Cl3NO2   | 265.9537   | C12H13NO2Cl2[37]Cl | 309.9977   |
| Profenofos                                                                                                                | C11H15BrClO3PS    | 12.40 | 371.93514 | 13      | 135   | 100                                     | 15                   | 5                   |                       |                                                    |            |              |            |                    |            |
| Profluralin                                                                                                               | C14H16F3N3O4      | 14.49 | 347.10929 | 17      | 2     | 0                                       | 100                  | 0                   |                       |                                                    |            |              |            |                    |            |
| Promecarb                                                                                                                 | C12H17NO2         | 10.57 | 207.12593 | 14      | 1     | 100                                     | 10                   | 1                   | 47                    | C7H9O                                              | 109.0648   |              |            |                    |            |
| Prometryn                                                                                                                 | C10H19N5S         | 10.56 | 241.13612 | 14      | 5     | 100                                     | 0                    | 0                   |                       | C7H14N5S                                           | 200.0964   | C4H8N5S      | 158.0495   |                    |            |
| Propachlor                                                                                                                | C11H14ClNO        | 9.72  | 211.07639 | 13      | 33    | 100                                     | 0                    | 1                   |                       | C8H9ClNO                                           | 170.0367   | C8H9[37]ClNO | 172.0337   | C6H8N              | 94.0651    |
| Propamocarb                                                                                                               | C9H20N2O2         | 5.20  | 188.15248 | 11      | 1     | 100                                     | 0                    | 1                   | 23                    | C4H8NO2                                            | 102.0550   | C7H14O2N     | 144.1019   |                    |            |
| Propanil                                                                                                                  | C9H9Cl2NO         | 10.41 | 217.00612 | 10      | 65    | 100                                     | 0                    | 0                   |                       | C6H6Cl2N                                           | 161.9872   |              |            |                    |            |
| Propaphos                                                                                                                 | C13H21O4PS        | 11.28 | 304.08982 | 16      | 6     | 100                                     | 1                    | 1                   |                       | C10H16O4PS                                         | 263.0501   | C7H10O4PS    | 221.0032   |                    |            |
| Propargite                                                                                                                | C19H26O4S         | 13.22 | 350.15518 | 22      | 7     | 1                                       | 100                  | 10                  |                       | C12H15O                                            | 175.1174   | C16H23O      | 231.1743   |                    |            |

| Exactive pesticide screening database (Supplemental Information Mol et al, Analytical and Bioanalytical Chemistry (2012)) |                   |           |           |         |       |                                         |                      |                     |              |                                                    |            |                |            |                |            |
|---------------------------------------------------------------------------------------------------------------------------|-------------------|-----------|-----------|---------|-------|-----------------------------------------|----------------------|---------------------|--------------|----------------------------------------------------|------------|----------------|------------|----------------|------------|
| Analyte                                                                                                                   | Molecular formula | RT<br>min | [M] (a)   | RIA (b) |       | Rel. abundance ESI <sup>+</sup> adducts |                      |                     | Fragment     | Fragments (Exactive Orbitrap using HCD cell 30 eV) |            |                |            |                |            |
|                                                                                                                           |                   |           |           | [M+1]   | [M+2] | [M+H] <sup>+</sup>                      | [M+NH4] <sup>+</sup> | [M+Na] <sup>+</sup> | Rel. Int (c) | Fragment 1                                         | Fragment 1 | Fragment 2     | Fragment 2 | Fragment 3     | Fragment 3 |
| Propazine                                                                                                                 | C9H16ClN5         | 10.44     | 229.10942 | 12      | 32    | 100                                     |                      | 1                   |              | C6H11ClN5                                          | 188.0697   | C3H5ClN5       | 146.0228   |                |            |
| Propetamphos                                                                                                              | C10H20NO4PS       | 10.63     | 281.08507 | 13      | 6     | 100                                     | 25                   | 20                  |              |                                                    |            |                |            |                |            |
| Propham                                                                                                                   | C10H13NO2         | 9.59      | 179.09463 | 12      | 1     | 100                                     | 10                   |                     |              |                                                    |            |                |            |                |            |
| Propiconazole                                                                                                             | C15H17Cl2N3O2     | 11.54     | 341.06978 | 18      | 66    | 100                                     | 0                    | 3                   | 68           | C7H5Cl2                                            | 158.9763   | C7H5Cl[37]Cl   | 160.9733   |                |            |
| Propoxur                                                                                                                  | C11H15NO3         | 8.74      | 209.10519 | 13      | 1     | 100                                     | 1                    | 1                   | 26           | C6H5O                                              | 93.0335    | C6H7O2         | 111.0441   |                |            |
| Propoxycarbazone                                                                                                          | C15H18N4O7S       | 7.28      | 398.08962 | 19      | 7     | 100                                     | 5                    | 10                  |              | C8H7O3S                                            | 199.0060   | C3H6N3O2       | 116.0455   |                |            |
| Propyzamide                                                                                                               | C12H11Cl2NO       | 10.75     | 255.02177 | 14      | 65    | 100                                     | 0                    | 15                  | 18           | C7H6Cl2NO                                          | 189.9821   | C7H3Cl2O       | 172.9555   | C7H6Cl[37]ClNO | 191.9791   |
| Proquinazid                                                                                                               | C14H17IN2O2       | 14.63     | 372.03348 | 16      | 2     | 100                                     | 0                    | 1                   |              |                                                    |            |                |            |                |            |
| Prosulfocarb                                                                                                              | C14H21NOS         | 12.28     | 251.13439 | 17      | 6     | 100                                     | 0                    | 1                   |              | C7H7                                               | 91.0542    | C7H14NO        | 128.1070   |                |            |
| Prosulfuron                                                                                                               | C15H16F3N5O4S     | 10.25     | 419.08751 | 20      | 7     | 100                                     |                      | 10                  |              |                                                    |            |                |            |                |            |
| Prothioconazole                                                                                                           | C14H15Cl2N3OS     | 11.67     | 343.03129 | 18      | 70    | 100                                     | 0                    | 5                   |              | C12H10Cl                                           | 189.0466   |                |            |                |            |
| Prothiofos                                                                                                                | C11H15Cl2O2PS2    | 12.90     | 343.96282 | 14      | 74    | 100                                     | 0                    | 0                   |              | C6H4Cl2O2PS                                        | 240.9041   |                |            |                |            |
| Prothoate                                                                                                                 | C9H20NO3PS2       | 9.80      | 285.06222 | 12      | 10    | 100                                     | 1                    | 1                   |              |                                                    |            |                |            |                |            |
| Pymetrozine                                                                                                               | C10H11N5O         | 5.80      | 217.09636 | 13      | 1     | 100                                     | 0                    | 1                   | 84           | C6H5N2                                             | 105.0447   |                |            |                |            |
| Pyracarbolid                                                                                                              | C13H15NO2         | 9.01      | 217.11028 | 15      | 1     | 100                                     | 0                    | 1                   |              |                                                    |            |                |            |                |            |
| Pyraclufos                                                                                                                | C14H18ClN2O3PS    | 11.64     | 360.04643 | 17      | 38    | 100                                     | 0                    | 1                   |              | C7H5ClN                                            | 138.0105   |                |            |                |            |
| Pyraclostrobin                                                                                                            | C19H18ClN3O4      | 11.58     | 387.09858 | 22      | 35    | 100                                     |                      | 8                   |              | C9H9NO2                                            | 163.0628   | C10H12NO3      | 194.0181   |                |            |
| Pyraflufen-ethyl                                                                                                          | C15H13Cl2F3N2O4   | 11.31     | 412.02045 | 18      | 66    | 100                                     | 0                    | 10                  |              | C12H8Cl2F3N2O2                                     | 338.9909   | C9H9ClF3N2O    | 253.0350   |                |            |
| Pyrazophos                                                                                                                | C14H20N3O5PS      | 11.85     | 373.08613 | 18      | 7     | 100                                     | 0                    | 1                   | 37           | C10H12N3O3                                         | 222.0873   | C8H17O3NPS     | 238.0661   |                |            |
| Pyrethrin I                                                                                                               | C21H28O3          | 13.49     | 328.20385 | 24      | 3     | 100                                     | 50                   | 25                  |              |                                                    |            |                |            |                |            |
| Pyrethrin II                                                                                                              | C22H28O5          | 12.00     | 372.19367 | 25      | 4     | 95                                      | 100                  | 25                  |              |                                                    |            |                |            |                |            |
| Pyridaben                                                                                                                 | C19H25ClN2OS      | 14.43     | 364.13761 | 23      | 39    | 100                                     | 0                    | 5                   | 152          | C11H15                                             | 147.1168   | C15H18ClN2OS   | 309.0823   |                |            |
| Pyridalyl                                                                                                                 | C18H14Cl4F3NO3    | 17.60     | 488.96799 | 20      | 130   | 100                                     |                      | 20                  |              |                                                    |            |                |            |                |            |
| Pyridaphenthion                                                                                                           | C14H17N2O4PS      | 10.60     | 340.06467 | 17      | 7     | 100                                     | 1                    | 10                  |              | C10H9N2O2                                          | 189.0659   |                |            |                |            |
| Pyridate                                                                                                                  | C19H23ClN2O2S     | 15.35     | 378.11688 | 23      | 39    | 100                                     | 0                    | 0                   | 75           | C10H8ON2Cl                                         | 207.0320   | C10H8ON2[37]Cl | 209.0290   |                |            |
| Pyridate metabolite<br>(6-chloro-3-phenylpyridazin-<br>4-ol)                                                              | C10H7ClN2O        | 8.39      | 206.02469 | 12      | 33    | 100                                     |                      | 5                   |              | C7H6N                                              | 104.0495   |                |            |                |            |
| Pyrifenoxy                                                                                                                | C14H12Cl2N2O      | 11.08     | 294.03267 | 16      | 65    | 100                                     | 0                    | 0                   |              |                                                    |            |                |            |                |            |
| Pyrimethanil                                                                                                              | C12H13N3          | 10.49     | 199.11095 | 14      | 1     | 100                                     | 0                    | 0                   |              |                                                    |            |                |            |                |            |
| Pyrimidifen                                                                                                               | C20H28ClN3O2      | 13.08     | 377.18701 | 24      | 35    | 100                                     | 0                    | 1                   |              |                                                    |            |                |            |                |            |
| Pyriproxyfen                                                                                                              | C20H19NO3         | 12.80     | 321.13649 | 23      | 3     | 100                                     | 0                    | 3                   |              | C5H6NO                                             | 96.0444    | C12H9O2        | 185.0597   | C15H15O2       | 227.1067   |
| Pyroquilon                                                                                                                | C11H11NO          | 8.61      | 173.08406 | 13      | 1     | 100                                     | 0                    | 1                   |              |                                                    |            |                |            |                |            |
| Quinalphos                                                                                                                | C12H15N2O3PS      | 11.53     | 298.05410 | 15      | 6     | 100                                     | 0                    | 1                   |              | C8H7N2O                                            | 147.0553   | C8H7N2S        | 163.0324   |                |            |
| Quinlorac                                                                                                                 | C10H5Cl2NO2       | 7.67      | 240.96973 | 12      | 65    | 100                                     |                      | 8                   |              |                                                    |            |                |            |                |            |
| Quinmerac                                                                                                                 | C11H8ClNO2        | 7.09      | 221.02436 | 13      | 33    | 100                                     |                      | 5                   |              |                                                    |            |                |            |                |            |
| Quinoclamine                                                                                                              | C10H6ClNO2        | 8.55      | 207.00871 | 12      | 33    | 100                                     | 1                    | 0                   |              |                                                    |            |                |            |                |            |
| Quinoxifen                                                                                                                | C15H8Cl2FNO       | 13.16     | 306.99670 | 17      | 65    | 100                                     | 0                    | 0                   |              | C9H3Cl2O                                           | 196.9555   |                |            |                |            |
| Quizalofop                                                                                                                | C17H13ClN2O4      | 11.06     | 344.05639 | 20      | 35    | 100                                     | 0                    | 3                   |              |                                                    |            |                |            |                |            |
| Quizalofop-ethyl                                                                                                          | C19H17ClN2O4      | 12.44     | 372.08769 | 22      | 35    | 100                                     | 1                    | 10                  |              | C16H12ClN2O2                                       | 299.0582   | C14H8ClN2O2    | 271.0269   |                |            |
| Resmethrin                                                                                                                | C22H26O3          | 14.57     | 338.18820 | 25      | 3     | 100                                     | 0                    | 1                   |              | C12H11O                                            | 171.0804   | C11H11         | 143.0855   | C10H8          | 128.0621   |
| Rimsulfuron                                                                                                               | C14H17N5O7S2      | 9.08      | 431.05694 | 19      | 12    | 100                                     |                      | 10                  |              |                                                    |            |                |            |                |            |
| Rotenone                                                                                                                  | C23H22O6          | 11.12     | 394.14164 | 26      | 4     | 100                                     | 0                    | 15                  | 1            | C13H9O3                                            | 213.0546   | C11H12O3       | 192.0781   |                |            |
| Sethoxydim                                                                                                                | C17H29NO3S        | 12.73     | 327.18682 | 20      | 7     | 100                                     | 0                    | 1                   |              |                                                    |            |                |            |                |            |
| Silafluofen                                                                                                               | C25H29FO2Si       | 11.83     | 408.19209 | 33      | 7     | 100                                     |                      |                     |              |                                                    |            |                |            |                |            |
| Silthiofam                                                                                                                | C13H21NOSSi       | 11.35     | 267.11131 | 21      | 9     | 100                                     | 0                    | 1                   |              | C7H5SO                                             | 139.0212   |                |            |                |            |
| Simazine                                                                                                                  | C7H12ClN5         | 8.97      | 201.07812 | 10      | 32    | 100                                     |                      |                     | 5            | C6H10N3                                            | 124.0869   | C4H7ClN3       | 132.0323   |                |            |
| Simeconazole                                                                                                              | C14H20FN3OSi      | 10.85     | 293.13597 | 22      | 5     | 100                                     | 0                    | 0                   |              |                                                    |            |                |            |                |            |

| Exactive pesticide screening database (Supplemental Information Mol et al, Analytical and Bioanalytical Chemistry (2012)) |                   |       |           |       |                                         |                    |                      |                     |                                                    |            |            |               |            |            |            |
|---------------------------------------------------------------------------------------------------------------------------|-------------------|-------|-----------|-------|-----------------------------------------|--------------------|----------------------|---------------------|----------------------------------------------------|------------|------------|---------------|------------|------------|------------|
| Analyte                                                                                                                   | Molecular formula | RT    | RIA (b)   |       | Rel. abundance ESI <sup>+</sup> adducts |                    |                      | Fragment            | Fragments (Exactive Orbitrap using HCD cell 30 eV) |            |            |               |            |            |            |
|                                                                                                                           |                   | min   | [M] (a)   | [M+1] | [M+2]                                   | [M+H] <sup>+</sup> | [M+NH4] <sup>+</sup> | [M+Na] <sup>+</sup> | Rel. Int (c)                                       | Fragment 1 | Fragment 1 | Fragment 2    | Fragment 2 | Fragment 3 | Fragment 3 |
| Spinosyn A                                                                                                                | C41H65NO10        | 11.93 | 731.46085 | 47    | 12                                      | 100                | 0                    | 1                   | 170                                                | C7H16NO    | 142.1226   | C6H12N        | 98.0964    |            |            |
| Spinosyn B                                                                                                                | C40H63NO10        | 10.97 | 717.44520 | 46    | 12                                      | 100                | 0                    | 0                   |                                                    | C7H16NO    | 142.1226   | C6H12N        | 98.0964    |            |            |
| Spinosyn D                                                                                                                | C42H67NO10        | 12.48 | 745.47650 | 48    | 13                                      | 100                | 0                    | 0                   | 166                                                | C7H16NO    | 142.1226   | C6H12N        | 98.0964    |            |            |
| Spinosyn K                                                                                                                | C40H63NO10        | 10.97 | 717.44520 | 46    | 12                                      | 100                | 0                    | 0                   |                                                    | C7H16NO    | 142.1226   | C6H12N        | 98.0964    |            |            |
| Spirodiclofen                                                                                                             | C21H24Cl2O4       | 13.84 | 410.10517 | 24    | 67                                      | 100                | 10                   | 10                  |                                                    |            |            |               |            |            |            |
| Spiromesifen                                                                                                              | C23H30O4          | 13.26 | 370.21441 | 26    | 4                                       | 100                | 80                   | 80                  |                                                    | C17H21O3   | 273.1485   | C17H19O2      | 255.1380   |            |            |
| Spirotetramat                                                                                                             | C21H37NO5         | 10.73 | 383.26717 | 24    | 4                                       | 100                | 0                    | 10                  |                                                    |            |            |               |            |            |            |
| Spiroxamine                                                                                                               | C18H35NO2         | 9.79  | 297.26678 | 21    | 2                                       | 100                | 0                    | 0                   | 60                                                 | C8H18NO    | 144.1383   | C6H14N        | 100.1121   |            |            |
| Strychnine                                                                                                                | C21H22N2O2        | 5.62  | 334.16813 | 24    | 3                                       | 100                | 0                    | 1                   |                                                    |            |            |               |            |            |            |
| Sulcotrione                                                                                                               | C14H13ClO5S       | 7.02  | 328.01722 | 17    | 39                                      | 50                 | 100                  | 20                  | 4                                                  | C14H13O5S  | 293.0478   |               |            |            |            |
| Sulfosulfuron                                                                                                             | C16H18N6O7S2      | 10.21 | 470.06784 | 22    | 12                                      | 100                |                      | 25                  |                                                    | C9H11N2O2S | 211.0536   |               |            |            |            |
| Sulfotep                                                                                                                  | C8H20O5P2S2       | 11.32 | 322.02274 | 11    | 10                                      | 100                | 3                    | 1                   |                                                    | H4PO3S     | 114.9613   | C2H8O3PS      | 142.9926   | C4H12O3PS  | 171.0239   |
| Sulprofos                                                                                                                 | C12H19O2PS3       | 13.03 | 322.02848 | 16    | 15                                      | 100                | 1                    | 0                   |                                                    | C7H8O2PS2  | 218.9698   |               |            |            |            |
| Tebuconazole                                                                                                              | C16H22ClN3O       | 11.44 | 307.14514 | 19    | 34                                      | 100                | 0                    | 0                   | 5                                                  | C2H4N3     | 70.0400    |               |            |            |            |
| Tebufenozide                                                                                                              | C22H28N2O2        | 11.14 | 352.21508 | 25    | 3                                       | 100                | 1                    | 10                  | 358                                                | C9H9O      | 133.0648   | C8H9          | 105.0699   |            |            |
| Tebufenpyrad                                                                                                              | C18H24ClN3O       | 12.51 | 333.16079 | 21    | 34                                      | 100                | 0                    | 5                   |                                                    | C6H10N2Cl  | 145.0527   | C6H10N2[37]Cl | 147.0498   | C7H8ON2Cl  | 171.0320   |
| Tebupirimifos                                                                                                             | C13H23N2O3PS      | 12.76 | 318.11670 | 16    | 6                                       | 100                | 0                    | 0                   |                                                    |            |            |               |            |            |            |
| Tebuthiuron                                                                                                               | C9H16N4OS         | 9.15  | 228.10448 | 12    | 5                                       | 100                | 0                    | 15                  |                                                    |            |            |               |            |            |            |
| Tecnazene                                                                                                                 | C6HCl4NO2         | 10.42 | 258.87614 | 7     | 128                                     | 100                | 0                    | 0                   |                                                    |            |            |               |            |            |            |
| Teflubenzuron                                                                                                             | C14H6Cl2F4N2O2    | 12.70 | 379.97425 | 16    | 66                                      | 5                  | 0                    | 100                 |                                                    | C7H6ONF2   | 158.0412   |               |            |            |            |
| Temephos                                                                                                                  | C16H20O6P2S3      | 12.36 | 465.98973 | 21    | 16                                      | 60                 | 100                  | 10                  |                                                    |            |            |               |            |            |            |
| Tepraloxymid                                                                                                              | C17H24ClNO4       | 10.41 | 341.13939 | 20    | 35                                      | 100                | 0                    | 0                   | 21                                                 | C14H20NO3  | 250.1438   | C9H12NO2      | 166.0863   |            |            |
| Terbacil                                                                                                                  | C9H13ClN2O2       | 9.23  | 216.06656 | 11    | 33                                      | 0                  | 0                    | 100                 |                                                    | C5H3ClNO2  | 143.9847   |               |            |            |            |
| Terbufos                                                                                                                  | C9H21O2PS3        | 12.59 | 288.04413 | 13    | 14                                      | 100                | 0                    | 0                   |                                                    | C4H12O2PS2 | 187.0010   | C5H11S        | 103.0576   |            |            |
| Terbufos-sulfone                                                                                                          | C9H21O4PS3        | 10.16 | 320.03396 | 13    | 15                                      | 100                | 90                   | 5                   |                                                    |            |            |               |            |            |            |
| Terbufos-sulfoxide                                                                                                        | C9H21O3PS3        | 10.19 | 304.03905 | 13    | 15                                      | 100                | 1                    | 1                   |                                                    | C4H12O2PS2 | 187.0010   |               |            |            |            |
| Terbumeton                                                                                                                | C10H19N5O         | 10.44 | 225.15896 | 13    | 1                                       | 100                | 1                    | 1                   |                                                    | C6H12N5O   | 170.1036   |               |            |            |            |
| Terbuthylazine                                                                                                            | C9H16ClN5         | 10.55 | 229.10942 | 12    | 32                                      | 100                | 0                    | 0                   |                                                    | C5H9ClN5   | 174.0541   | C5H9[37]ClN5  | 176.0511   | C4H6N3     | 96.0556    |
| Terbutryn                                                                                                                 | C10H19N5S         | 10.71 | 241.13612 | 14    | 5                                       | 100                | 0                    | 0                   |                                                    | C6H12N5S   | 186.0808   | C3H6N3S       | 116.0277   | C2H7N2S    | 91.0324    |
| Tetrachlorvinphos                                                                                                         | C10H9Cl4O4P       | 11.23 | 363.89926 | 11    | 129                                     | 100                | 0                    | 0                   |                                                    | C2H8PO4    | 127.0155   |               |            |            |            |
| Tetraconazole                                                                                                             | C13H11Cl2F4N3O    | 10.78 | 371.02153 | 16    | 65                                      | 100                | 0                    | 0                   |                                                    | C7H5Cl2    | 158.9763   | C2H4N3        | 70.0400    |            |            |
| Tetradifon                                                                                                                | C12H6Cl4O2S       | 12.51 | 353.88426 | 14    | 134                                     | 0                  | 100                  | 25                  |                                                    |            |            |               |            |            |            |
| Tetramethrin                                                                                                              | C19H25NO4         | 12.43 | 331.17836 | 22    | 3                                       | 100                | 1                    | 50                  |                                                    | C9H10NO2   | 164.0706   |               |            |            |            |
| Tetramethrin I                                                                                                            | C19H25NO4         | 12.51 | 331.17836 | 22    | 3                                       | 100                | 90                   | 50                  |                                                    |            |            |               |            |            |            |
| Tetramethrin II                                                                                                           | C19H25NO4         | 12.33 | 331.17836 | 22    | 3                                       | 100                | 90                   | 50                  |                                                    |            |            |               |            |            |            |
| Thiabendazole                                                                                                             | C10H7N3S          | 8.32  | 201.03607 | 13    | 5                                       | 100                | 0                    | 1                   | 32                                                 | C9H7N2S    | 175.0324   | C8H7N2        | 131.0637   |            |            |
| Thiabendazole 5-hydroxy                                                                                                   | C10H7N3OS         | 5.54  | 217.03098 | 13    | 5                                       | 100                |                      | 1                   |                                                    |            |            |               |            |            |            |
| Thiacloprid                                                                                                               | C10H9ClN4S        | 7.55  | 252.02365 | 13    | 37                                      | 100                | 2                    | 5                   | 86                                                 | C6H5ClN    | 126.0105   | C6H5[37]ClN   | 128.0076   | C8H9ClN    | 186.0139   |
| Thiamethoxam                                                                                                              | C8H10ClN5O3S      | 6.20  | 291.01929 | 12    | 37                                      | 100                | 1                    | 2                   | 34                                                 | C7H9N4S    | 181.0542   | C8H11N4OS     | 211.0648   | C4H3NClS   | 131.9669   |
| Thifensulfuron                                                                                                            | C11H11N5O6S2      | 8.04  | 373.01508 | 16    | 11                                      | 100                | 0                    | 15                  |                                                    |            |            |               |            |            |            |
| Thifensulfuron-Methyl                                                                                                     | C12H13N5O6S2      | 8.46  | 387.03073 | 17    | 11                                      | 100                |                      | 20                  |                                                    | C6H7N4O2   | 167.0564   | C5H9ON4       | 141.0771   | C6H5O4S2   | 204.9624   |
| Thiobencarb                                                                                                               | C12H16ClNOS       | 11.83 | 257.06411 | 15    | 38                                      | 100                | 0                    | 0                   |                                                    |            |            |               |            |            |            |
| Thiocyclam                                                                                                                | C5H11NS3          | 7.60  | 181.00537 | 8     | 14                                      | 100                | 0                    | 0                   | 3                                                  | C3H5S3     | 136.9548   | C3H3S2        | 102.9671   |            |            |
| Thiodicarb                                                                                                                | C10H18N4O4S3      | 9.11  | 354.04902 | 15    | 15                                      | 100                | 0                    | 30                  | 87                                                 | C3H6NS     | 88.0215    | CH4O2N2S      | 107.9988   |            |            |
| Thiofanox                                                                                                                 | C9H18N2O2S        | 9.43  | 218.10890 | 12    | 5                                       | 0                  | 0                    | 100                 |                                                    |            |            |               |            |            |            |
| Thiofanox-sulfone                                                                                                         | C9H18N2O4S        | 6.97  | 250.09873 | 12    | 6                                       | 90                 | 100                  | 25                  |                                                    |            |            |               |            |            |            |
| Thiofanox-sulfoxide                                                                                                       | C9H18N2O3S        | 6.74  | 234.10381 | 12    | 6                                       | 100                | 25                   | 1                   |                                                    |            |            |               |            |            |            |
| Thiometon                                                                                                                 | C6H15O2PS3        | 9.54  | 245.99718 | 9     | 14                                      | 100                | 10                   | 40                  |                                                    |            |            |               |            |            |            |

| Exactive pesticide screening database (Supplemental Information Mol et al, Analytical and Bioanalytical Chemistry (2012))                                                                           |                   |           |           |         |       |                                         |                      |                     |                          |                                                    |            |             |            |            |            |
|-----------------------------------------------------------------------------------------------------------------------------------------------------------------------------------------------------|-------------------|-----------|-----------|---------|-------|-----------------------------------------|----------------------|---------------------|--------------------------|----------------------------------------------------|------------|-------------|------------|------------|------------|
| Analyte                                                                                                                                                                                             | Molecular formula | RT<br>min | [M] (a)   | RIA (b) |       | Rel. abundance ESI <sup>+</sup> adducts |                      |                     | Fragment<br>Rel. Int (c) | Fragments (Exactive Orbitrap using HCD cell 30 eV) |            |             |            |            |            |
|                                                                                                                                                                                                     |                   |           |           | [M+1]   | [M+2] | [M+H] <sup>+</sup>                      | [M+NH4] <sup>+</sup> | [M+Na] <sup>+</sup> |                          | Fragment 1                                         | Fragment 1 | Fragment 2  | Fragment 2 | Fragment 3 | Fragment 3 |
| Thiometon-sulphone                                                                                                                                                                                  | C6H15O4PS3        | 8.09      | 277.98701 | 9       | 15    | 100                                     | 60                   | 10                  |                          |                                                    |            |             |            |            |            |
| Thionazin                                                                                                                                                                                           | C8H13N2O3PS       | 9.76      | 248.03845 | 11      | 6     | 100                                     |                      | 1                   |                          |                                                    |            |             |            |            |            |
| Thiophanate-methyl                                                                                                                                                                                  | C12H14N4O4S2      | 8.62      | 342.04565 | 17      | 11    | 100                                     | 0                    | 1                   | 87                       | C7H7N2S                                            | 151.0324   |             |            |            |            |
| Thiram                                                                                                                                                                                              | C6H12N2S4         | 8.65      | 239.98834 | 11      | 18    | 100                                     |                      | 1                   |                          |                                                    |            |             |            |            |            |
| Tolclofos methyl                                                                                                                                                                                    | C9H11Cl2O3PS      | 11.72     | 299.95436 | 11      | 70    | 100                                     | 0                    | 0                   |                          | C7H5OCl2                                           | 174.9712   | C8H8Cl2O2PS | 268.9354   |            |            |
| Tolfenpyrad                                                                                                                                                                                         | C21H22ClN3O2      | 12.59     | 383.14006 | 25      | 35    | 100                                     | 0                    | 1                   |                          |                                                    |            |             |            |            |            |
| Tolyfluanid metabolite (DMST)                                                                                                                                                                       | C9H14N2O2S        | 8.84      | 214.07760 | 12      | 5     | 100                                     | 0                    | 15                  |                          |                                                    |            |             |            |            |            |
| Tolyfluanid                                                                                                                                                                                         | C10H13Cl2FN2O2S2  | 11.24     | 345.97796 | 14      | 74    | 100                                     | 75                   | 10                  |                          | C7H7NS                                             | 137.0294   | C8H7NFSCl2  | 237.9655   |            |            |
| Topramezone                                                                                                                                                                                         | C16H17N3O5S       | 5.92      | 363.08889 | 20      | 7     | 100                                     | 20                   | 10                  | 58                       | C15H16O4N3S                                        | 334.0856   |             |            |            |            |
| Tralkoxidym                                                                                                                                                                                         | C20H27NO3         | 13.39     | 329.19909 | 23      | 3     | 100                                     | 0                    | 1                   | 21                       | C7H8O2N                                            | 138.0550   | C7H8ON      | 122.0600   |            |            |
| Triadimefon                                                                                                                                                                                         | C14H16ClN3O2      | 10.62     | 293.09311 | 17      | 34    | 100                                     | 0                    | 5                   |                          | C11H14OCl                                          | 197.0727   |             |            |            |            |
| Triadimenol                                                                                                                                                                                         | C14H18ClN3O2      | 10.78     | 295.10876 | 17      | 34    | 100                                     | 0                    | 1                   |                          | C2H4N3                                             | 70.0400    | C6H11O      | 99.0804    |            |            |
| Triallate                                                                                                                                                                                           | C10H16Cl3NOS      | 13.23     | 303.00182 | 12      | 101   | 0                                       | 100                  | 0                   |                          |                                                    |            |             |            |            |            |
| Triapenthenol                                                                                                                                                                                       | C15H25N3O         | 11.27     | 263.19976 | 18      | 2     | 100                                     | 0                    | 1                   |                          | C2H4N3                                             | 70.0400    | C8H13       | 109.1012   |            |            |
| Triasulfuron                                                                                                                                                                                        | C14H16ClN5O5S     | 8.32      | 401.05607 | 18      | 39    | 100                                     | 0                    | 30                  | 54                       | C6H7O2N4                                           | 167.0564   | C5H9ON4     | 141.0771   | C5H3ON3    | 121.0271   |
| Triazamate                                                                                                                                                                                          | C13H22N4O3S       | 10.89     | 314.14126 | 17      | 6     | 100                                     | 0                    | 5                   |                          |                                                    |            |             |            |            |            |
| Triazophos                                                                                                                                                                                          | C12H16N3O3PS      | 10.68     | 313.06500 | 15      | 6     | 100                                     | 0                    | 2                   |                          | C8H8N3O                                            | 162.0662   | C7H7N2      | 119.0604   |            |            |
| Triazoxide                                                                                                                                                                                          | C10H6ClN5O        | 9.42      | 247.02609 | 13      | 33    | 100                                     | 0                    | 0                   | 2                        | C6H3NCl                                            | 123.9949   |             |            |            |            |
| Trichlorfon                                                                                                                                                                                         | C4H8Cl3O4P        | 7.35      | 255.92258 | 5       | 97    | 100                                     | 35                   | 15                  |                          |                                                    |            |             |            |            |            |
| Tricyclazole                                                                                                                                                                                        | C9H7N3S           | 7.90      | 189.03607 | 12      | 5     | 100                                     | 0                    | 1                   |                          | C8H7N2S                                            | 163.0324   |             |            |            |            |
| Trietazine                                                                                                                                                                                          | C9H16ClN5         | 11.19     | 229.10942 | 12      | 32    | 100                                     | 0                    | 1                   |                          | C4H7ClN3                                           | 132.0323   | C5H11N2     | 99.0917    |            |            |
| Trifenmorph                                                                                                                                                                                         | C23H23NO          | 10.17     | 329.17796 | 26      | 3     | 100                                     | 0                    | 0                   |                          |                                                    |            |             |            |            |            |
| Trifloxystrobin                                                                                                                                                                                     | C20H19F3N2O4      | 11.89     | 408.12969 | 23      | 3     | 100                                     | 0                    | 1                   |                          | C9H7NF3                                            | 186.0525   | C9H9N       | 131.0730   | C9H10N     | 132.0808   |
| Triflumizole                                                                                                                                                                                        | C15H15ClF3N3O     | 12.06     | 345.08558 | 18      | 34    | 100                                     | 0                    | 0                   |                          |                                                    |            |             |            |            |            |
| Triflumuron                                                                                                                                                                                         | C15H10ClF3N2O3    | 11.50     | 358.03321 | 18      | 34    | 100                                     | 0                    | 60                  | ND                       | C7H7ClNO                                           | 156.0211   | C7H4OCl     | 138.9945   |            |            |
| Triflusulfuron-methyl                                                                                                                                                                               | C17H19F3N6O6S     | 10.34     | 492.10389 | 22      | 7     | 100                                     |                      | 25                  |                          |                                                    |            |             |            |            |            |
| Triforine I                                                                                                                                                                                         | C10H14Cl6N4O2     | 9.79      | 431.92479 | 13      | 193   | 20                                      | 0                    | 100                 |                          | C9H12ON3Cl5[37]Cl                                  | 389.9077   |             |            |            |            |
| Triforine II                                                                                                                                                                                        | C10H14Cl6N4O2     | 10.01     | 431.92479 | 13      | 193   | 20                                      | 0                    | 100                 |                          | C9H12ON3Cl5[37]Cl                                  | 389.9077   |             |            |            |            |
| Trimethacarb 2 3 5-                                                                                                                                                                                 | C11H15NO2         | 9.83      | 193.11028 | 13      | 1     | 100                                     | 1                    | 1                   |                          |                                                    |            |             |            |            |            |
| Trinexapac                                                                                                                                                                                          | C11H12O5          | 8.25      | 224.06847 | 12      | 2     | 100                                     | 20                   | 10                  |                          |                                                    |            |             |            |            |            |
| Trinexapac-ethyl                                                                                                                                                                                    | C13H16O5          | 9.97      | 252.09977 | 15      | 2     | 100                                     | 1                    | 1                   |                          | C11H11O4                                           | 207.0652   |             |            |            |            |
| Triticonazole                                                                                                                                                                                       | C17H20ClN3O       | 10.94     | 317.12949 | 20      | 34    | 100                                     | 0                    | 0                   |                          | C2H4N3                                             | 70.0400    | C7H6Cl      | 125.0153   |            |            |
| Vamidothion                                                                                                                                                                                         | C8H18NO4PS2       | 7.02      | 287.04149 | 11      | 10    | 100                                     | 1                    | 8                   |                          | C6H12NOS                                           | 146.0634   | C4H8NOS     | 118.0321   |            |            |
| Vernolate                                                                                                                                                                                           | C10H21NOS         | 12.08     | 203.13439 | 12      | 5     | 100                                     | 0                    | 1                   |                          |                                                    |            |             |            |            |            |
| Warfarin                                                                                                                                                                                            | C19H16O4          | 10.35     | 308.10486 | 21      | 3     | 100                                     | 10                   | 20                  |                          |                                                    |            |             |            |            |            |
| XMC                                                                                                                                                                                                 | C10H13NO2         | 9.24      | 179.09463 | 12      | 1     | 100                                     | 10                   | 5                   | 19                       | C8H11O                                             | 123.0804   |             |            |            |            |
| Zoxamide                                                                                                                                                                                            | C14H16Cl3NO2      | 11.67     | 335.02466 | 16      | 97    | 100                                     | 0                    | 1                   |                          |                                                    |            |             |            |            |            |
| (a) monoisotopic mass                                                                                                                                                                               |                   |           |           |         |       |                                         |                      |                     |                          |                                                    |            |             |            |            |            |
| (b) RIA = relative isotope abundance                                                                                                                                                                |                   |           |           |         |       |                                         |                      |                     |                          |                                                    |            |             |            |            |            |
| (c) Intensity of Fragment-1 relative to main ESI <sup>+</sup> adduct                                                                                                                                |                   |           |           |         |       |                                         |                      |                     |                          |                                                    |            |             |            |            |            |
| Lutz Alder is acknowledged for proposing structures of fragments through the following site:                                                                                                        |                   |           |           |         |       |                                         |                      |                     |                          |                                                    |            |             |            |            |            |
| <a href="http://www.bfr.bund.de/de/parameters_for_the_determination_of_pesticide_residues-5832.html">http://www.bfr.bund.de/de/parameters_for_the_determination_of_pesticide_residues-5832.html</a> |                   |           |           |         |       |                                         |                      |                     |                          |                                                    |            |             |            |            |            |
| This table is part of the supplemental information to the paper entitled:                                                                                                                           |                   |           |           |         |       |                                         |                      |                     |                          |                                                    |            |             |            |            |            |
| Qualitative aspects and validation of a screening method for pesticides in vegetables and fruits based on liquid chromatography coupled to full scan high resolution (Orbitrap) mass spectrometry   |                   |           |           |         |       |                                         |                      |                     |                          |                                                    |            |             |            |            |            |
| Hans G.J. Mol, Paul Zomer, Maarten de Koning, Analytical and Bioanalytical Chemistry (2012)                                                                                                         |                   |           |           |         |       |                                         |                      |                     |                          |                                                    |            |             |            |            |            |

Figure S1. Relative abundance  $[M+Na]^+ / [M+H]^+$  observed for penoxsulam in a sequence of standards and extracts of spiked samples

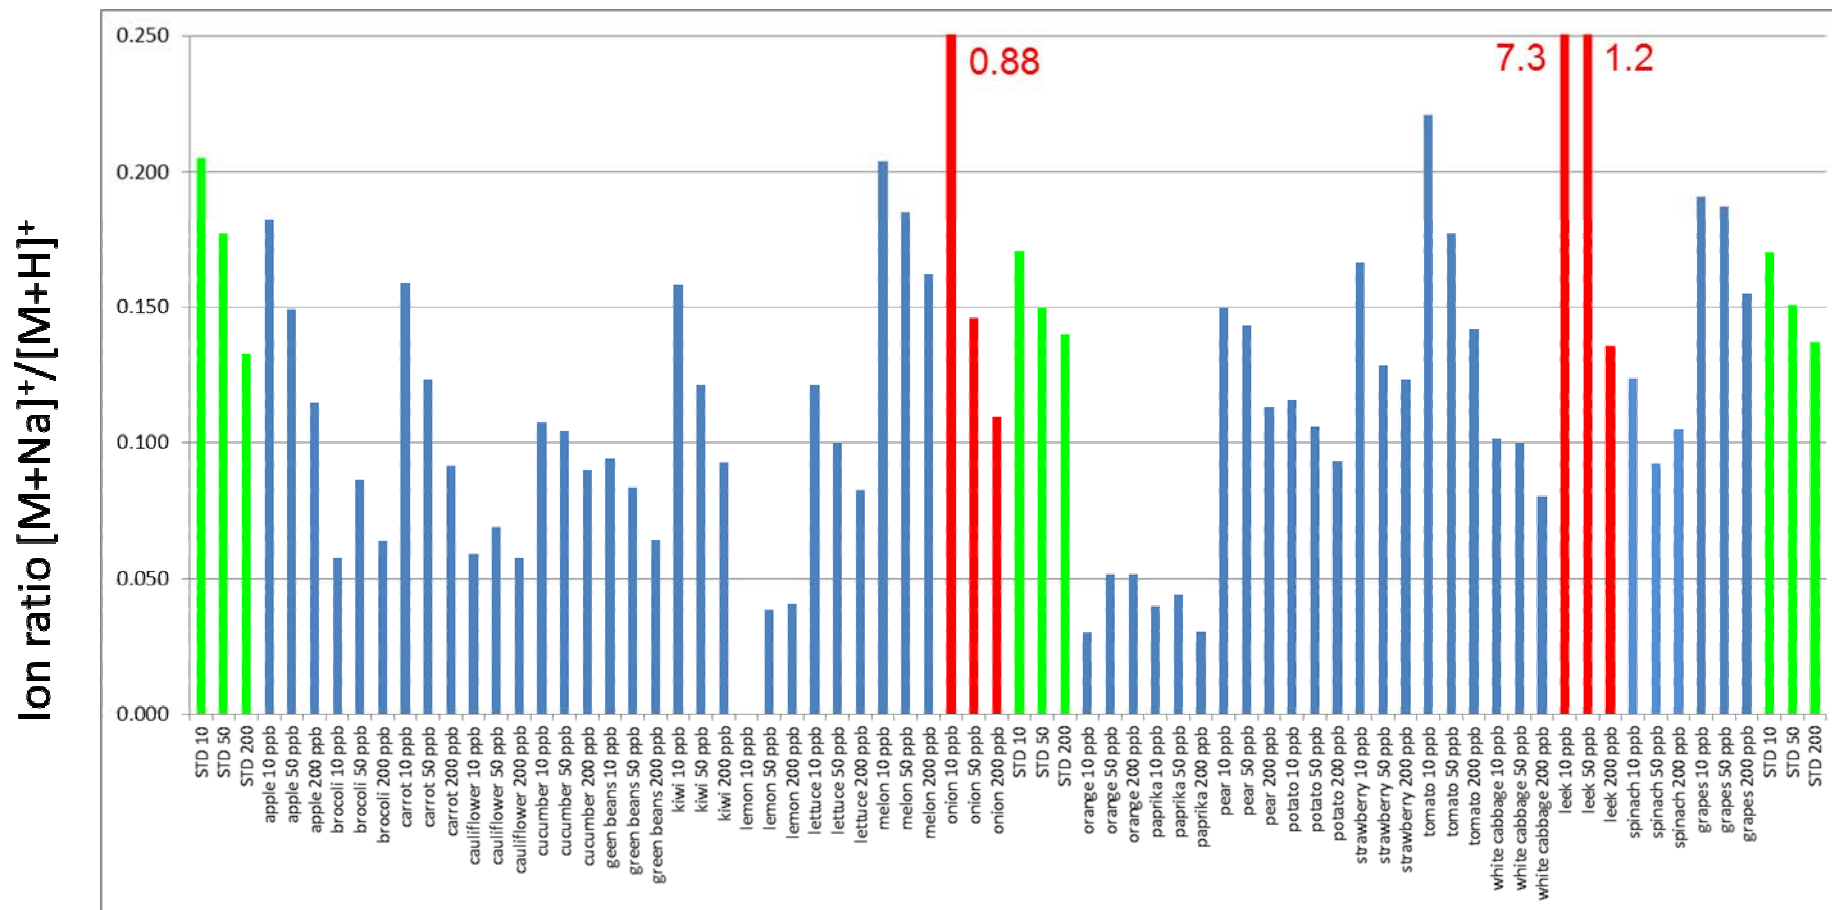

Green: solvent standards, mean ion ratio = 0.159 (RSD 15%)

Blue: spiked samples; 0.109 (RSD 44%)

Red: spiked samples excluded from calculation of average ion ratio/RSD because of an interfering peak for  $[M+Na]^+$  in control matrix

**Figure S2. Experimental vs theoretical isotope ratio for M+1 and M+2 vs monoisotopic ion as function of number of carbon atoms and m/z.**

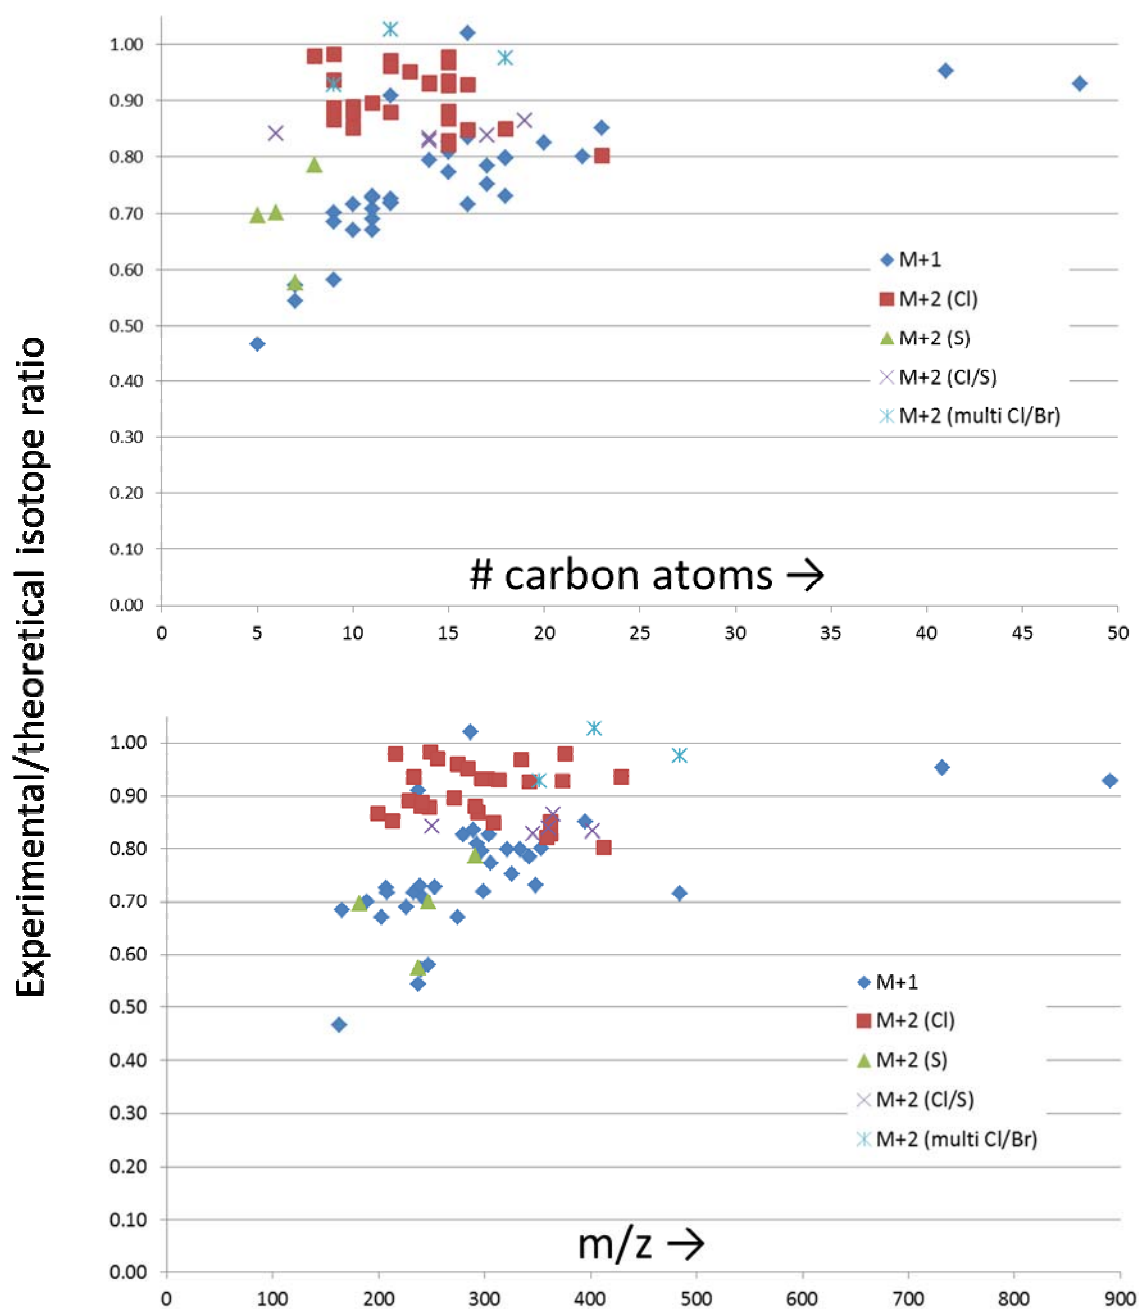

M+1: dominated by  $^{13}\text{C}$

M+2 (Cl): dominated by  $^{37}\text{Cl}$

M+2 (S): dominated by  $^{34}\text{S}$  (analyte does not contain chlorine/bromine)

M+2 (Cl/S): analyte contains sulfur but chlorine is main contributor

M+2 (multi Cl/Br): analyte contains multiple chlorine and/or bromine atoms

**Figure S3. Variability of ion ratio vs relative intensity of fragment ion (upper plot) and response of fragment (lower plot) in solvent standards.**

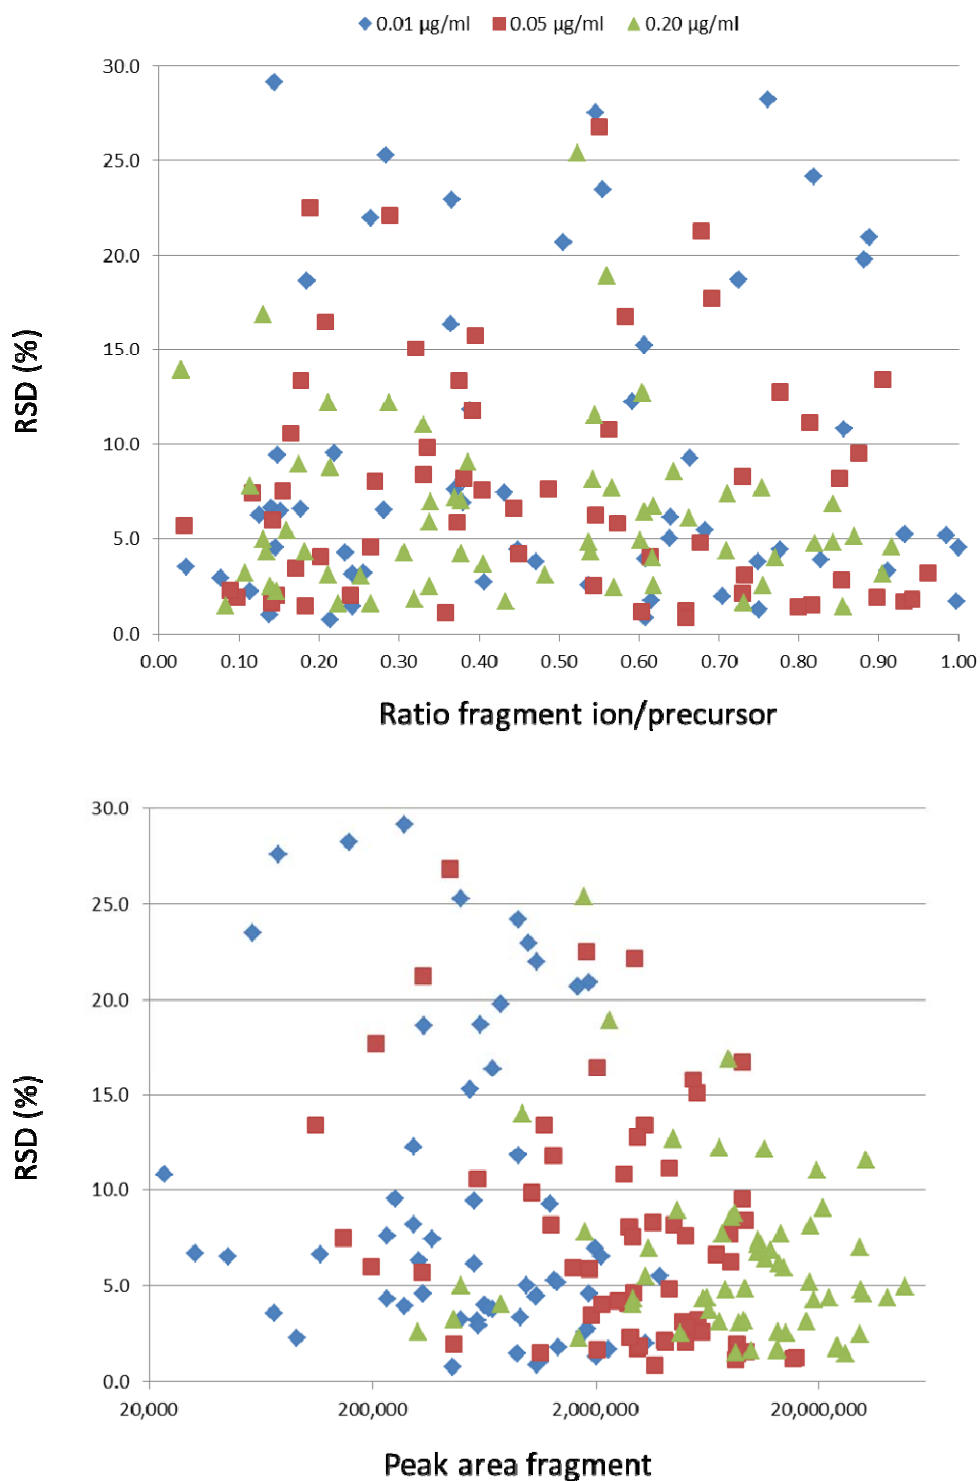

RSD = relative standard deviation (N=3). Each dot represents a pesticide.









**Table S1. Overview of false positives in 21 commodities searched for 556 pesticides based on one exact mass and retention time**

|                           |                | apple | broccoli | carrot | cauliflower | cucumber | grapes | green beans | kiwi | leek | lemon | lettuce | melon | onion | orange | paprika | pear | potato | spinach | strawberry | tomato | white cabbage |    |
|---------------------------|----------------|-------|----------|--------|-------------|----------|--------|-------------|------|------|-------|---------|-------|-------|--------|---------|------|--------|---------|------------|--------|---------------|----|
| Pyroquilon                | C11H11NO       |       |          |        | 5.9         |          |        |             |      |      |       |         |       |       |        |         |      |        |         | 3.1        |        | 3.4           | 3  |
| <b>Rotenone</b>           | C23H22O6       | 19.6  |          |        |             |          |        |             |      |      |       |         |       |       |        |         | 2.6  |        |         |            |        |               | 2  |
| Silaflluofen              | C25H29FO2Si    |       |          |        |             |          |        |             |      |      |       |         |       |       |        |         |      | 11.0   |         |            |        |               | 1  |
| <b>Simazine</b>           | C7H12CIN5      | 5.0   |          | 10.0   | 4.0         |          | 3.3    |             | 5.0  |      |       | 5.1     | 4.4   |       |        |         |      |        | 5.9     | 4.3        | 3.2    | 3.0           | 11 |
| Spirotetramat             | C21H37NO5      |       | 61.1     |        | 22.3        | 21.6     |        | 39.7        |      |      |       | 19.6    |       |       |        |         |      |        | 6.9     |            |        | 12.5          | 7  |
| <b>Sulcotrione</b>        | C14H13ClO5S    |       |          |        | 16.0        |          |        |             |      |      |       |         |       |       |        |         |      |        |         |            |        |               | 1  |
| <b>Tebuconazole</b>       | C16H22CIN3O    |       |          |        |             |          |        |             |      |      |       | 6.7     |       |       |        |         |      |        |         |            |        |               | 1  |
| Terbutylazine             | C9H16CIN5      |       |          |        |             |          |        |             |      |      |       | 11.6    |       |       |        |         |      |        | 27.9    |            |        |               | 2  |
| Tetraconazole             | C13H11Cl2F4N3O |       |          |        |             |          |        |             |      |      |       |         | 21.8  |       |        |         |      |        |         |            |        |               | 1  |
| Tetramethrin              | C19H25NO4      |       |          |        |             |          |        |             |      | 24.2 | 24.7  |         |       |       | 16.2   |         |      |        |         |            |        |               | 3  |
| <b>Thiabendazole</b>      | C10H7N3S       |       |          | 3.0    |             | 5.0      | 1.4    |             | 2.9  |      |       | 4.1     | 5.9   |       |        |         |      |        |         | 5.6        | 2.6    |               | 8  |
| <b>Thiamethoxam</b>       | C8H10CIN5O3S   |       |          |        |             |          |        |             |      |      |       |         |       | 13.1  |        |         |      |        |         |            |        |               | 1  |
| Thiofanox-sulfoxide       | C9H18N2O3S     |       |          |        |             |          |        |             |      | 6.0  |       |         |       |       | 2.1    |         |      |        |         |            |        | 14.7          | 3  |
| <b>Thiophanate-methyl</b> | C12H14N4O4S2   |       |          |        |             |          |        |             |      | 313  |       |         |       | 1,121 |        |         |      |        |         |            |        |               | 2  |
| Triadimenol               | C14H18CIN3O2   |       |          |        |             |          |        |             |      | 16.4 |       |         |       |       | 72.6   |         |      |        |         |            |        |               | 2  |
| Trimethacarb 2 3 5-       | C11H15NO2      | 15.7  | 16.0     | 24.1   | 14.8        | 10.1     | 7.2    | 32.6        | 8.6  | 10.1 | 35.5  | 27.4    | 9.4   | 8.2   | 19.5   | 10.0    | 8.2  | 33.1   | 27.3    | 18.4       | 11.1   | 9.8           | 21 |
| Trinexapac                | C11H12O5       |       |          | 44.4   | 3.0         |          | 16.3   |             | 2.6  |      | 8.4   |         |       | 9.0   | 10.1   | 2.1     | 14.9 | 3.8    |         |            |        | 10.2          | 11 |
| Trinexapac-ethyl          | C13H16O5       |       |          | 6.0    |             |          |        |             |      |      |       |         |       |       |        |         |      |        |         |            |        |               | 1  |
| Warfarin                  | C19H16O4       |       |          | 11.9   |             |          |        |             |      |      |       |         |       |       |        |         |      |        |         |            |        |               | 1  |
| <b>XMC</b>                | C10H13NO2      |       | 20.7     | 2.2    | 4.8         | 6.6      | 3.2    | 9.9         | 3.0  | 4.7  | 4.2   | 6.2     | 4.2   |       |        |         |      | 3.1    | 10.8    |            | 2.9    | 4.1           | 15 |

Search criteria: database retention time  $\pm$  30 s, exact mass  $\pm$  5 ppm (most abundant adduct only).

Confirmed positives were excluded from the list

Pesticides in bold: manually verified; italic (yellow marked): signal is spike rather than chromatographic peak

Values are signal intensities from ToxID divided by 1000. Underlined signal intensities (orange marked): positive for closely eluting isobaric compound (dimethirimol => ethirimol; ethiofencarb-sulfoxide => methiocarb-sulfoxide; propazine => terbutylazine)

**Table S2. Example output automated library-based analyte detection by ToxID for a non-fortified grape sample.**

| Sample Name   |       | grapes (not fortified)                                |                  |          |               |              |             |             |           |            |              |             |
|---------------|-------|-------------------------------------------------------|------------------|----------|---------------|--------------|-------------|-------------|-----------|------------|--------------|-------------|
| Raw File Name |       | D:\USERDATA\Thermo_data\Exa_110909\Exa_110909_115.raw |                  |          |               |              |             |             |           |            |              |             |
| Peak Num      | Index | Compound Name                                         | Formula          | Polarity | Compound Info | Detected m/z | Delta (ppm) | Expected RT | Actual RT | Adduct1 H+ | Adduct2 NH4+ | Adduct3 Na+ |
| 1             | 7     | Simazine                                              | C7H12ClN5        | +        | Parent        | 202.08601    | 3.04        | 8.97        | 8.79      | 3326       | -            | -           |
| 2             | 15    | Imidacloprid                                          | C9H10ClN5O2      | +        | Parent        | 256.05954    | -0.15       | 6.72        | 6.84      | 114858     | -            | -           |
| 3             | 16    | Imidacloprid_isotope                                  | C9H10[37]ClN5O2  | +        | Parent        | 258.05667    | 0.16        | 6.72        | 6.86      | 32569      | -            | -           |
| 4             | 124   | Metazachlor_isotope                                   | C14H16[37]ClN3O  | +        | Parent        | 280.10345    | 3.35        | 9.61        | 9.86      | 3590       | -            | -           |
| 5             | 145   | Dimefuron                                             | C15H19ClN4O3     | +        | Parent        | 339.12082    | -3.02       | 9.95        | 10.44     | 5446       | -            | -           |
| 6             | 180   | Nuarimol_isotope                                      | C17H12[37]ClFN2O | +        | Parent        | 317.0658     | -2.36       | 10.2        | 9.71      | 90615      | -            | -           |
| 7             | 425   | Hymexazol                                             | C4H5NO2          | +        | Parent        | 100.0398     | 4.97        | 5.72        | 5.91      | 2676       | -            | -           |
| 8             | 432   | Cyromazine_isotope                                    | [13]CC5H10N6     | +        | Parent        | 168.10732    | -0.06       | 4.62        | 4.69      | 3445       | -            | -           |
| 9             | 433   | Daminozide                                            | C6H12N2O3        | +        | Parent        | 161.09262    | 3.43        | 4.65        | 4.23      | 1173       | -            | -           |
| 10            | 436   | Aldicarb-sulfone_isotope                              | [13]CC6H14N2O4S  | +        | Parent        | 241.10435    | -1.05       | 5.76        | 5.87      | -          | 4608         | -           |
| 11            | 438   | Butoxycarboxim_isotope                                | [13]CC6H14N2O4S  | +        | Parent        | 241.10435    | -1.05       | 5.64        | 5.87      | -          | 4608         | -           |
| 12            | 466   | Azolamide_isotope                                     | [13]CC7H15N3O2   | +        | Parent        | 187.12631    | -3.99       | 7.84        | 7.49      | 12873      | -            | -           |
| 13            | 467   | Desmetryn                                             | C8H15N5S         | +        | Parent        | 214.11223    | 0.63        | 9.68        | 9.39      | 3304       | -            | -           |
| 14            | 479   | Propamocarb                                           | C9H20N2O2        | +        | Parent        | 189.15923    | -2.8        | 5.2         | 4.85      | 1682       | -            | -           |
| 15            | 497   | Metolcarb                                             | C9H11NO2         | +        | Parent        | 166.08627    | 0.11        | 8.53        | 8.04      | 6556       | -            | -           |
| 16            | 506   | Thiofanox-sulfone_isotope                             | [13]CC8H18N2O4S  | +        | Parent        | 269.13596    | 0.18        | 6.97        | 7.05      | -          | 9704         | -           |
| 17            | 511   | Thiabenzazole                                         | C10H7N3S         | +        | Parent        | 202.0432     | -0.73       | 8.32        | 8.51      | 1400       | -            | -           |
| 18            | 516   | Methabenzthiazuron_isotope                            | [13]CC9H11N3O5   | +        | Parent        | 223.07277    | -0.65       | 9.67        | 9.93      | 3281       | -            | -           |
| 19            | 521   | XMC                                                   | C10H13NO2        | +        | Parent        | 180.10193    | 0.13        | 9.24        | 9.58      | 3176       | -            | -           |
| 20            | 523   | Anabasine                                             | C10H14N2         | +        | Parent        | 163.12273    | -1.52       | 4.6         | 4.81      | 7051       | -            | -           |
| 21            | 529   | Carvone                                               | C10H14O          | +        | Parent        | 151.1114     | -2.23       | 10.13       | 10.57     | 7111       | -            | -           |
| 22            | 534   | Dinoseb_isotope                                       | [13]CC9H12N2O5   | +        | Parent        | 264.06674    | -1.73       | 6.74        | 6.94      | -          | -            | 1638        |
| 23            | 559   | N-2,4-Dimethylphenyl-N'methylformam                   | C10H14N2         | +        | Parent        | 163.12239    | -3.58       | 5.87        | 6.03      | 1432       | -            | -           |
| 24            | 561   | Nicotine                                              | C10H14N2         | +        | Parent        | 163.12296    | -0.12       | 2.58        | 2.59      | 3464       | -            | -           |
| 25            | 573   | Propham                                               | C10H13NO2        | +        | Parent        | 180.10193    | 0.13        | 9.59        | 9.58      | 3176       | -            | -           |
| 26            | 574   | Propham_isotope                                       | [13]CC9H13NO2    | +        | Parent        | 181.10484    | -2.3        | 9.59        | 9.95      | 5083       | -            | -           |
| 27            | 581   | Ethiofencarb-sulfone                                  | C11H15NO4S       | +        | Parent        | 258.07947    | 0.05        | 6.6         | 6.22      | 3219       | -            | -           |
| 28            | 583   | Ethiofencarb-sulfoxide                                | C11H15NO3S       | +        | Parent        | 242.08472    | 0.73        | 6.67        | 6.94      | 117170     | -            | -           |
| 29            | 584   | Ethiofencarb-sulfoxide_isotope                        | [13]CC10H15NO3S  | +        | Parent        | 243.08792    | 0.11        | 6.67        | 6.94      | 10579      | -            | -           |
| 30            | 619   | Isoprocarb                                            | C11H15NO2        | +        | Parent        | 194.11806    | 2.59        | 9.82        | 9.42      | 7180       | -            | -           |
| 31            | 623   | Methiocarb-sulfone                                    | C11H15NO4S       | +        | Parent        | 275.10657    | 2.05        | 7.3         | 7.34      | -          | 2705         | -           |
| 32            | 625   | Methiocarb-sulfoxide                                  | C11H15NO3S       | +        | Parent        | 242.08472    | 0.73        | 6.69        | 6.94      | 117170     | -            | -           |
| 33            | 626   | Methiocarb-sulfoxide_isotope                          | [13]CC10H15NO3S  | +        | Parent        | 243.08792    | 0.11        | 6.69        | 6.94      | 10579      | -            | -           |
| 34            | 637   | Trimethacarb 2 3 5-                                   | C11H15NO2        | +        | Parent        | 194.11806    | 2.59        | 9.83        | 9.42      | 7180       | -            | -           |
| 35            | 639   | Trinexapac                                            | C11H12O5         | +        | Parent        | 225.0759     | 0.65        | 8.25        | 7.76      | 16265      | -            | -           |
| 36            | 643   | Carbofuran                                            | C12H15NO3        | +        | Parent        | 222.11249    | 0.08        | 8.78        | 8.28      | 2575       | -            | -           |
| 37            | 645   | Carbaryl                                              | C12H11NO2        | +        | Parent        | 202.08601    | -1.19       | 8.98        | 8.79      | 3326       | -            | -           |
| 38            | 665   | Carboxin                                              | C12H13NO2S       | +        | Parent        | 236.07391    | -0.26       | 9.08        | 8.96      | 3045       | -            | -           |
| 39            | 669   | Diethyltoluamide                                      | C12H17NO         | +        | Parent        | 192.13838    | 0.47        | 9.81        | 9.86      | 45501      | -            | -           |
| 40            | 673   | Diphenylamine                                         | C12H11N          | +        | Parent        | 170.09642    | -0.03       | 10.8        | 11.04     | 6400       | -            | -           |
| 41            | 677   | Fenfuram                                              | C12H11NO2        | +        | Parent        | 202.08601    | -1.19       | 9.27        | 8.79      | 3326       | -            | -           |
| 42            | 727   | Pyracarbolid                                          | C13H15NO2        | +        | Parent        | 218.11736    | -0.92       | 9.01        | 9.07      | 4108       | -            | -           |
| 43            | 769   | Proquinazid                                           | C14H17IN2O2      | +        | Parent        | 373.0416     | 2.27        | 14.63       | 14.9      | 119007     | -            | -           |
| 44            | 770   | Proquinazid_isotope                                   | [13]CC13H17IN2O2 | +        | Parent        | 374.04462    | 1.38        | 14.63       | 14.86     | 17020      | -            | -           |
| 45            | 783   | Metalaxyl                                             | C15H21NO4        | +        | Parent        | 280.15475    | 1.5         | 9.71        | 9.86      | 1227908    | -            | -           |
| 46            | 784   | Metalaxyl_isotope                                     | [13]CC14H21NO4   | +        | Parent        | 281.15796    | 0.96        | 9.71        | 9.86      | 159973     | -            | -           |
| 47            | 927   | Fenpropimorph                                         | C20H33NO         | +        | Parent        | 304.26379    | 0.99        | 13.78       | 13.95     | 18133      | -            | -           |
| 48            | 928   | Fenpropimorph_isotope                                 | [13]CC19H33NO    | +        | Parent        | 305.26822    | 4.5         | 13.78       | 13.65     | 28767      | -            | -           |
| 49            | 949   | Pyrethrin I                                           | C21H28O3         | +        | Parent        | 329.21106    | -0.19       | 13.49       | 13.54     | 19158      | -            | -           |
| 50            | 986   | Trifenmorph_isotope                                   | [13]CC22H23NO    | +        | Parent        | 331.18805    | -1.65       | 10.17       | 10.58     | 8411       | -            | -           |

**ToxID output after Excel filtering (most abundant adduct + most abundant isotope, delta RT <=0.05 min)**

| Sample Name   |       | grapes (not fortified)                                |                  |          |               |              |             |             |           |            |              |             |
|---------------|-------|-------------------------------------------------------|------------------|----------|---------------|--------------|-------------|-------------|-----------|------------|--------------|-------------|
| Raw File Name |       | D:\USERDATA\Thermo_data\Exa_110909\Exa_110909_115.raw |                  |          |               |              |             |             |           |            |              |             |
| Peak Num      | Index | Compound Name                                         | Formula          | Polarity | Compound Info | Detected m/z | Delta (ppm) | Expected RT | Actual RT | Adduct1 H+ | Adduct2 NH4+ | Adduct3 Na+ |
| 2             | 15    | Imidacloprid                                          | C9H10ClN5O2      | +        | Parent        | 256.05954    | -0.15       | 6.72        | 6.84      | 114858     | -            | -           |
| 3             | 16    | Imidacloprid_isotope                                  | C9H10[37]ClN5O2  | +        | Parent        | 258.05667    | 0.16        | 6.72        | 6.86      | 32569      | -            | -           |
| 28            | 583   | Ethiofencarb-sulfoxide                                | C11H15NO3S       | +        | Parent        | 242.08472    | 0.73        | 6.67        | 6.94      | 117170     | -            | -           |
| 29            | 584   | Ethiofencarb-sulfoxide_isotope                        | [13]CC10H15NO3S  | +        | Parent        | 243.08792    | 0.11        | 6.67        | 6.94      | 10579      | -            | -           |
| 32            | 625   | Methiocarb-sulfoxide                                  | C11H15NO3S       | +        | Parent        | 242.08472    | 0.73        | 6.69        | 6.94      | 117170     | -            | -           |
| 33            | 626   | Methiocarb-sulfoxide_isotope                          | [13]CC10H15NO3S  | +        | Parent        | 243.08792    | 0.11        | 6.69        | 6.94      | 10579      | -            | -           |
| 43            | 769   | Proquinazid                                           | C14H17IN2O2      | +        | Parent        | 373.04160    | 2.27        | 14.63       | 14.9      | 119007     | -            | -           |
| 44            | 770   | Proquinazid_isotope                                   | [13]CC13H17IN2O2 | +        | Parent        | 374.04462    | 1.38        | 14.63       | 14.86     | 17020      | -            | -           |
| 45            | 783   | Metalaxyl                                             | C15H21NO4        | +        | Parent        | 280.15475    | 1.5         | 9.71        | 9.86      | 1227908    | -            | -           |
| 46            | 784   | Metalaxyl_isotope                                     | [13]CC14H21NO4   | +        | Parent        | 281.15796    | 0.96        | 9.71        | 9.86      | 159973     | -            | -           |

**Excel result summary**

| Sample Name            |             | grapes (not fortified)                                |              |             |             |            |            |              |  |  |  |  |
|------------------------|-------------|-------------------------------------------------------|--------------|-------------|-------------|------------|------------|--------------|--|--|--|--|
| Raw File Name          |             | D:\USERDATA\Thermo_data\Exa_110909\Exa_110909_115.raw |              |             |             |            |            |              |  |  |  |  |
| Compound Name          | Formula     | Exp. RT                                               | Detected m/z | Delta (ppm) | Delta (min) | Resp. Quan | Exp. ratio | Theor. ratio |  |  |  |  |
| Ethiofencarb-sulfoxide | C11H15NO3S  | 6.67                                                  | 242.08472    | 0.73        | 0.27        | 117,170    | 0.090      | 0.136        |  |  |  |  |
| Imidacloprid           | C9H10ClN5O2 | 6.72                                                  | 256.05954    | -0.15       | 0.12        | 114,858    | 0.284      | 0.329        |  |  |  |  |
| Metalaxyl              | C15H21NO4   | 9.71                                                  | 280.15475    | 1.5         | 0.15        | 1,227,908  | 0.130      | 0.173        |  |  |  |  |
| Methiocarb-sulfoxide   | C11H15NO3S  | 6.69                                                  | 242.08472    | 0.73        | 0.25        | 117,170    | 0.090      | 0.136        |  |  |  |  |
| Proquinazid            | C14H17IN2O2 | 14.63                                                 | 373.04160    | 2.27        | 0.27        | 119,007    | 0.143      | 0.165        |  |  |  |  |

**Confirmed by LC-MS/MS:** imidacloprid (0.014 mg/kg); metalaxyl (0.021 mg/kg); methiocarb-sulfoxide (0.008 mg/kg), proquinazid (0.021 mg/kg)

**Table S3. Effect of ion ratio tolerance on number of identifications in 21 commodities for 62 pesticides spiked at 0.01 mg/kg, 0.05 mg/kg, 0.20 mg/kg.**

| Compound Name        | RT (min) | quantifier ion | qualifier fragment ion | Detected (a)                 |      |      | Identified (b) |      |      | Identified (c) |      |      |
|----------------------|----------|----------------|------------------------|------------------------------|------|------|----------------|------|------|----------------|------|------|
|                      |          |                |                        | 0.01                         | 0.05 | 0.20 | 0.01           | 0.05 | 0.20 | 0.01           | 0.05 | 0.20 |
|                      |          |                |                        | # detected in 21 commodities |      |      |                |      |      |                |      |      |
| Acephate             | 5.30     | M+H            | C2H9O2PS               | 21                           | 21   | 21   | 11             | 18   | 16   | 19             | 21   | 20   |
| Aldicarb-sulfoxide   | 5.52     | M+H            | C4H9S                  | 20                           | 21   | 21   | 16             | 18   | 16   | 19             | 20   | 20   |
| Amidosulfuron        | 8.03     | M+H            | C7H9N4O5S              | 2                            | 15   | 20   | 2              | 14   | 20   | 2              | 14   | 20   |
| Asulam               | 5.30     | M+NH4          | C6H6O2NS               | 16                           | 20   | 20   | 16             | 20   | 20   | 16             | 20   | 20   |
| Azoxystrobin         | 9.95     | M+H            | C20H14N3O3             | 21                           | 21   | 21   | 15             | 20   | 21   | 21             | 21   | 21   |
| Benzoximate          | 11.65    | C9H8ClO3       | M+H                    | 19                           | 21   | 21   | 15             | 20   | 19   | 19             | 21   | 20   |
| Bifenazate           | 10.60    | M+H            | C12H12N                | 16                           | 21   | 21   | 13             | 14   | 19   | 16             | 20   | 21   |
| Butoxy carbosim      | 5.64     | M+NH4          | C4H8ON                 | 21                           | 21   | 21   | 19             | 19   | 15   | 20             | 21   | 15   |
| Carbaryl             | 8.98     | M+H            | C10H9O                 | 21                           | 21   | 21   | 15             | 16   | 19   | 18             | 21   | 21   |
| Carbendazim          | 7.70     | M+H            | C8H6N3O                | 21                           | 21   | 21   | 17             | 21   | 21   | 21             | 21   | 21   |
| Carbofuran           | 8.78     | M+H            | C10H13O2               | 21                           | 21   | 21   | 16             | 19   | 20   | 19             | 21   | 21   |
| Chlorsulfuron        | 7.90     | M+H            | C5H9N4O                | 20                           | 21   | 21   | 12             | 11   | 14   | 19             | 21   | 21   |
| Chromafenozide       | 10.80    | M+H            | C11H11O2               | 21                           | 21   | 21   | 16             | 20   | 19   | 20             | 21   | 21   |
| Cloquintocet-mexyl   | 12.76    | M+H            | C10H7CINO              | 21                           | 21   | 21   | 19             | 21   | 20   | 21             | 21   | 21   |
| Diafenthiuron        | 13.46    | M+H            | C19H25ON2S             | 11                           | 16   | 19   | 11             | 15   | 17   | 11             | 16   | 19   |
| Diazinon             | 11.61    | M+H            | C8H13N2S               | 21                           | 21   | 21   | 21             | 20   | 21   | 21             | 21   | 21   |
| Difenoconazole       | 11.84    | M+H            | C13H9Cl2O              | 21                           | 21   | 21   | 14             | 17   | 20   | 21             | 21   | 21   |
| Diflufenican         | 11.88    | M+H            | C13H7F3NO2             | 8                            | 18   | 20   | 2              | 13   | 17   | 8              | 17   | 20   |
| Dimethirimol         | 9.59     | M+H            | C8H14NO                | 21                           | 21   | 21   | 20             | 21   | 21   | 20             | 21   | 21   |
| Dimethoate           | 7.30     | M+H            | C2H6O2PS               | 17                           | 21   | 21   | 15             | 20   | 14   | 17             | 21   | 21   |
| Dimethomorph         | 10.41    | M+H            | C17H14O3Cl             | 20                           | 21   | 21   | 14             | 19   | 19   | 20             | 21   | 21   |
| Emamectin B1a        | 11.66    | M+H            | C8H16O2N               | 21                           | 21   | 21   | 13             | 17   | 20   | 21             | 21   | 21   |
| Ethiofencarb         | 9.31     | M+H            | C7H7O                  | 21                           | 21   | 21   | 16             | 19   | 21   | 19             | 21   | 21   |
| Ethirimol            | 9.85     | M+H            | C8H14NO                | 21                           | 21   | 21   | 20             | 21   | 21   | 20             | 21   | 21   |
| Fenamiphos-sulfoxide | 8.62     | M+H            | C8H11O2S               | 19                           | 21   | 21   | 19             | 21   | 21   | 19             | 21   | 21   |
| Fenoxycarb           | 11.09    | M+H            | C3H6NO2                | 21                           | 21   | 21   | 9              | 18   | 20   | 21             | 21   | 21   |
| Flucycloxuron        | 12.97    | M+H            | C8H6ON                 | 5                            | 19   | 21   | 4              | 16   | 20   | 5              | 19   | 21   |
| Flufenacet           | 10.88    | M+H            | C8H7FNO                | 21                           | 21   | 21   | 15             | 18   | 20   | 21             | 21   | 21   |
| Flurprimidol         | 10.43    | M+H            | C12H9O2N2F3            | 18                           | 21   | 21   | 13             | 20   | 20   | 18             | 21   | 21   |
| Furathiocarb         | 12.55    | M+H            | C10H11O2S              | 21                           | 21   | 21   | 19             | 19   | 21   | 21             | 21   | 21   |
| Hexythiazox          | 13.12    | M+H            | C9H11NCI               | 15                           | 20   | 21   | 13             | 19   | 15   | 15             | 20   | 20   |
| Imidacloprid         | 6.72     | M+H            | C9H11N4                | 20                           | 21   | 21   | 17             | 18   | 19   | 20             | 21   | 21   |
| Mesosulfuron-methyl  | 9.22     | M+H            | C7H8O3N3               | 21                           | 21   | 21   | 17             | 20   | 20   | 21             | 21   | 21   |
| Metalaxyl            | 9.71     | M+H            | C11H14N                | 21                           | 21   | 21   | 18             | 20   | 21   | 20             | 21   | 21   |
| Methabenzthiazuron   | 9.67     | M+H            | C8H9N2S                | 21                           | 21   | 21   | 16             | 21   | 21   | 21             | 21   | 21   |
| Methoxyfenozide      | 10.52    | M+H            | C9H9O2                 | 21                           | 21   | 21   | 18             | 20   | 21   | 21             | 20   | 21   |
| Metosulam            | 8.57     | M+H            | C7H7Cl2N               | 21                           | 21   | 21   | 19             | 21   | 21   | 21             | 21   | 21   |
| Metribuzin           | 8.99     | M+H            | C7H15N4S               | 14                           | 21   | 21   | 13             | 21   | 21   | 13             | 21   | 21   |
| Omethoate            | 5.43     | M+H            | C2H6O2PS               | 21                           | 21   | 21   | 20             | 21   | 21   | 20             | 21   | 21   |
| Oxamyl               | 5.76     | M+NH4          | C3H6NO                 | 21                           | 21   | 21   | 18             | 18   | 20   | 21             | 21   | 21   |
| Pencycuron           | 11.82    | M+H            | C7H6Cl                 | 21                           | 21   | 21   | 16             | 21   | 21   | 21             | 21   | 21   |
| Penoxsulam           | 8.64     | M+H            | C7H9O2N5               | 21                           | 21   | 21   | 20             | 20   | 21   | 21             | 21   | 21   |
| Phenmedipham         | 9.87     | M+NH4          | C7H6O2N                | 21                           | 21   | 21   | 17             | 19   | 21   | 21             | 21   | 21   |
| Phosalone            | 11.69    | M+NH4          | C8H5ClNO2              | 19                           | 21   | 21   | 12             | 18   | 20   | 19             | 21   | 21   |
| Pirimiphos-ethyl     | 12.81    | M+H            | C9H16N3S               | 21                           | 21   | 21   | 16             | 19   | 21   | 21             | 21   | 21   |
| Pirimiphos-methyl    | 11.85    | M+H            | C9H14N3                | 21                           | 21   | 21   | 21             | 21   | 21   | 21             | 21   | 21   |
| Propoxur             | 8.74     | M+H            | C6H5O                  | 20                           | 21   | 21   | 16             | 20   | 20   | 20             | 21   | 21   |
| Pymetrozine          | 5.80     | M+H            | C6H5N2                 | 17                           | 18   | 21   | 10             | 16   | 9    | 16             | 18   | 21   |
| Pyrazophos           | 11.85    | M+H            | C10H12N3O3             | 21                           | 21   | 21   | 20             | 20   | 21   | 21             | 21   | 21   |
| Pyridate             | 15.35    | M+H            | C10H8ON2Cl             | 20                           | 21   | 21   | 13             | 14   | 15   | 20             | 21   | 21   |
| Simazine             | 8.97     | M+H 37Cl       | C6H10N3                | 20                           | 21   | 21   | 15             | 21   | 21   | 20             | 21   | 21   |
| Spinosyn A           | 11.93    | M+H            | C7H16NO                | 21                           | 21   | 21   | 12             | 19   | 17   | 20             | 21   | 21   |
| Spinosyn D           | 12.48    | M+H            | C7H16NO                | 8                            | 20   | 21   | 5              | 15   | 20   | 6              | 20   | 21   |
| Spiroxamine          | 9.79     | M+H            | C8H18NO                | 21                           | 21   | 21   | 9              | 18   | 21   | 21             | 20   | 21   |
| Thiabendazole        | 8.32     | M+H            | C9H7N2S                | 21                           | 21   | 21   | 18             | 18   | 21   | 21             | 21   | 21   |
| Thiacloprid          | 7.55     | M+H            | C6H5ClN                | 21                           | 21   | 21   | 16             | 17   | 19   | 21             | 21   | 21   |
| Thiamethoxam         | 6.20     | M+H            | C7H9N4S                | 20                           | 21   | 21   | 16             | 16   | 20   | 20             | 21   | 21   |
| Thiodicarb           | 9.11     | M+H            | C3H6NS                 | 21                           | 21   | 21   | 17             | 20   | 20   | 21             | 21   | 21   |
| Thiophanate-methyl   | 8.62     | M+H            | C7H7N2S                | 21                           | 21   | 21   | 14             | 19   | 21   | 21             | 21   | 21   |
| Topramezone          | 5.92     | M+NH4          | C15H16O4N3S            | 3                            | 18   | 21   | 1              | 15   | 18   | 1              | 18   | 21   |
| Tralkoxidym          | 13.39    | M+H            | C7H8ON                 | 19                           | 21   | 21   | 16             | 19   | 18   | 19             | 21   | 21   |
| XMC                  | 9.24     | M+H            | C8H11O                 | 3                            | 14   | 20   | 2              | 11   | 19   | 2              | 13   | 19   |

(a) based on: exact mass  $\pm$  5 ppm, adduct ion ( $\pm$  30 s of expected retention time) + fragment ( $\leq \pm 0.05$  min of adduct), without ion ratio criteria. (b) using criteria established in EU (see main paper Table 3). (c) using alternative tolerance for ion ratio of  $\pm 50\%$ , independent of relative ion intensity.

**Table S4. Stability of (relative) retention times of pesticides (sequence 124 injections).**

| Compound name          | sample | sample | sample | sample | %dev from ave |      | sample | sample | sample | sample | %dev from ave |         |
|------------------------|--------|--------|--------|--------|---------------|------|--------|--------|--------|--------|---------------|---------|
|                        | ave RT | RSD RT | RT min | RT max | min           | max  |        |        |        |        | RRT           | RRT RSD |
| Flonicamid             | 4.77   | 1.79   | 4.59   | 5.02   | -3.63         | 5.23 | 0.476  | 1.76   | 0.461  | 0.501  | -3.30         | 5.18    |
| Thiocyclam             | 5.23   | 2.30   | 5.00   | 5.45   | -4.35         | 4.21 | 0.523  | 2.25   | 0.502  | 0.544  | -3.85         | 4.12    |
| Propamocarb            | 5.24   | 1.16   | 5.11   | 5.39   | -2.36         | 2.86 | 0.523  | 1.10   | 0.513  | 0.537  | -2.02         | 2.71    |
| Acephate               | 5.24   | 0.85   | 5.14   | 5.34   | -1.86         | 1.80 | 0.524  | 0.79   | 0.516  | 0.533  | -1.48         | 1.87    |
| Omethoate              | 5.44   | 1.10   | 5.31   | 5.58   | -2.33         | 2.68 | 0.543  | 1.01   | 0.533  | 0.557  | -1.87         | 2.51    |
| Aldicarb-sulfoxide     | 5.47   | 1.12   | 5.33   | 5.55   | -2.48         | 1.56 | 0.546  | 1.10   | 0.533  | 0.554  | -2.39         | 1.47    |
| Asulam                 | 5.52   | 0.48   | 5.46   | 5.60   | -1.13         | 1.37 | 0.551  | 0.39   | 0.546  | 0.557  | -1.04         | 0.99    |
| Aldicarb-sulfon        | 5.83   | 0.49   | 5.76   | 5.92   | -1.27         | 1.42 | 0.583  | 0.35   | 0.578  | 0.588  | -0.76         | 0.80    |
| Butoxycarboxim         | 5.83   | 0.49   | 5.76   | 5.92   | -1.27         | 1.42 | 0.583  | 0.35   | 0.578  | 0.588  | -0.76         | 0.80    |
| Oxamyl                 | 5.86   | 0.48   | 5.78   | 5.93   | -1.34         | 1.33 | 0.585  | 0.34   | 0.580  | 0.590  | -0.83         | 0.76    |
| Oxydemeton-methyl      | 6.00   | 0.88   | 5.88   | 6.10   | -2.01         | 1.70 | 0.599  | 0.78   | 0.588  | 0.607  | -1.92         | 1.27    |
| Nitenpyram             | 6.01   | 0.54   | 5.94   | 6.10   | -1.17         | 1.55 | 0.600  | 0.36   | 0.596  | 0.606  | -0.80         | 0.93    |
| Pymetrozine            | 6.02   | 1.34   | 5.90   | 6.19   | -2.10         | 2.67 | 0.602  | 1.32   | 0.590  | 0.617  | -2.00         | 2.49    |
| Methomyl               | 6.25   | 0.45   | 6.18   | 6.34   | -1.11         | 1.36 | 0.625  | 0.32   | 0.618  | 0.630  | -1.01         | 0.85    |
| Thiamethoxam           | 6.30   | 0.45   | 6.22   | 6.39   | -1.24         | 1.46 | 0.629  | 0.30   | 0.624  | 0.634  | -0.81         | 0.84    |
| Topramezone            | 6.31   | 0.55   | 6.24   | 6.40   | -1.03         | 1.46 | 0.630  | 0.51   | 0.624  | 0.636  | -1.03         | 0.96    |
| Ethiofencarb-sulfone   | 6.73   | 0.43   | 6.67   | 6.83   | -0.95         | 1.56 | 0.672  | 0.28   | 0.669  | 0.679  | -0.55         | 0.93    |
| Imazamox               | 6.75   | 0.51   | 6.66   | 6.85   | -1.29         | 1.48 | 0.674  | 0.48   | 0.666  | 0.680  | -1.31         | 0.86    |
| Ethiofencarb-sulfoxide | 6.81   | 0.45   | 6.74   | 6.92   | -1.11         | 1.56 | 0.681  | 0.29   | 0.676  | 0.687  | -0.68         | 0.94    |
| Imidacloprid           | 6.83   | 0.41   | 6.77   | 6.94   | -0.92         | 1.48 | 0.683  | 0.26   | 0.678  | 0.689  | -0.73         | 0.86    |
| Sulcotrione            | 6.94   | 0.40   | 6.90   | 7.05   | -0.55         | 1.58 | 0.694  | 0.33   | 0.690  | 0.700  | -0.56         | 0.96    |
| Clothianidin           | 7.02   | 0.42   | 6.95   | 7.14   | -1.06         | 1.60 | 0.702  | 0.27   | 0.698  | 0.709  | -0.55         | 0.98    |
| Fenuron                | 7.41   | 0.39   | 7.33   | 7.51   | -1.01         | 1.35 | 0.740  | 0.24   | 0.736  | 0.745  | -0.51         | 0.73    |
| Dimethoate             | 7.42   | 0.39   | 7.35   | 7.54   | -0.98         | 1.57 | 0.741  | 0.24   | 0.738  | 0.748  | -0.47         | 0.95    |
| Metamitron             | 7.47   | 0.40   | 7.40   | 7.60   | -1.04         | 1.66 | 0.747  | 0.25   | 0.743  | 0.754  | -0.53         | 1.03    |
| Thiacloprid            | 7.66   | 0.37   | 7.60   | 7.77   | -0.75         | 1.53 | 0.765  | 0.21   | 0.762  | 0.772  | -0.42         | 0.91    |
| Carbendazim            | 7.87   | 0.38   | 7.80   | 7.98   | -0.89         | 1.42 | 0.786  | 0.23   | 0.780  | 0.792  | -0.68         | 0.80    |
| Metoxuron              | 8.24   | 0.34   | 8.16   | 8.36   | -0.96         | 1.40 | 0.823  | 0.18   | 0.820  | 0.830  | -0.44         | 0.78    |
| Chlorsulfuron          | 8.26   | 0.31   | 8.22   | 8.37   | -0.51         | 1.34 | 0.825  | 0.23   | 0.822  | 0.831  | -0.44         | 0.72    |
| Amidosulfuron          | 8.37   | 0.31   | 8.33   | 8.46   | -0.49         | 1.14 | 0.836  | 0.24   | 0.832  | 0.841  | -0.45         | 0.61    |
| Triasulfuron           | 8.43   | 0.30   | 8.38   | 8.55   | -0.57         | 1.47 | 0.842  | 0.16   | 0.839  | 0.849  | -0.27         | 0.84    |
| Thiabendazole          | 8.48   | 0.34   | 8.42   | 8.60   | -0.66         | 1.37 | 0.847  | 0.18   | 0.845  | 0.854  | -0.27         | 0.75    |
| Carbetamide            | 8.57   | 0.30   | 8.52   | 8.68   | -0.58         | 1.24 | 0.856  | 0.15   | 0.854  | 0.862  | -0.30         | 0.61    |
| Cyanazine              | 8.58   | 0.33   | 8.52   | 8.69   | -0.67         | 1.32 | 0.857  | 0.15   | 0.854  | 0.863  | -0.33         | 0.70    |
| Thiophanate-methyl     | 8.74   | 0.30   | 8.67   | 8.85   | -0.77         | 1.29 | 0.873  | 0.15   | 0.870  | 0.879  | -0.32         | 0.67    |
| Fenamiphos-sulfoxide   | 8.75   | 0.27   | 8.70   | 8.85   | -0.53         | 1.17 | 0.874  | 0.12   | 0.872  | 0.879  | -0.23         | 0.55    |
| Metosulam              | 8.78   | 0.27   | 8.72   | 8.89   | -0.66         | 1.26 | 0.877  | 0.14   | 0.875  | 0.883  | -0.26         | 0.64    |
| Pirimicarb_DMF-        | 8.81   | 0.29   | 8.75   | 8.92   | -0.68         | 1.26 | 0.880  | 0.14   | 0.878  | 0.886  | -0.26         | 0.64    |
| Monuron                | 8.85   | 0.27   | 8.80   | 8.96   | -0.57         | 1.20 | 0.884  | 0.12   | 0.883  | 0.890  | -0.19         | 0.58    |
| Propoxur               | 8.87   | 0.25   | 8.82   | 8.96   | -0.55         | 1.02 | 0.886  | 0.11   | 0.884  | 0.890  | -0.18         | 0.41    |
| Carbofuran             | 8.90   | 0.26   | 8.85   | 8.99   | -0.60         | 0.99 | 0.890  | 0.11   | 0.887  | 0.893  | -0.29         | 0.37    |
| Penoxsulam             | 8.94   | 0.22   | 8.90   | 9.02   | -0.51         | 0.90 | 0.893  | 0.12   | 0.891  | 0.896  | -0.28         | 0.28    |
| Imazamethabenz-methyl  | 9.04   | 0.42   | 9.00   | 9.14   | -0.49         | 1.10 | 0.903  | 0.12   | 0.901  | 0.907  | -0.24         | 0.48    |
| Simazine               | 9.08   | 0.26   | 9.03   | 9.17   | -0.61         | 0.97 | 0.908  | 0.11   | 0.906  | 0.911  | -0.19         | 0.35    |
| Carbaryl               | 9.10   | 0.55   | 9.04   | 9.19   | -0.58         | 1.01 | 0.909  | 0.13   | 0.906  | 0.912  | -0.33         | 0.39    |
| Metribuzin             | 9.12   | 0.25   | 9.06   | 9.21   | -0.64         | 0.94 | 0.911  | 0.11   | 0.909  | 0.914  | -0.21         | 0.33    |
| Thiodicarb             | 9.20   | 0.24   | 9.14   | 9.29   | -0.63         | 0.94 | 0.919  | 0.09   | 0.918  | 0.922  | -0.16         | 0.32    |
| Mesosulfuron-methyl    | 9.31   | 0.23   | 9.26   | 9.40   | -0.56         | 0.96 | 0.930  | 0.10   | 0.928  | 0.934  | -0.24         | 0.34    |
| Ethiofencarb           | 9.41   | 0.22   | 9.35   | 9.48   | -0.57         | 0.78 | 0.940  | 0.09   | 0.938  | 0.942  | -0.19         | 0.18    |
| XMC                    | 9.41   | 0.39   | 9.25   | 9.51   | -1.75         | 1.08 | 0.940  | 0.35   | 0.923  | 0.945  | -1.82         | 0.46    |

**Table S4. Stability of (relative) retention times of pesticides (continued).**

| Compound name        | sample | sample | sample | sample | %dev from ave |      | sample                                 | sample  | sample  | sample  | %dev from ave |      |
|----------------------|--------|--------|--------|--------|---------------|------|----------------------------------------|---------|---------|---------|---------------|------|
|                      | ave RT | RSD RT | RT min | RT max | min           | max  | RRT                                    | RRT RSD | RRT min | RRT max | min           | max  |
| Disulfoton-sulfoxide | 9.46   | 0.24   | 9.41   | 9.56   | -0.59         | 1.00 | 0.946                                  | 0.10    | 0.944   | 0.949   | -0.17         | 0.39 |
| Fluometuron          | 9.47   | 0.24   | 9.42   | 9.56   | -0.56         | 0.93 | 0.946                                  | 0.10    | 0.944   | 0.949   | -0.23         | 0.31 |
| Pirimicarb           | 9.64   | 0.23   | 9.58   | 9.72   | -0.53         | 0.92 | 0.963                                  | 0.09    | 0.961   | 0.966   | -0.16         | 0.30 |
| Chlortoluron         | 9.65   | 0.22   | 9.60   | 9.72   | -0.48         | 0.80 | 0.964                                  | 0.08    | 0.962   | 0.966   | -0.14         | 0.20 |
| Dimethirimol         | 9.66   | 0.24   | 9.62   | 9.74   | -0.49         | 0.79 | 0.965                                  | 0.11    | 0.963   | 0.968   | -0.24         | 0.24 |
| Difenoxuron          | 9.77   | 0.21   | 9.71   | 9.84   | -0.52         | 0.77 | 0.976                                  | 0.09    | 0.974   | 0.978   | -0.16         | 0.21 |
| Methabenzthiazuron   | 9.81   | 0.23   | 9.75   | 9.89   | -0.56         | 0.87 | 0.980                                  | 0.09    | 0.978   | 0.982   | -0.19         | 0.25 |
| Metalaxyl            | 9.84   | 0.23   | 9.79   | 9.92   | -0.46         | 0.89 | 0.983                                  | 0.10    | 0.980   | 0.985   | -0.24         | 0.27 |
| Isoproturon          | 9.86   | 0.22   | 9.81   | 9.94   | -0.51         | 0.80 | 0.985                                  | 0.08    | 0.983   | 0.987   | -0.19         | 0.20 |
| Atrazine             | 9.88   | 0.20   | 9.83   | 9.97   | -0.52         | 0.89 | 0.988                                  | 0.09    | 0.986   | 0.990   | -0.18         | 0.27 |
| Ethirimol            | 9.91   | 0.22   | 9.86   | 9.99   | -0.54         | 0.77 | 0.990                                  | 0.08    | 0.989   | 0.992   | -0.19         | 0.17 |
| Triazoxide           | 9.93   | 0.20   | 9.88   | 10.01  | -0.54         | 0.72 | 0.993                                  | 0.09    | 0.991   | 0.995   | -0.14         | 0.25 |
| Phenmedipham         | 9.98   | 0.20   | 9.94   | 10.04  | -0.39         | 0.64 | 0.997                                  | 0.08    | 0.995   | 0.998   | -0.20         | 0.17 |
| Diuron               | 10.01  | 0.20   | 9.96   | 10.07  | -0.51         | 0.65 | taken as RT internal reference analyte |         |         |         |               |      |
| Chlorantraniliprole  | 10.01  | 0.22   | 9.96   | 10.09  | -0.53         | 0.76 | 1.000                                  | 0.09    | 0.998   | 1.002   | -0.19         | 0.16 |
| Spiroxamine          | 10.01  | 0.36   | 9.92   | 10.07  | -0.89         | 0.62 | 1.000                                  | 0.23    | 0.995   | 1.005   | -0.51         | 0.48 |
| Azoxystrobin         | 10.07  | 0.20   | 10.02  | 10.13  | -0.47         | 0.66 | 1.006                                  | 0.10    | 1.005   | 1.008   | -0.10         | 0.24 |
| Clomazone            | 10.24  | 0.21   | 10.20  | 10.32  | -0.40         | 0.79 | 1.023                                  | 0.09    | 1.021   | 1.025   | -0.18         | 0.23 |
| Mandipropamid        | 10.32  | 0.19   | 10.28  | 10.38  | -0.42         | 0.59 | 1.031                                  | 0.08    | 1.029   | 1.034   | -0.19         | 0.23 |
| Isoxaben             | 10.45  | 0.17   | 10.41  | 10.51  | -0.39         | 0.56 | 1.044                                  | 0.09    | 1.041   | 1.045   | -0.27         | 0.14 |
| Methiocarb           | 10.48  | 0.19   | 10.44  | 10.54  | -0.43         | 0.56 | 1.047                                  | 0.10    | 1.045   | 1.049   | -0.21         | 0.18 |
| Linuron              | 10.49  | 0.19   | 10.44  | 10.56  | -0.49         | 0.61 | 1.048                                  | 0.10    | 1.046   | 1.051   | -0.24         | 0.27 |
| Dimethomorph_II      | 10.53  | 0.18   | 10.49  | 10.59  | -0.38         | 0.59 | 1.052                                  | 0.09    | 1.051   | 1.055   | -0.15         | 0.28 |
| Promecarb            | 10.58  | 0.18   | 10.54  | 10.64  | -0.43         | 0.51 | 1.057                                  | 0.08    | 1.055   | 1.059   | -0.24         | 0.18 |
| Flurprimidol         | 10.60  | 0.16   | 10.57  | 10.66  | -0.31         | 0.55 | 1.059                                  | 0.09    | 1.057   | 1.062   | -0.21         | 0.21 |
| Paclbutrazol         | 10.61  | 0.18   | 10.57  | 10.67  | -0.36         | 0.58 | 1.060                                  | 0.09    | 1.058   | 1.062   | -0.17         | 0.18 |
| Methoxyfenozide      | 10.63  | 0.18   | 10.58  | 10.69  | -0.47         | 0.56 | 1.062                                  | 0.09    | 1.060   | 1.064   | -0.15         | 0.24 |
| Tepaloxydim          | 10.69  | 0.15   | 10.65  | 10.73  | -0.34         | 0.43 | 1.068                                  | 0.11    | 1.065   | 1.071   | -0.23         | 0.27 |
| Bifenazate           | 10.70  | 0.15   | 10.65  | 10.75  | -0.40         | 0.47 | 1.069                                  | 0.11    | 1.065   | 1.071   | -0.33         | 0.24 |
| Chloroxuron          | 10.83  | 0.15   | 10.79  | 10.87  | -0.37         | 0.42 | 1.082                                  | 0.10    | 1.079   | 1.084   | -0.24         | 0.25 |
| Propyzamide          | 10.86  | 0.18   | 10.81  | 10.91  | -0.43         | 0.46 | 1.085                                  | 0.10    | 1.082   | 1.088   | -0.21         | 0.26 |
| Haloxyfop            | 10.87  | 0.22   | 10.83  | 10.95  | -0.31         | 0.74 | 1.086                                  | 0.27    | 1.081   | 1.093   | -0.41         | 0.66 |
| Climbazole           | 10.89  | 0.19   | 10.84  | 10.95  | -0.43         | 0.56 | 1.088                                  | 0.10    | 1.084   | 1.091   | -0.33         | 0.27 |
| Chromafenozide       | 10.90  | 0.19   | 10.85  | 10.96  | -0.43         | 0.59 | 1.089                                  | 0.10    | 1.087   | 1.091   | -0.21         | 0.21 |
| Iprovalicarb         | 10.95  | 0.16   | 10.91  | 10.99  | -0.36         | 0.39 | 1.094                                  | 0.10    | 1.091   | 1.096   | -0.31         | 0.19 |
| Fenhexamid           | 10.96  | 0.17   | 10.92  | 11.01  | -0.35         | 0.49 | 1.095                                  | 0.10    | 1.092   | 1.097   | -0.20         | 0.26 |
| Flufenacet           | 10.96  | 0.16   | 10.92  | 11.01  | -0.37         | 0.42 | 1.095                                  | 0.11    | 1.092   | 1.098   | -0.30         | 0.25 |
| Imazalil             | 11.00  | 0.21   | 10.94  | 11.06  | -0.49         | 0.53 | 1.099                                  | 0.11    | 1.096   | 1.102   | -0.28         | 0.27 |
| Fenoxycarb           | 11.17  | 0.16   | 11.13  | 11.21  | -0.37         | 0.36 | 1.116                                  | 0.10    | 1.113   | 1.119   | -0.32         | 0.23 |
| Rotenone             | 11.18  | 0.17   | 11.13  | 11.23  | -0.38         | 0.49 | 1.116                                  | 0.10    | 1.114   | 1.119   | -0.19         | 0.21 |
| Tebufenozide         | 11.21  | 0.16   | 11.17  | 11.26  | -0.35         | 0.45 | 1.120                                  | 0.10    | 1.118   | 1.122   | -0.21         | 0.22 |
| Carfentrazone-ethyl  | 11.39  | 0.16   | 11.35  | 11.45  | -0.33         | 0.53 | 1.138                                  | 0.10    | 1.135   | 1.141   | -0.32         | 0.29 |
| Neburon              | 11.46  | 0.17   | 11.41  | 11.50  | -0.38         | 0.38 | 1.144                                  | 0.10    | 1.141   | 1.147   | -0.29         | 0.26 |
| Tebuconazole         | 11.53  | 0.16   | 11.49  | 11.57  | -0.36         | 0.35 | 1.152                                  | 0.12    | 1.148   | 1.155   | -0.34         | 0.25 |
| Penconazole          | 11.53  | 0.16   | 11.49  | 11.58  | -0.37         | 0.44 | 1.152                                  | 0.11    | 1.148   | 1.155   | -0.36         | 0.23 |
| Carpropamid          | 11.63  | 0.16   | 11.58  | 11.68  | -0.44         | 0.38 | 1.162                                  | 0.11    | 1.159   | 1.166   | -0.27         | 0.30 |
| Triflumuron          | 11.64  | 0.18   | 11.58  | 11.68  | -0.53         | 0.38 | 1.163                                  | 0.15    | 1.158   | 1.167   | -0.41         | 0.41 |
| Propiconazole        | 11.65  | 0.18   | 11.61  | 11.71  | -0.37         | 0.50 | 1.164                                  | 0.11    | 1.161   | 1.166   | -0.27         | 0.19 |
| Phoxim               | 11.65  | 0.17   | 11.61  | 11.70  | -0.37         | 0.41 | 1.164                                  | 0.11    | 1.161   | 1.166   | -0.27         | 0.19 |
| Mefenpyr-diethyl     | 11.71  | 0.17   | 11.66  | 11.75  | -0.42         | 0.35 | 1.170                                  | 0.11    | 1.166   | 1.172   | -0.32         | 0.23 |
| Diazinon             | 11.71  | 0.16   | 11.66  | 11.76  | -0.38         | 0.42 | 1.170                                  | 0.11    | 1.166   | 1.173   | -0.34         | 0.24 |



**Table S4. Stability of (relative) retention times of pesticides (continued).**

| Compound name         | sample | sample | sample | sample | %dev from ave |      | sample | sample  | sample  | sample  | %dev from ave |      |
|-----------------------|--------|--------|--------|--------|---------------|------|--------|---------|---------|---------|---------------|------|
|                       | ave RT | RSD RT | RT min | RT max | min           | max  | RRT    | RRT RSD | RRT min | RRT max | min           | max  |
| Benzoximate           | 11.75  | 0.19   | 11.70  | 11.80  | -0.40         | 0.39 | 1.174  | 0.12    | 1.171   | 1.177   | -0.29         | 0.24 |
| Hexaconazole          | 11.77  | 0.16   | 11.72  | 11.81  | -0.39         | 0.38 | 1.176  | 0.11    | 1.171   | 1.179   | -0.42         | 0.25 |
| Fenclorazole-ethyl    | 11.79  | 0.17   | 11.75  | 11.84  | -0.37         | 0.42 | 1.178  | 0.12    | 1.174   | 1.182   | -0.38         | 0.29 |
| Phosalone             | 11.80  | 0.16   | 11.75  | 11.84  | -0.38         | 0.40 | 1.179  | 0.12    | 1.174   | 1.182   | -0.40         | 0.29 |
| Prochloraz            | 11.82  | 0.17   | 11.77  | 11.86  | -0.42         | 0.36 | 1.181  | 0.12    | 1.177   | 1.183   | -0.30         | 0.23 |
| Difenoconazole        | 11.93  | 0.17   | 11.87  | 11.97  | -0.46         | 0.39 | 1.192  | 0.13    | 1.187   | 1.195   | -0.38         | 0.27 |
| Pencycuron            | 11.94  | 0.16   | 11.90  | 11.98  | -0.34         | 0.32 | 1.193  | 0.10    | 1.189   | 1.196   | -0.33         | 0.31 |
| Pyrazophos            | 11.97  | 0.16   | 11.93  | 12.02  | -0.36         | 0.42 | 1.196  | 0.13    | 1.192   | 1.200   | -0.34         | 0.31 |
| Diflufenican          | 11.98  | 0.19   | 11.93  | 12.03  | -0.41         | 0.41 | 1.196  | 0.14    | 1.192   | 1.201   | -0.38         | 0.42 |
| Pirimiphos-methyl     | 11.98  | 0.17   | 11.94  | 12.02  | -0.38         | 0.36 | 1.197  | 0.12    | 1.194   | 1.200   | -0.29         | 0.24 |
| Emamectin             | 11.99  | 0.36   | 11.89  | 12.05  | -0.85         | 0.55 | 1.198  | 0.24    | 1.192   | 1.202   | -0.51         | 0.39 |
| Clethodim             | 12.04  | 0.15   | 12.01  | 12.09  | -0.27         | 0.39 | 1.203  | 0.14    | 1.198   | 1.207   | -0.36         | 0.31 |
| Spinosyn-A            | 12.34  | 0.35   | 12.25  | 12.43  | -0.72         | 0.74 | 1.233  | 0.23    | 1.227   | 1.240   | -0.43         | 0.58 |
| Cycloxydim            | 12.43  | 0.17   | 12.38  | 12.49  | -0.38         | 0.51 | 1.242  | 0.13    | 1.238   | 1.246   | -0.28         | 0.33 |
| Fenoxaprop-ethyl      | 12.47  | 0.19   | 12.42  | 12.52  | -0.43         | 0.41 | 1.246  | 0.13    | 1.241   | 1.249   | -0.38         | 0.25 |
| Furathiocarb          | 12.71  | 0.20   | 12.64  | 12.77  | -0.54         | 0.42 | 1.270  | 0.13    | 1.265   | 1.274   | -0.44         | 0.27 |
| Cloquintocet-1-meptyl | 12.95  | 0.22   | 12.88  | 13.01  | -0.56         | 0.45 | 1.294  | 0.16    | 1.288   | 1.300   | -0.47         | 0.43 |
| Spinosyn-D            | 13.01  | 0.35   | 12.88  | 13.09  | -0.98         | 0.62 | 1.299  | 0.27    | 1.292   | 1.306   | -0.58         | 0.48 |
| Pirimiphos-ethyl      | 13.02  | 0.22   | 12.94  | 13.08  | -0.55         | 0.46 | 1.300  | 0.15    | 1.294   | 1.305   | -0.46         | 0.32 |
| Tralkoxydim           | 13.08  | 0.18   | 13.03  | 13.15  | -0.36         | 0.51 | 1.307  | 0.16    | 1.301   | 1.313   | -0.43         | 0.45 |
| Flucycloxuron         | 13.24  | 0.23   | 13.17  | 13.32  | -0.51         | 0.64 | 1.322  | 0.18    | 1.316   | 1.328   | -0.48         | 0.44 |
| Chlorpyrifos          | 13.35  | 0.22   | 13.28  | 13.42  | -0.56         | 0.50 | 1.334  | 0.18    | 1.329   | 1.340   | -0.38         | 0.47 |
| Hexythiazox           | 13.36  | 0.24   | 13.28  | 13.44  | -0.63         | 0.55 | 1.335  | 0.17    | 1.331   | 1.339   | -0.33         | 0.33 |
| Diafenthiuron         | 13.85  | 0.27   | 13.74  | 13.94  | -0.73         | 0.71 | 1.383  | 0.19    | 1.377   | 1.390   | -0.41         | 0.51 |
| Fenpropimorph         | 13.95  | 0.41   | 13.86  | 14.02  | -0.66         | 0.50 | 1.394  | 0.22    | 1.387   | 1.399   | -0.47         | 0.41 |
| Pyridaben             | 14.85  | 0.26   | 14.75  | 14.93  | -0.65         | 0.55 | 1.483  | 0.19    | 1.478   | 1.493   | -0.36         | 0.62 |
| Pyridate              | 15.82  | 0.29   | 15.69  | 15.88  | -0.82         | 0.37 | 1.581  | 0.21    | 1.574   | 1.586   | -0.42         | 0.37 |
| Abamectin             | 15.89  | 0.33   | 15.79  | 15.97  | -0.63         | 0.47 | 1.588  | 0.27    | 1.580   | 1.595   | -0.50         | 0.45 |
| Buminaphos            | 16.01  | 0.30   | 15.89  | 16.08  | -0.74         | 0.43 | 1.599  | 0.23    | 1.591   | 1.606   | -0.52         | 0.42 |
